# Supplementary material for: Effectiveness and Safety of Type- and Energy-based Extracorporeal Shockwave Therapy in Clinical Practice: Umbrella Review and Evidence Mapping
Source: bioRxiv or medRxiv preprint supplement (doi:10.1101/2024.01.07.24300948), 2024-01-09
Supplement: Supplementary file [file media-2.pdf]

## Supplementary Figure S2 A list of included 210 systematic reviews

### Systematic reviews from databases,

#### Diseases of the circulatory system:

- [1] Tsai YL, I TJ, Chuang YC, Cheng YY, Lee YC. Extracorporeal Shock Wave Therapy Combined with Complex Decongestive Therapy in Patients with Breast Cancer-Related Lymphedema: A Systemic Review and Meta-Analysis. *J Clin Med* 2021;10:5970. <https://doi.org/10.3390/jcm10245970>.
- [2] Zhang L, Weng C, Zhao Z, Fu X. Extracorporeal shock wave therapy for chronic wounds: A systematic review and meta-analysis of randomized controlled trials. *Wound Repair Regen* 2017;25:697-706. <https://doi.org/10.1111/wrr.12566>.
- [3] Huang Q, Yan P, Xiong H, Shuai T, Liu J, Zhu L, et al. Extracorporeal Shock Wave Therapy for Treating Foot Ulcers in Adults With Type 1 and Type 2 Diabetes: A Systematic Review and Meta-Analysis of Randomized Controlled Trials. *Can J Diabetes* 2020;44:196-204.e3. <https://doi.org/10.1016/j.cjcd.2019.05.006>.
- [4] Munir Z, Akash M, Jaiprada F, Abu Tarboush B, Ijaz O, Bseiso A, et al. Evaluation of the Effects of Extracorporeal Shockwave Therapy in Patients With Peripheral Arterial Disease: A Meta-Analysis of Randomized Control Trials. *Cureus* 2023;15:e34729. <https://doi.org/10.7759/cureus.34729>.

#### Diseases of the genitourinary system:

- [1] Sokolakis I, Hatzichristodoulou G. Clinical studies on low intensity extracorporeal shockwave therapy for erectile dysfunction: a systematic review and meta-analysis of randomised controlled trials. *Int J Impot Res* 2019;31:177-94. <https://doi.org/10.1038/s41443-019-0117-z>.
- [2] Dong L, Chang D, Zhang X, Li J, Yang F, Tan K, et al. Effect of Low-Intensity Extracorporeal Shock Wave on the Treatment of Erectile Dysfunction: A Systematic Review and Meta-Analysis. *Am J Mens Health* 2019;13:1557988319846749. <https://doi.org/10.1177/1557988319846749>.
- [3] Clavijo RI, Kohn TP, Kohn JR, Ramasamy R. Effects of Low-Intensity Extracorporeal Shockwave Therapy on Erectile Dysfunction: A Systematic Review and Meta-Analysis. *J Sex Med* 2017;14:27-35. <https://doi.org/10.1016/j.jsxm.2016.11.001>.
- [4] Mo D, Zhan X, Shi H, Cai H, Meng J, Zhao J, et al. Efficacy and safety of low-intensity extracorporeal shock wave therapy in the treatment of ED:A meta-analysis of randomized controlled trials. *Zhonghua nan ke xue* 2019;25:257-64. <https://doi.org/10.13263.j.cnki.nja.2019.03.010>.
- [5] Kalka D, Biernikiewicz M, Gebala J, Bielecka-Jarząbek G, Zdrojowy R, Pilecki W. Efficacy of low energy shock-wave therapy generated using an electrohydraulic device in the treatment of ED: A systematic review and meta-analysis of randomized controlled trials. *Arch Esp Urol* 2021;74:606-17.
- [6] Liu J, Jiang G, Liao B, Li Y, Li X, Wu T. Efficacy of low-intensity extracorporeal shock wave therapy for erectile dysfunction:a Meta analysis. *Chongqing Med* 2018;47:4033-38,4043. <https://doi.org/10.3969/j.issn.1671-8348.2018.31.017>.
- [7] Rho BY, Kim SH, Ryu JK, Kang DH, Kim JW, Chung DY. Efficacy of Low-Intensity Extracorporeal Shock Wave Treatment in Erectile Dysfunction Following Radical Prostatectomy: A Systematic Review and Meta-Analysis. *J Clin Med* 2022;11:2775. <https://doi.org/10.3390/jcm11102775>.
- [8] Angulo JC, Arance I, de Las Heras MM, Meilán E, Esquinas C, Andrés EM. Efficacy of low-intensity shock wave therapy for erectile dysfunction: A systematic review and meta-analysis. *Actas Urol Esp* 2017;41:479-90. <https://doi.org/10.1016/j.acuro.2016.07.005>.
- [9] Man L, Li G. Low-intensity Extracorporeal Shock Wave Therapy for Erectile Dysfunction: A Systematic Review and Meta-analysis. *Urology* 2018;119:97-103. <https://doi.org/10.1016/j.urolo>

[gy.2017.09.011](https://doi.org/10.1016/j.eururo.2016.05.050).

- [10] Lu Z, Lin G, Reed-Maldonado A, Wang C, Lee YC, Lue TF. Low-intensity Extracorporeal Shock Wave Treatment Improves Erectile Function: A Systematic Review and Meta-analysis. *Eur Urol* 2017;71:223-33. <https://doi.org/10.1016/j.eururo.2016.05.050>.
- [11] Campbell JD, Trock BJ, Oppenheim AR, Anusionwu I, Gor RA, Burnett AL. Meta-analysis of randomized controlled trials that assess the efficacy of low-intensity shockwave therapy for the treatment of erectile dysfunction. *Ther Adv Urol* 2019;11:1756287219838364. <https://doi.org/10.1177/1756287219838364>.
- [12] Zou ZJ, Tang LY, Liu ZH, Liang JY, Zhang RC, Wang YJ, et al. Short-term efficacy and safety of low-intensity extracorporeal shock wave therapy in erectile dysfunction: a systematic review and meta-analysis. *Int Braz J Urol* 2017;43:805-21. <https://doi.org/10.1590/S1677-5538.IBJU.2016.0245>.
- [13] Yao H, Wang X, Liu H, Sun F, Tang G, Bao X, et al. Systematic Review and Meta-Analysis of 16 Randomized Controlled Trials of Clinical Outcomes of Low-Intensity Extracorporeal Shock Wave Therapy in Treating Erectile Dysfunction. *Am J Mens Health* 2022;16:15579883221087532. <https://doi.org/10.1177/15579883221087532>.
- [14] Gao L, Qian S, Tang Z, Li J, Yuan J. A meta-analysis of extracorporeal shock wave therapy for Peyronie's disease. *Int J Impot Res* 2016;28:161-6. <https://doi.org/10.1038/ijir.2016.24>.
- [15] Jiang H, Gao Q, Zhu L, Zhang Z, Chen H, Chen Y, et al. Efficacy of extracorporeal shock wave therapy in the treatment of peyronie's disease: a Meta-analysis. *Int J Urol Nephrol* 2017;37:97-102. <https://doi.org/10.3760/cma.j.issn.1673-4416.2017.01.030>.
- [16] Bakr AM, El-Sakka AI. Extracorporeal Shockwave Therapy in Peyronie's Disease: Systematic Review and Meta-Analysis. *J Sex Med* 2021;18:1705-14. <https://doi.org/10.1016/j.jsxm.2021.06.012>.

#### **Diseases of the musculoskeletal system or connective tissue:**

- [1] Fan Y, Feng Z, Cao J, Fu W. Efficacy of Extracorporeal Shock Wave Therapy for Achilles Tendinopathy: A Meta-analysis. *Orthop J Sports Med* 2020;8:2325967120903430. <https://doi.org/10.1177/2325967120903430>.
- [2] Sussmilch-Leitch SP, Collins NJ, Bialocerkowski AE, Warden SJ, Crossley KM. Physical therapies for Achilles tendinopathy: systematic review and meta-analysis. *J Foot Ankle Res* 2012;5:15. <https://doi.org/10.1186/1757-1146-5-15>.
- [3] Stania M, Malá J, Chmielewska D. The Efficacy of Extracorporeal Shock Wave Therapy as a Monotherapy for Achilles Tendinopathy: A Systematic Review and Meta-Analysis. *J. Chiropr* 2023;22:294-301. <https://doi.org/10.1016/j.jcm.2023.04.003>.
- [4] Häußer J, Wieber J, Catalá-Lehnen P. The use of extracorporeal shock wave therapy for the treatment of bone marrow oedema - a systematic review and meta-analysis. *J Orthop Surg Res* 2021;16:369. <https://doi.org/10.1186/s13018-021-02484-5>.
- [5] Angileri HS, Gohal C, Comeau-Gauthier M, Owen MM, Shanmugaraj A, Terry MA, et al. Chronic calcific tendonitis of the rotator cuff: a systematic review and meta-analysis of randomized controlled trials comparing operative and nonoperative interventions. *J Shoulder Elbow Surg* 2023;32:1746-60. <https://doi.org/10.1016/j.jse.2023.03.017>.
- [6] Ioppolo F, Tattoli M, Di Sante L, Venditto T, Tognolo L, Delicata M, et al. Clinical improvement and resorption of calcifications in calcific tendinitis of the shoulder after shock wave therapy at 6 months' follow-up: a systematic review and meta-analysis. *Arch Phys Med Rehabil* 2013;94:1699-1706. <https://doi.org/10.1016/j.apmr.2013.01.030>.

- [7] Louwerens JK, Sierevelt IN, van Noort A, van den Bekerom MP. Evidence for minimally invasive therapies in the management of chronic calcific tendinopathy of the rotator cuff: a systematic review and meta-analysis. *J Shoulder Elbow Surg* 2014;23:1240-9. <https://doi.org/10.1016/j.jse.2014.02.002>.
- [8] Wang Q, Liu S, Wei X, Xing G. Extracorporeal shock wave therapy for calcifying tendinitis of rotator cuff: a meta-analysis. *Chin J Front Med Sci (Electron Ed)* 2017;9:1-6. <https://doi.org/10.12037/YXQY.2017.02-01>.
- [9] Vavken P, Holinka J, Rompe JD, Dorotka R. Focused extracorporeal shock wave therapy in calcifying tendinitis of the shoulder: a meta-analysis. *Sports Health*. 2009;1:137-44. <https://doi.org/10.1177/194173810833119>.
- [10] Wu H, Wu J, Wen G. A Meta-analysis of clinical efficacy of extracorporeal shock wave therapy on cervical spondylotic radiculopathy. *Clin J. Chin Med* 2023;15:132-7. <https://doi.org/10.3969/j.issn.1674-7860.2023.11.027>.
- [11] Zhu C, Wei R, Zhang S, Chen W, Yu B. Effectiveness of extracorporeal shock wave therapy for frozen shoulder: a Meta-analysis. *Chinese J. Tissue Eng. Res* 2017;21:4585-92. <https://doi.org/10.3969/j.issn.2095-4344.2017.28.025>.
- [12] Hou C, Zhao Y, Chen Y, Wu L, Li Y, Wei J. Effectiveness of Shockwave Therapy for Scapulohumeral Periarthritis : A Meta Analysis. *Chinese J Trad Med Traum Orthop* 2019;27:34-9.
- [13] Guan F. Efficacy Observation of Extracorporeal Shock Wave Therapy for Adhesive Capsulitis: A Meta-Analysis. *Guangzhou Medical University* 2018. <https://doi.org/10.7666/d.D01553244>.
- [14] Zhang R, Wang Z, Liu R, Zhang N, Guo J, Huang Y. Extracorporeal Shockwave Therapy as an Adjunctive Therapy for Frozen Shoulder: A Systematic Review and Meta-analysis. *Orthop J Sports Med* 2022;10:23259671211062222. <https://doi.org/10.1177/23259671211062222>.
- [15] Han N, Liu M, Cu H, Zhang Y, Xue L, Duan B. Meta-analysis of the clinical effect of extracorporeal shock wave therapy in the treatment of scapulohumeral periarthritis. *Int J Lab Med* 2020;41:1412-7. <https://doi.org/10.3969/j.issn.1673-4130.2020.12.002>.
- [16] Liao CD, Tsao JY, Chen HC, Liou TH. Efficacy of Extracorporeal Shock Wave Therapy for Lower-Limb Tendinopathy: A Meta-analysis of Randomized Controlled Trials. *Am J Phys Med Rehabil* 2018;97:605-19. <https://doi.org/10.1097/PHM.0000000000000925>.
- [17] Hu Q, Yang L, Wang S, Li W. A meta-analysis of the clinical efficacy of extracorporeal shock wave therapy in the treatment of knee osteoarthritis. *J. Mod. Med. Health* 2021;37:4008-15. <https://doi.org/10.3969/j.issn.1009-5519.2021.23.012>.
- [18] Li T, Ma J, Zhao T, Gao F, Sun W. Application and efficacy of extracorporeal shockwave treatment for knee osteoarthritis: A systematic review and meta-analysis. *Exp Ther Med* 2019;18:2843-50. <https://doi.org/10.3892/etm.2019.7897>.
- [19] Wang D, Wang Z, Cao X. Comparison of the short-term efficacy of extracorporeal shock wave therapy for middle-aged and elderly knee osteoarthritis: a meta-analysis. *Chinese J. Tissue Eng. Res* 2021;25:1471-6. <https://doi.org/10.3969/j.issn.2095-4344.3767>.
- [20] Silva AC, Almeida VS, Veras PM, Carnaúba F, Filho JE, Garcia M, et al. Effect of extracorporeal shock wave therapy on pain and function in patients with knee osteoarthritis: a systematic review with meta-analysis and grade recommendations. *Clin Rehabil* 2023;37:760-73. <https://doi.org/10.1177/02692155221146086>.
- [21] Wang YC, Huang HT, Huang PJ, Liu ZM, Shih CL. Efficacy and Safety of Extracorporeal Shockwave Therapy for Treatment of Knee Osteoarthritis: A Systematic Review and Meta-analysis. *Pain Med*

- 2020;21:822-35. <https://doi.org/10.1093/pm/pnz262>.
- [22] Gu J, Li K, Zhang Q, Li L, Bai Z, Wang S. Clinical Efficacy of Extracorporeal Shock Wave in the Treatment of Knee Osteoarthritis: A Meta-analysis. *Rehabil Med* 2022;32:359-66. <https://doi.org/10.3724/SP.J.1329.2022.04012>.
- [23] Chen L, Ye L, Liu H, Yang P, Yang B. Extracorporeal Shock Wave Therapy for the Treatment of Osteoarthritis: A Systematic Review and Meta-Analysis. *Biomed Res Int* 2020;2020:1907821. <https://doi.org/10.1155/2020/1907821>.
- [24] Ma Z, Liu X, Lv T, Xu W. Extracorporeal shockwave therapy for knee osteoarthritis: a meta-analysis. *J Baotou Med* 2023;39:10-5. <https://doi.org/10.16833/j.cnki.jbmc.2023.03.003>.
- [25] Hsieh CK, Chang CJ, Liu ZW, Tai TW. Extracorporeal shockwave therapy for the treatment of knee osteoarthritis: a meta-analysis. *Int Orthop* 2020;44:877-84. <https://doi.org/10.1007/s00264-020-04489-x>.
- [26] Avendaño-Coy J, Comino-Suárez N, Grande-Muñoz J, Avendaño-López C, Gómez-Soriano J. Extracorporeal shockwave therapy improves pain and function in subjects with knee osteoarthritis: A systematic review and meta-analysis of randomized clinical trials. *Int J Surg* 2020;82:64-75. <https://doi.org/10.1016/j.ijisu.2020.07.055>.
- [27] Oliveira S, Andrade R, Valente C, Espregueira-Mendes J, Silva F, Hinckel BB, et al. Mechanical-based therapies may reduce pain and disability in some patients with knee osteoarthritis: A systematic review with meta-analysis. *Knee* 2022;37:28-46. <https://doi.org/10.1016/j.knee.2022.05.005>.
- [28] Yu S, Liu J, Zhou H, Wu H, Xie G, Li J. Meta analysis of extracorporeal shock wave therapy in the treatment of knee osteoarthritis. *Chin Med Herald* 2020;17:69-73.
- [29] Ferreira RM, Torres RT, Duarte JA, Gonçalves RS. Non-Pharmacological and Non-Surgical Interventions for Knee Osteoarthritis: A Systematic Review and Meta-Analysis. *Non-Pharmacological and Non-Surgical Interventions for Knee Osteoarthritis: A Systematic Review and Meta-Analysis. Acta Reumatol Port* 2019;44:173-217.
- [30] Huangfu Z, Wei D, Ao Y. Systematic evaluation and meta-analysis of extracorporeal shock wave therapy in the treatment of knee osteoarthritis. *Chinese J. Tissue Eng. Res* 2020;24: 4414-20. <https://doi.org/10.3969/j.issn.2095-4344.2800>.
- [31] Ma H, Zhang W, Shi J, Zhou D, Wang J. The efficacy and safety of extracorporeal shockwave therapy in knee osteoarthritis: A systematic review and meta-analysis. *Int J Surg* 2020;75:24-34. <https://doi.org/10.1016/j.ijisu.2020.01.017>.
- [32] Yan C, Xiong Y, Chen L, Endo Y, Hu L, Liu M, et al. A comparative study of the efficacy of ultrasonics and extracorporeal shock wave in the treatment of tennis elbow: a meta-analysis of randomized controlled trials. *J Orthop Surg Res* 2019;14:248. <https://doi.org/10.1186/s13018-019-1290-y>.
- [33] Yuan Y, Liu J, Wang T, Peng F, Hu G, Xu Y. Meta-analysis of the comparison between extracorporeal shock wave and block therapy in the treatment of tennis elbow. *Chongqing Med* 2023;52:2644-9. <https://doi.org/10.3969/j.issn.1671-8348.2023.17.016>.
- [34] Bisset L, Paungmali A, Vicenzino B, Beller E. A systematic review and meta-analysis of clinical trials on physical interventions for lateral epicondylalgia. *Br J Sports Med* 2005;39:411-22. <https://doi.org/10.1136/bjism.2004.016170>.
- [35] Wang L, Yang J, Liu X, Liu S. A Meta-Analysis of Medium- and Long-Term Effects of Extracorporeal Shock Wave Therapy on Epicondylitis. *Chin Mani Rehabil Med* 2020;6:23-7. <https://doi.org/10.19787/j.issn.1008-1879.2020.06.010>.

- [36] Karanasios S, Tsamasiotis GK, Michopoulos K, Sakellari V, Gioftsos G. Clinical effectiveness of shockwave therapy in lateral elbow tendinopathy: systematic review and meta-analysis. *Clin Rehabil* 2021;35:1383-98. <https://doi.org/10.1177/02692155211006860>.
- [37] Lian J, Mohamadi A, Chan JJ, Hanna P, Hemmati D, Lechtig A, et al. Comparative Efficacy and Safety of Nonsurgical Treatment Options for Enthesopathy of the Extensor Carpi Radialis Brevis: A Systematic Review and Meta-analysis of Randomized Placebo-Controlled Trials. *Am J Sports Med* 2019;47:3019-29. <https://doi.org/10.1177/0363546518801914>.
- [38] Sayegh ET, Strauch RJ. Does nonsurgical treatment improve longitudinal outcomes of lateral epicondylitis over no treatment? A meta-analysis. *Clin Orthop Relat Res* 2015;473:1093-1107. <https://doi.org/10.1007/s11999-014-4022-y>.
- [39] Yoon SY, Kim YW, Shin IS, Moon HI, Lee SC. Does the Type of Extracorporeal Shock Wave Therapy Influence Treatment Effectiveness in Lateral Epicondylitis? A Systematic Review and Meta-analysis. *Clin Orthop Relat Res* 2020;478:2324-39. <https://doi.org/10.1097/CORR.0000000000001246>.
- [40] Zhong Z, Liu B, Liu G, Wang P, Shi M, Yang M et al. Effectiveness of extracorporeal shock wave therapy for tennis elbow: a meta analysis. *Chinese J. Rehabilitation* 2018;33:496-9. <https://doi.org/10.3870/zgkf.2018.05.016>.
- [41] Zheng C, Zeng D, Chen J, Liu S, Li J, Ruan Z, et al. Effectiveness of extracorporeal shock wave therapy in patients with tennis elbow: A meta-analysis of randomized controlled trials. *Medicine* 2020;99:e21189. <https://doi.org/10.1097/MD.00000000000021189>.
- [42] Elgendy MH, Khalil SE, ElMeligie MM, Elazab DR. Effectiveness of extracorporeal shockwave therapy in treatment of upper and lower limb tendinopathies: A systematic review and meta-analysis. *Physiother Res Int* 2023;e2042. <https://doi.org/10.1002/pri.2042>.
- [43] Hao Z, Feng Y, Li P. Efficacy of Extracorporeal Shock Wave Therapy for Lateral Epicondylitis A Meta-Analysis. *J. Practi Med* 2015;20:3405-8. <https://doi.org/10.3969/j.issn.1006-5725.2015.20.039>.
- [44] Yao G, Chen J, Duan Y, Chen X. Efficacy of Extracorporeal Shock Wave Therapy for Lateral Epicondylitis: A Systematic Review and Meta-Analysis. *Biomed Res Int* 2020;2020:2064781. <https://doi.org/10.1155/2020/2064781>.
- [45] Kim YJ, Wood SM, Yoon AP, Howard JC, Yang LY, Chung KC. Efficacy of Nonoperative Treatments for Lateral Epicondylitis: A Systematic Review and Meta-Analysis. *Plast Reconstr Surg* 2021;147:112-25. <https://doi.org/10.1097/PRS.0000000000007440>.
- [46] Weber C, Thai V, Neuheuser K, Groover K, Christ O. Efficacy of physical therapy for the treatment of lateral epicondylitis: a meta-analysis. *BMC Musculoskelet Disord* 2015;16:223. <https://doi.org/10.1186/s12891-015-0665-4>.
- [47] Wang S, Liu S, Yang J, Lou J, Xing G. Extracorporeal shockwave therapy for lateral epicondylitis: a Meta analysis. *Chin J Front Med Sci (Electron Ed)* 2015;7:21-5. <https://doi.org/10.3969/j.issn.1674-7372.2015.11.006>.
- [48] Xiong Y, Xue H, Zhou W, Sun Y, Liu Y, Wu Q, et al. Shock-wave therapy versus corticosteroid injection on lateral epicondylitis: a meta-analysis of randomized controlled trials. *Phys Sportsmed* 2019;47:284-9. <https://doi.org/10.1080/00913847.2019.1599587>.
- [49] Cheema AS, Doyon J, Lapner P. Transcutaneous electrical nerve stimulation (TENS) and extracorporeal shockwave therapy (ESWT) in lateral epicondylitis: a systematic review and meta-analysis. *JSES Int* 2022;7:351-6. <https://doi.org/10.1016/j.jseint.2022.11.002>.
- [50] Liao CD, Tsao JY, Chen HC, Liou TH. Efficacy of Extracorporeal Shock Wave Therapy for Lower-

Limb Tendinopathy: A Meta-analysis of Randomized Controlled Trials. *Am J Phys Med Rehabil* 2018;97:605-19. <https://doi.org/10.1097/PHM.0000000000000925>.

- [51] Wu T, Li S, Ren J, Wang D, Ai Y. Efficacy of extracorporeal shock waves in the treatment of myofascial pain syndrome: a systematic review and meta-analysis of controlled clinical studies. *Ann Transl Med* 2022;10:165. <https://doi.org/10.21037/atm-22-295>.
- [52] Avendaño-López C, Megía-García Á, Beltran-Alacreu H, Serrano-Muñoz D, Arroyo-Fernández R, Comino-Suárez N, et al. Efficacy of Extracorporeal Shockwave therapy on pain and function in Myofascial Pain Syndrome: A systematic review and meta-analysis of randomized clinical trials. *Am J Phys Med Rehabil*. <https://doi.org/10.1097/PHM.0000000000002286>.
- [53] Zhang Q, Fu C, Huang L, Xiong F, Peng L, Liang Z, et al. Efficacy of Extracorporeal Shockwave Therapy on Pain and Function in Myofascial Pain Syndrome of the Trapezius: A Systematic Review and Meta-Analysis. *Arch Phys Med Rehabil* 2020;101:1437-46. <https://doi.org/10.1016/j.apmr.2020.02.013>.
- [54] Jin R, Liu X, Fang C, Yue S. Extracorporeal Shock Wave Therapy for the Treatment of myofascial pain syndrome: a meta-analysis. *Chinese J. Rehabilitation Med* 2017;32:1167-71. <https://doi.org/10.3969/j.issn.1001-1242.2017.10.016>.
- [55] Su M, Zhang Q, Zhang J. The clinical effect of extracorporeal shock wave therapy on myofascial pain syndrome: a meta-analysis. *Health Prote and Prom* 2022;22:837-40. [https://doi.org/10.3969/j.issn.1671-0223\(s\).2022.06.001](https://doi.org/10.3969/j.issn.1671-0223(s).2022.06.001).
- [56] Jun JH, Park GY, Chae CS, Suh DC. The Effect of Extracorporeal Shock Wave Therapy on Pain Intensity and Neck Disability for Patients With Myofascial Pain Syndrome in the Neck and Shoulder: A Meta-Analysis of Randomized Controlled Trials. *Am J Phys Med Rehabil* 2021;100:120-9. <https://doi.org/10.1097/PHM.0000000000001493>.
- [57] Yoo JI, Oh MK, Chun SW, Lee SU, Lee CH. The effect of focused extracorporeal shock wave therapy on myofascial pain syndrome of trapezius: A systematic review and meta-analysis. *Medicine* 2020;99:e19085. <https://doi.org/10.1097/MD.0000000000019085>.
- [58] Liao CD, Tsao JY, Chen HC, Liou TH. Efficacy of Extracorporeal Shock Wave Therapy for Lower-Limb Tendinopathy: A Meta-analysis of Randomized Controlled Trials. *Am J Phys Med Rehabil* 2018;97:605-19. <https://doi.org/10.1097/PHM.0000000000000925>.
- [59] Li J, Li J, Jin X, Liu S, Zhang L. Efficacy of Extracorporeal Shockwave therapy in Osteonecrosis of the Femoral Head: A meta-analysis. *Med Health* 2023;1:110-5.
- [60] Li J, Zhang B, Kuang G, Lu M. Meta Analysis of Clinical Effect of Shockwave Therapy for Osteonecrosis of the Femoral Head. *Med Innova Chin* 2023;19:159-64. <https://doi.org/10.3969/j.issn.1674-4985.2022.34.038>.
- [61] He X, Wang W, Li W, Zhang H. Meta-analysis of Chinese Medicine Combined with Shock Wave Therapy for Early Femoral Head Necrosis. *J Yunnan Univers of Chin Med* 2021;44:44-51. <https://doi.org/10.19288/j.cnki.issn.1000-2723.2021.03.009>.
- [62] Hao Y, Guo H, Xu Z, Qi H, Wang Y, Lu C, et al. Meta-analysis of the potential role of extracorporeal shockwave therapy in osteonecrosis of the femoral head. *J Orthop Surg Res* 2018;13:166. <https://doi.org/10.1186/s13018-018-0861-7>.
- [63] Mei J, Pang L, Jiang Z. The effect of extracorporeal shock wave on osteonecrosis of femoral head: a systematic review and meta-analysis. *Phys Sportsmed* 2022;50:280-8. <https://doi.org/10.1080/00913847.2021.1936685>.
- [64] Liao CD, Tsao JY, Chen HC, Liou TH. Efficacy of Extracorporeal Shock Wave Therapy for Lower-

- Limb Tendinopathy: A Meta-analysis of Randomized Controlled Trials. *Am J Phys Med Rehabil* 2018;97:605-19. <https://doi.org/10.1097/PHM.0000000000000925>.
- [65] Liao CD, Xie GM, Tsao JY, Chen HC, Liou TH. Efficacy of extracorporeal shock wave therapy for knee tendinopathies and other soft tissue disorders: a meta-analysis of randomized controlled trials. *BMC Musculoskelet Disord* 2018;19:278. <https://doi.org/10.1186/s12891-018-2204-6>.
- [66] Andriolo L, Altamura SA, Reale D, Candrian C, Zaffagnini S, Filardo G. Nonsurgical Treatments of Patellar Tendinopathy: Multiple Injections of Platelet-Rich Plasma Are a Suitable Option: A Systematic Review and Meta-analysis. *Am J Sports Med* 2019;47:1001-18. <https://doi.org/10.1177/0363546518759674>.
- [67] Stania M, Król T, Marszałek W, Michalska J, Król P. Treatment of Jumper's Knee with Extracorporeal Shockwave Therapy: A Systematic Review and Meta-Analysis. *J Hum Kinet* 2022;84:124-34. <https://doi.org/10.2478/hukin-2022-0089>.
- [68] Ge R, Chen W, Wang Q, Xiang W, Dai B. Extracorporeal Shock Wave Therapy and Massage and Physical Therapy for Treatment of Tendon Enthesiopathy: A Systematic Review of Randomized Controlled Trials. *J Liaoning Univ Trad Chin Med* 2013;5:134-6. <https://doi.org/10.13194/j.ljunivtcm.2013.05.136.ger.100>.
- [69] Elgendy MH, Khalil SE, ElMeligie MM, Elazab DR. Effectiveness of extracorporeal shockwave therapy in treatment of upper and lower limb tendinopathies: A systematic review and meta-analysis. *Physiother Res Int* 2023;e2042. <https://doi.org/10.1002/pri.2042>.
- [70] Hickey CJ, Walker D, Lee SJ, Vitato N. The Long-Term Effects of Eccentric Exercise Vs. Extracorporeal Shockwave Therapy in Athletes Aged 18-50 with Lower Extremity Tendinopathy: A Meta-Analysis and Systematic Review. *Ann Physiother Occup Ther* 2019;2:000130. <https://doi.org/10.23880/aphot-16000130>.
- [71] Liao CD, Tsao JY, Chen HC, Liou TH. Efficacy of Extracorporeal Shock Wave Therapy for Lower-Limb Tendinopathy: A Meta-analysis of Randomized Controlled Trials. *Am J Phys Med Rehabil* 2018;97:605-19. <https://doi.org/10.1097/PHM.0000000000000925>.
- [72] Gao N, Zhang Q, Wang S, Wang G. A Meta-analysis of Clinical Efficacy of Extracorporeal Shock Wave for Plantar Fasciitis. *Chin Mani Rehabil Med* 2022;17:15. <https://doi.org/10.19787/j.issn.1008-1879.2022.17.015>.
- [73] Li S, Wang K, Sun H, Luo X, Wang P, Fang S, et al. Clinical effects of extracorporeal shock-wave therapy and ultrasound-guided local corticosteroid injections for plantar fasciitis in adults: A meta-analysis of randomized controlled trials. *Medicine* 2018;97:e13687. <https://doi.org/10.1097/MD.00000000000013687>.
- [74] Chen CM, Lee M, Lin CH, Chang CH, Lin CH. Comparative efficacy of corticosteroid injection and non-invasive treatments for plantar fasciitis: a systematic review and meta-analysis. *Sci Rep* 2018;8:4033. <https://doi.org/10.1038/s41598-018-22402-w>.
- [75] Xiong Y, Wu Q, Mi B, Zhou W, Liu Y, Liu J, et al. Comparison of efficacy of shock-wave therapy versus corticosteroids in plantar fasciitis: a meta-analysis of randomized controlled trials. *Arch Orthop Trauma Surg* 2019;139:529-36. <https://doi.org/10.1007/s00402-018-3071-1>.
- [76] Dizon JN, Gonzalez-Suarez C, Zamora MT, Gambito ED. Effectiveness of extracorporeal shock wave therapy in chronic plantar fasciitis: a meta-analysis. *Am J Phys Med Rehabil* 2013;92(7):606-20. <https://doi.org/10.1097/PHM.0b013e31828cd42b>.
- [77] Lou J, Wang S, Liu S, Xing G. Effectiveness of Extracorporeal Shock Wave Therapy Without Local Anesthesia in Patients With Recalcitrant Plantar Fasciitis: A Meta-Analysis of Rando

-mized Controlled Trials. *Am J Phys Med Rehabil* 2017;96:529-34. <https://doi.org/10.1097/PHM.0000000000000666>.

- [78] Chen K, Shi Q, Zhumu L, Guo X, Qiu W, Zhu Y. Effects of Extracorporeal Shock Wave Therapy on Chronic Plantar Fasciitis: a Meta-analysis and Systematic Review. *J Cervic Lumb* 2022;43:145-51,158. <https://doi.org/10.3969/j.issn.1005-7234.2022.02.001>.
- [79] Ferlito JV, Silva CF, Almeida JC, da Silva Lopes IA, da Silva Almeida R, Leal-Junior ECP, et al. Effects of photobiomodulation therapy (PBMT) on the management of pain intensity and disability in plantar fasciitis: systematic review and meta-analysis. *Lasers Med Sci* 2023;38:163. <https://doi.org/10.1007/s10103-023-03823-0>.
- [80] Guimarães JS, Arcanjo FL, Leporace G, Metsavaht LF, Conceição CS, Moreno MVMG, et al. Effects of therapeutic interventions on pain due to plantar fasciitis: A systematic review and meta-analysis. *Clin Rehabil* 2023;37:727-46. <https://doi.org/10.1177/02692155221143865>.
- [81] Wang YC, Chen SJ, Huang PJ, Huang HT, Cheng YM, Shih CL. Efficacy of Different Energy Levels Used in Focused and Radial Extracorporeal Shockwave Therapy in the Treatment of Plantar Fasciitis: A Meta-Analysis of Randomized Placebo-Controlled Trials. *J Clin Med* 2019;8:1497. <https://doi.org/10.3390/jcm8091497>.
- [82] Sun J, Gao F, Wang Y, Sun W, Jiang B, Li Z. Extracorporeal shock wave therapy is effective in treating chronic plantar fasciitis: A meta-analysis of RCTs. *Medicine* 2017;96:e6621. <https://doi.org/10.1097/MD.0000000000006621>.
- [83] Al-Siyabi Z, Karam M, Al-Hajri E, Alsaif A, Alazemi M, Aldubaikhi AA. Extracorporeal Shockwave Therapy Versus Ultrasound Therapy for Plantar Fasciitis: A Systematic Review and Meta-Analysis. *Cureus* 2022;14:e20871. <https://doi.org/10.7759/cureus.20871>.
- [84] Yin MC, Ye J, Yao M, Cui XJ, Xia Y, Shen QX, et al. Is extracorporeal shock wave therapy clinical efficacy for relief of chronic, recalcitrant plantar fasciitis? A systematic review and meta-analysis of randomized placebo or active-treatment controlled trials. *Arch Phys Med Rehabil* 2014;95:1585-93. <https://doi.org/10.1016/j.apmr.2014.01.033>.
- [85] Zhiyun L, Tao J, Zengwu S. Meta-analysis of high-energy extracorporeal shock wave therapy in recalcitrant plantar fasciitis. *Swiss Med Wkly* 2013;143:w13825. <https://doi.org/10.4414/sm.w.2013.13825>.
- [86] Chen M. Extracorporeal Shock Wave Therapy for Treatment of Rotator Cuff Tear A Meta-analysis. Zhejiang Chinese Medical University 2022.
- [87] Han X, Yuan X. Extracorporeal shock wave therapy for rotator cuff tendinopathy: a meta-analysis. *Chin J Evi-Bas Med* 2021;21:1126-32. <https://doi.org/10.7507/1672-2531.202104149>.
- [88] Hou C, Zhu X, Wu L, Qing W, Dong Y, Zhao Y. Effectiveness of shockwave therapy for stenosing tenosynovitis: A meta-analysis. *J Hainan Med Univers* 2019;25:1670-5. <https://doi.org/10.13210/j.cnki.jhmu.20191009.002>.

#### **Diseases of the nervous system:**

- [1] Kim JC, Jung SH, Lee SU, Lee SY. Effect of extracorporeal shockwave therapy on carpal tunnel syndrome: A systematic review and meta-analysis of randomized controlled trials. *Medicine* 2019;98:e16870. <https://doi.org/10.1097/MD.00000000000016870>.
- [2] Zhang L, Yang T, Pang L, Li Y, Li T, Zhang C, et al. Effects of Extracorporeal Shock Wave Therapy in Patients with Mild-to-Moderate Carpal Tunnel Syndrome: An Updated Systematic Review with Meta-Analysis. *J Clin Med* 2023;12:7363. <https://doi.org/10.3390/jcm12237363>.



- [3] Chen KT, Chen YP, Kuo YJ, Chiang MH. Extracorporeal Shock Wave Therapy Provides Limited Therapeutic Effects on Carpal Tunnel Syndrome: A Systematic Review and Meta-Analysis. *Medicina (Kaunas)* 2022;58:677. <https://doi.org/10.3390/medicina58050677>.
- [4] Li W, Dong C, Wei H, Xiong Z, Zhang L, Zhou J, et al. Extracorporeal shock wave therapy versus local corticosteroid injection for the treatment of carpal tunnel syndrome: a meta-analysis. *J Orthop Surg Res* 2020;15:556. <https://doi.org/10.1186/s13018-020-02082-x>.
- [5] Guo Y, Yun G, Huang M, Liu F. A systematic review of the effectiveness and safety of extracorporeal shock wave therapy in the treatment of children with spastic cerebral palsy. *Zhongguo Yiyao Kexue* 2022;12:39-42+71. <https://doi.org/10.3969/j.issn.2095-0616.2022.11.011>.
- [6] Kim HJ, Park JW, Nam K. Effect of extracorporeal shockwave therapy on muscle spasticity in patients with cerebral palsy: meta-analysis and systematic review. *Eur J Phys Rehabil Med* 2019;55:761-71. <https://doi.org/10.23736/S1973-9087.19.05888-X>.
- [7] Chang MC, Choo YJ, Kwak SG, Nam K, Kim SY, Lee HJ, et al. Effectiveness of Extracorporeal Shockwave Therapy on Controlling Spasticity in Cerebral Palsy Patients: A Meta-Analysis of Timing of Outcome Measurement. *Children (Basel)* 2023;10:332. <https://doi.org/10.3390/children10020332>.
- [8] Liu G, Zhong Z, Jiang W, Chen Y, Xiao N. Extracorporeal shock wave therapy on muscle spasticity in children with cerebral palsy:a meta-analysis. *J. Mod. Med. Health* 2021;37(19):3284-90. <https://doi.org/10.3969/j.issn.1009-5519.2021.19.012>.
- [9] Etoom M, Khraiwesh Y, Lena F, Hawamdeh M, Hawamdeh Z, Centonze D, et al. Effectiveness of Physiotherapy Interventions on Spasticity in People With Multiple Sclerosis: A Systematic Review and Meta-Analysis. *Am J Phys Med Rehabil* 2018;97:793-807. <https://doi.org/10.1097/PHM.0000000000000970>.
- [10] Hu Z, Song J, Bian X, Gao X. Effect of Extracorporeal Shock Wave Therapy on Shoulder-hand Syndrome in Post-stroke Patients: A Meta-analysis of Random Controlled Trial. *Shijie Zuixin Yixue Xinxu Wenzhai* 2023;23:60-6. <https://doi.org/10.3969/j.issn.1671-3141.2023.033.011>.
- [11] Zhang T, Zhang C. Extracorporeal shock wave therapy for shoulder pain after stroke: A systematic review and meta-analysis. *Clin Rehabil* 2023;37:774-90. <https://doi.org/10.1177/02692155231152134>.
- [12] Oh JH, Park HD, Han SH, Shim GY, Choi KY. Duration of Treatment Effect of Extracorporeal Shock Wave on Spasticity and Subgroup-Analysis According to Number of Shocks and Application Site: A Meta-Analysis. *Ann Rehabil Med* 2019;43:163-77. <https://doi.org/10.5535/arm.2019.43.2.163>.
- [13] Ou-Yang LJ, Chen PH, Lee CH, Li TY, Wu YT, Jhou HJ, et al. Effect and Optimal Timing of Extracorporeal Shock-Wave Intervention to Patients With Spasticity After Stroke: A Systematic Review and Meta-analysis. *Am J Phys Med Rehabil* 2023;102:43-51. <https://doi.org/10.1097/PHM.0000000000002019>.
- [14] Lee JY, Kim SN, Lee IS, Jung H, Lee KS, Koh SE. Effects of Extracorporeal Shock Wave Therapy on Spasticity in Patients after Brain Injury: A Meta-analysis. *J Phys Ther Sci* 2014;26:1641-47. <https://doi.org/10.1589/jpts.26.1641>.
- [15] Xiang J, Wang W, Jiang W, Qian Q. Effects of extracorporeal shock wave therapy on spasticity in post-stroke patients: A systematic review and meta-analysis of randomized controlled trials. *J Rehabil Med* 2018;50:852-59. <https://doi.org/10.2340/16501977-2385>.
- [16] Guo J, Zhu Y, Chen B, Li X, Liang L, Zhu Z, et al. Effects of radial extracorporeal shock wave therapy on spasticity in post-stroke patients a meta-analysis. *Chinese J. Rehabilitation Med* 2017;32:207-12. <https://doi.org/10.3969/j.issn.1001-1242.2017.02.017>.

- [17] Azimpour D, Tahan N, Poursaeed F, Dehghan Manshadi F, Ghasemi E. Extracorporeal shock wave therapy for the reduction of post stroke spasticity: review article and meta-analysis. *Tehran Univ Med J* 2017;75:332-42.
- [18] Zhang HL, Jin RJ, Guan L, Zhong DL, Li YX, Liu XB, et al. Extracorporeal Shock Wave Therapy on Spasticity After Upper Motor Neuron Injury: A Systematic Review and Meta-analysis. *Am J Phys Med Rehabil* 2022;101:615-23. <https://doi.org/10.1097/PHM.0000000000001977>.
- [19] Jia G, Ma J, Wang S, Wu D, Tan B, Yin Y, et al. Long-term Effects of Extracorporeal Shock Wave Therapy on Poststroke Spasticity: A Meta-analysis of Randomized Controlled Trials. *J Stroke Cerebrovasc Dis* 2020;29:104591. <https://doi.org/10.1016/j.jstrokecerebrovasdis.2019.104591>.
- [20] Mihai EE, Dumitru L, Mihai IV, Berteanu M. Long-Term Efficacy of Extracorporeal Shock Wave Therapy on Lower Limb Post-Stroke Spasticity: A Systematic Review and Meta-Analysis of Randomized Controlled Trials. *J Clin Med* 2020;10:86. <https://doi.org/10.3390/jcm10010086>.
- [21] Guo P, Gao F, Zhao T, Sun W, Wang B, Li Z. Positive Effects of Extracorporeal Shock Wave Therapy on Spasticity in Poststroke Patients: A Meta-Analysis. *J Stroke Cerebrovasc Dis* 2017;26:2470-6. <https://doi.org/10.1016/j.jstrokecerebrovasdis.2017.08.019>.
- [22] Cabanas-Valdés R, Serra-Llobet P, Rodriguez-Rubio PR, López-de-Celis C, Llauro-Fores M, Calvo-Sanz J. The effectiveness of extracorporeal shock wave therapy for improving upper limb spasticity and functionality in stroke patients: a systematic review and meta-analysis. *Clin Rehabil* 2020;34:1141-56. <https://doi.org/10.1177/0269215520932196>.
- [23] Cabanas-Valdés R, Calvo-Sanz J, Urrütia G, Serra-Llobet P, Pérez-Bellmunt A, Germán-Romero A. The effectiveness of extracorporeal shock wave therapy to reduce lower limb spasticity in stroke patients: a systematic review and meta-analysis. *Top Stroke Rehabil* 2020;27:137-57. <https://doi.org/10.1080/10749357.2019.1654242>.

#### **Diseases of the skin:**

- [1] Zhang L, Fu XB, Chen S, Zhao ZB, Schmitz C, Weng CS. Efficacy and safety of extracorporeal shock wave therapy for acute and chronic soft tissue wounds: A systematic review and meta-analysis. *Int Wound J* 2018;15:590-9. <https://doi.org/10.1111/iwj.12902>.

#### **Injury, poisoning or certain other consequences of external causes:**

- [1] Yang Y, Kang J, Jiang T, Schmitz C, Weng C, Zhang L. Safety and efficacy of treating post-burn pathological scars with extracorporeal shock wave therapy: A meta-analysis of randomised controlled trials. *Wound Repair Regen* 2022;30:595-607. <https://doi.org/10.1111/wrr.13037>.
- [2] Liao CD, Tsao JY, Chen HC, Liou TH. Efficacy of Extracorporeal Shock Wave Therapy for Lower-Limb Tendinopathy: A Meta-analysis of Randomized Controlled Trials. *Am J Phys Med Rehabil* 2018;97:605-19. <https://doi.org/10.1097/PHM.0000000000000925>.

#### **Symptoms, signs or clinical findings, not elsewhere classified:**

- [1] Birowo P, Rangganata E, Rasyid N, Atmoko W. Efficacy and safety of extracorporeal shockwave therapy for the treatment of chronic non-bacterial prostatitis: A systematic review and meta-analysis. *PLoS One* 2020;15:e0244295. <https://doi.org/10.1371/journal.pone.0244295>.
- [2] Ge J, Zhu J. Efficacy of extracorporeal shock wave therapy on chronic prostatitis B: Meta-analysis. *J Clin Pathol Res* 2015;9:1662-7. <https://doi.org/10.3978/j.issn.2095-6959.2015.09.017>.
- [3] Deng G, Wu D. Efficacy of extracorporeal shockwave therapy for chronic non-bacterial prostatitis: A

meta-analysis. *Health Frie* 2020;24:73.

- [4] Yuan P, Ma D, Zhang Y, Gao X, Liu Z, Li R, et al. Efficacy of low-intensity extracorporeal shock wave therapy for the treatment of chronic prostatitis/chronic pelvic pain syndrome: A systematic review and meta-analysis. *Neurourol Urodyn* 2019;38:1457-66. <https://doi.org/10.1002/nau.24017>.
- [5] Liao B, Mou X, Liu J, Wu T, Cui S. Extracorporeal shock wave therapy for chronic prostatitis / chronic pelvic pain syndrome:A meta-analysis. *Zhonghua nan ke xue* 2019;25:914-22. <https://doi.org/10.13263/j.cnki.nja.2019.10.009>.
- [6] Li G, Man L. Low-intensity extracorporeal shock wave therapy for male chronic pelvic pain s -yndrome: a systematic review and meta-analysis. *Transl Androl Urol* 2021;10:1202-11. <https://doi.org/10.21037/tau-20-1423>.
- [7] Mykoniatis I, Pyrgidis N, Sokolakis I, Sountoulides P, Hatzichristodoulou G, Apostolidis A, et al. Low-intensity shockwave therapy for the management of chronic prostatitis/chronic pelvic pain syndrome: a systematic review and meta-analysis. *BJU Int* 2021;128:144-52. <https://doi.org/10.1111/bju.15335>.
- [8] Farshad N, Mohammadreza S, Hasan G, Mohsen M, Ebrahim A. The effect of extracorporeal shock wave therapy in coccydynia: a systematic review and meta-analysis. *Curr Orthop Pract* 2022;33:613-8. <https://doi.org/10.1097/BCO.0000000000001154>.
- [9] Ma J, Yan Y, Wang B, Sun W, Yue D, Wang W. Effectiveness and safety of extracorporeal shock wave treatment for low back pain: a systematic review and meta-analysis of RCTs. *Int J Osteopath Med* 2022;43:39-48. <https://doi.org/10.1016/j.ijosm.2022.03.004>.
- [10] Li C, Xiao Z, Chen L, Pan S. Efficacy and safety of extracorporeal shock wave on low bac k pain: A systematic review and meta-analysis. *Medicine* 2022;101:e32053. <https://doi.org/10.1097/MD.00000000000032053>.
- [11] Liu K, Zhang Q, Chen L, Zhang H, Xu X, Yuan Z, et al. Efficacy and safety of extracorporeal shockwave therapy in chronic low back pain: a systematic review and meta-analysis of 632 patients. *J Orthop Surg Res* 2023;18:455. <https://doi.org/10.1186/s13018-023-03943-x>.
- [12] Yue L, Sun MS, Chen H, Mu GZ, Sun HL. Extracorporeal Shockwave Therapy for Treating Chronic Low Back Pain: A Systematic Review and Meta-analysis of Randomized Controlled Trials. *Biomed Res Int* 2021;2021:5937250. <https://doi.org/10.1155/2021/5937250>.
- [13] Li B, Zhang S, Ye Y, Yu D, Yu S, Meng Q et al. Effects of excropoeal shock wave on the treatment of heel pain: A Meta-analysis. *J Clin Orthop Res* 2018;3:139-42. <https://doi.org/10.19548/j.2096-269x.2018.03.003>.
- [14] Salvioli S, Guidi M, Marcotulli G. The effectiveness of conservative, non-pharmacological treatment, of plantar heel pain: A systematic review with meta-analysis. *Foot (Edinb)* 2017;33:57-67. <https://doi.org/10.1016/j.foot.2017.05.004>.

### **Systematic reviews from PROSPERO,**

- [1] Yang Han, Chang Qianzhen, Zhang Hong. A comparative study of the efficacy of extracorporeal shock wave and other musculoskeletal therapies in the treatment of lumbar disc herniation: a meta-analysis of randomized controlled trials. PROSPERO 2022 CRD4202222231 Available from: [https://www.crd.york.ac.uk/prospéro/display\\_record.php?ID=CRD4202222231](https://www.crd.york.ac.uk/prospéro/display_record.php?ID=CRD4202222231).
- [2] Yan Chenchen, Xiong Yuan, Chen Lang, Hu Liangcong, Yori Endo, Liu Guohui, Mi Bobin. A comparative study of the efficacy of ultrasonics and extracorporeal shock wave in the treatment of tennis elbow: a meta-analysis of randomized controlled trials. PROSPERO 2019 CRD42019134467 Available from: [https://www.crd.york.ac.uk/prospéro/display\\_record.php?ID=CRD42019134467](https://www.crd.york.ac.uk/prospéro/display_record.php?ID=CRD42019134467).

- [3] LiTing Wang, Gwo-Chi Hu. A Comparative Study on the Therapeutic Effects of Extracorporeal Shock Wave Therapy, Therapeutic Ultrasound, Laser therapy, Short Wave Diathermy in Combination with Exercise for Knee Osteoarthritis. PROSPERO 2023 CRD42023411073 Available from: [https://www.crd.york.ac.uk/prospero/display\\_record.php?ID=CRD42023411073](https://www.crd.york.ac.uk/prospero/display_record.php?ID=CRD42023411073).
- [4] Lezheng Wang, Jian Yang. A meta-analysis of medium- and long-term efficacy of extracorporeal shock wave therapy in the treatment of external humeral epicondylitis. PROSPERO 2019 CRD42019138667 Available from: [https://www.crd.york.ac.uk/prospero/display\\_record.php?ID=CRD42019138667](https://www.crd.york.ac.uk/prospero/display_record.php?ID=CRD42019138667).
- [5] Xiangyu Zhu, Xiao dan Xie. A meta-analysis of the clinical efficacy of extracorporeal shock wave therapy in the treatment of Achilles tendinitis. PROSPERO 2022 CRD42022308774 Available from: [https://www.crd.york.ac.uk/prospero/display\\_record.php?ID=CRD42022308774](https://www.crd.york.ac.uk/prospero/display_record.php?ID=CRD42022308774).
- [6] Xiaoxi mou. Clinical efficacy of extracorporeal shock wave in the treatment of achilles tendinopathy: a meta-analysis. PROSPERO 2020 CRD42020139411 Available from: [https://www.crd.york.ac.uk/prospero/display\\_record.php?ID=CRD42020139411](https://www.crd.york.ac.uk/prospero/display_record.php?ID=CRD42020139411).
- [7] Rocky Nurakbariansyah, Johan Renaldo. Comparative Efficacy of Combined Low-Intensity Extracorporeal Shockwave Therapy and Oral Therapy vs Oral Therapy Alone For Chronic Pelvic Pain Syndrome : A Systematic Review and Meta Analysis. PROSPERO 2020 CRD42020212575 Available from: [https://www.crd.york.ac.uk/prospero/display\\_record.php?ID=CRD42020212575](https://www.crd.york.ac.uk/prospero/display_record.php?ID=CRD42020212575).
- [8] Shan xie, Yuqian Zhang, Yulong Bai. Comparison of Effects of Extracorporeal Shock Wave Intervention and others Interventions in Patients with Spasticity After Brain Injury: A Systematic Review and Meta-analysis. PROSPERO 2023 CRD42023402877 Available from: [https://www.crd.york.ac.uk/prospero/display\\_record.php?ID=CRD42023402877](https://www.crd.york.ac.uk/prospero/display_record.php?ID=CRD42023402877).
- [9] Kim Da jeong, yusung jang. Comparison of the effects of injection therapies and extracorporeal shock waves for the treatment of chronic musculoskeletal disorders: A Systematic Review and Meta-Analysis of Randomized Controlled Trials. PROSPERO 2023 CRD42023395284 Available from: [https://www.crd.york.ac.uk/prospero/display\\_record.php?ID=CRD42023395284](https://www.crd.york.ac.uk/prospero/display_record.php?ID=CRD42023395284).
- [10] Kiyeeun Nam, Hyun Jung Kim, Aeri Yoo, Bum Sun Kwon. Effect of extracorporeal shock wave therapy on muscle spasticity in children with cerebral palsy : meta-analysis & systematic review. PROSPERO 2017 CRD42017064469 Available from: [https://www.crd.york.ac.uk/prospero/display\\_record.php?ID=CRD42017064469](https://www.crd.york.ac.uk/prospero/display_record.php?ID=CRD42017064469).
- [11] Xue Xiali, Xinwei Yang. Effect of extracorporeal shockwave therapy for rotator cuff injuries: A systematic review and meta-analysis. PROSPERO 2023 CRD42023441407 Available from: [https://www.crd.york.ac.uk/prospero/display\\_record.php?ID=CRD42023441407](https://www.crd.york.ac.uk/prospero/display_record.php?ID=CRD42023441407).
- [12] Diogo Simões Fonseca, Evelyn Silva, Stella Souza, Priscila Veras, Jennifer Peixoto, Cyntia Correa, Rayane Castro. Effect of extracorporeal shockwave therapy on pain and function in patients with patellar tendinopathy: a systematic review of controlled trials with meta-analysis and GRADE recommendations.. PROSPERO 2023 CRD42023396280 Available from: [https://www.crd.york.ac.uk/prospero/display\\_record.php?ID=CRD42023396280](https://www.crd.york.ac.uk/prospero/display_record.php?ID=CRD42023396280).
- [13] Chaitanya J, Muhammad Azharuddin, Majumi M Noohu. Effect of physiotherapeutic interventions on spasticity in adults with cerebral palsy. PROSPERO 2022 CRD42022308439 Available from: [https://www.crd.york.ac.uk/prospero/display\\_record.php?ID=CRD42022308439](https://www.crd.york.ac.uk/prospero/display_record.php?ID=CRD42022308439).
- [14] Lun-Xue QING, Jin YANG, Duo-Duo Li, Bin WANG, Yuan LEI, Si-Na Li, Yan-Yan Sun, Chang-Xin LIU, Xi-You WANG, Zhi-Weng WENG. Effect of the extracorporeal shock wave therapy for knee osteoarthritis: a systematic review and meta analysis of RCTs. PROSPERO 201

- 8 CRD42018084749 Available from: [https://www.crd.york.ac.uk/prospero/display\\_record.php?ID=CRD42018084749](https://www.crd.york.ac.uk/prospero/display_record.php?ID=CRD42018084749).
- [15] LUO ZHIQIANG, YUNTAI XV. Effectiveness and safety of extracorporeal shock wave therapy for lumbar disc herniation based on meta-analysis. PROSPERO 2023 CRD42023449112 Available from: [https://www.crd.york.ac.uk/prospero/display\\_record.php?ID=CRD42023449112](https://www.crd.york.ac.uk/prospero/display_record.php?ID=CRD42023449112).
- [16] Yan Yan, Ma Jinhui. Effectiveness and safety of extracorporeal shock wave treatment for low back pain: a systematic review and meta-analysis of randomized controlled trials. PROSPERO 2021 CRD42021268517 Available from: [https://www.crd.york.ac.uk/prospero/display\\_record.php?ID=CRD42021268517](https://www.crd.york.ac.uk/prospero/display_record.php?ID=CRD42021268517).
- [17] Wang Fangqi, Huang Hailiang. Effectiveness of Extracorporeal Shock Wave Therapy (ESWT) When Combined With Supervised Exercises in Patients With Subacromial Shoulder Pain: A Systematic Review and Meta-analysis. PROSPERO 2022 CRD42022325486 Available from: [https://www.crd.york.ac.uk/prospero/display\\_record.php?ID=CRD42022325486](https://www.crd.york.ac.uk/prospero/display_record.php?ID=CRD42022325486).
- [18] Jia Chen, Zhixiang Liu, Juanhong Pan, Hongpeng Li, Yongshen Wang. Effectiveness of extracorporeal shock wave therapy for bone tissue disease: A systematic review and meta-analysis. PROSPERO 2023 CRD42023407972 Available from: [https://www.crd.york.ac.uk/prospero/display\\_record.php?ID=CRD42023407972](https://www.crd.york.ac.uk/prospero/display_record.php?ID=CRD42023407972).
- [19] IRIS OTERO LUIS, ALICIA DEL SAZ LARA. Effectiveness of extracorporeal shock wave therapy in the treatment of spasticity. Systematic review and meta-analysis. PROSPERO 2023 CRD42023436889 Available from: [https://www.crd.york.ac.uk/prospero/display\\_record.php?ID=CRD42023436889](https://www.crd.york.ac.uk/prospero/display_record.php?ID=CRD42023436889).
- [20] Samah omara, Mohamed ElMeligie. Effectiveness of laser therapy versus extracorporeal shock wave therapy in the treatment of plantar Fasciitis :A Systematic Review and Meta-analysis. PROSPERO 2023 CRD42023455530 Available from: [https://www.crd.york.ac.uk/prospero/display\\_record.php?ID=CRD42023455530](https://www.crd.york.ac.uk/prospero/display_record.php?ID=CRD42023455530).
- [21] Patricia ventura, AFONSO NAZÁRIO, CINIRA HADDAD, GIL FACINA, Samantha rizzi. Effectiveness, safety and tolerability of shockwave therapy for treatment of breast cancer-related lymphedema: a systematic review.. PROSPERO 2020 CRD42020209588 Available from: [https://www.crd.york.ac.uk/prospero/display\\_record.php?ID=CRD42020209588](https://www.crd.york.ac.uk/prospero/display_record.php?ID=CRD42020209588).
- [22] Lehua Yu, Wenwen Ye, Jing Yu. Effects of extracorporeal shock wave therapy in patients with burn scars: A Systematic Review and Meta-Analysis of Randomized Placebo-Controlled Trials. PROSPERO 2022 CRD42022346526 Available from: [https://www.crd.york.ac.uk/prospero/display\\_record.php?ID=CRD42022346526](https://www.crd.york.ac.uk/prospero/display_record.php?ID=CRD42022346526).
- [23] Liu shuai, Pu jiuzhou. Effects of Low-Intensity Extracorporeal Shockwave Therapy on Erectile Dysfunction: A Systematic Review and Meta-Analysis. PROSPERO 2020 CRD42020210731 Available from: [https://www.crd.york.ac.uk/prospero/display\\_record.php?ID=CRD42020210731](https://www.crd.york.ac.uk/prospero/display_record.php?ID=CRD42020210731).
- [24] Yijun Lin, Yifan Zhang, Qian Wang. Effects of Shock Wave Therapy on myofascial pain: a Meta-analysis. PROSPERO 2023 CRD42023432596 Available from: [https://www.crd.york.ac.uk/prospero/display\\_record.php?ID=CRD42023432596](https://www.crd.york.ac.uk/prospero/display_record.php?ID=CRD42023432596).
- [25] Ervandy Ranganata, Ponco Birowo, Nur Rasyid, Widi Atmoko. Efficacy and safety of extracorporeal shock wave therapy for the treatment of chronic non-bacterial prostatitis: a systematic review and meta-analysis. PROSPERO 2020 CRD42020187793 Available from: [https://www.crd.york.ac.uk/prospero/display\\_record.php?ID=CRD42020187793](https://www.crd.york.ac.uk/prospero/display_record.php?ID=CRD42020187793).
- [26] Huan Liu, fo yang, XiaoMin Liu, Li Jiang. Efficacy and safety of extracorporeal shock wave

therapy in the treatment of radial styloid stenosing tenosynovitis: systematic review and meta analysis. PROSPERO 2020 CRD42020205267 Available from: [https://www.crd.york.ac.uk/prospero/display\\_record.php?ID=CRD42020205267](https://www.crd.york.ac.uk/prospero/display_record.php?ID=CRD42020205267).

- [27] Li Zhang, Yanhui Yang, Jingwen Kang, Zhanbo Zhao, Changshui Weng. Efficacy and Safety of Extracorporeal shock wave therapy in Treatment of Hypertrophic Scars and Keloids: A Systematic Review and Meta-Analysis of Randomized Controlled Trials. PROSPERO 2021 CRD42021289708 Available from: [https://www.crd.york.ac.uk/prospero/display\\_record.php?ID=CRD42021289708](https://www.crd.york.ac.uk/prospero/display_record.php?ID=CRD42021289708).
- [28] Li Zhang, Yanhui YANG, Yun Luo, Changshui Weng, Jingwen Kang. Efficacy and Safety of Extracorporeal shock wave therapy in Treatment of Pathological Burn Scars: A Systematic Review and Meta-Analysis of Randomized Controlled Trials.. PROSPERO 2022 CRD42022297573 Available from: [https://www.crd.york.ac.uk/prospero/display\\_record.php?ID=CRD42022297573](https://www.crd.york.ac.uk/prospero/display_record.php?ID=CRD42022297573).
- [29] Kun Liu, Qingyu Zhang. Efficacy and safety of extracorporeal shockwave therapy in chronic low back pain: A systematic review and meta-analysis of 632 patients. PROSPERO 2023 CRD42023421589 Available from: [https://www.crd.york.ac.uk/prospero/display\\_record.php?ID=CRD42023421589](https://www.crd.york.ac.uk/prospero/display_record.php?ID=CRD42023421589).
- [30] Apurba Barman, Sreeja KS, Rituparna Maiti, Jagannatha Sahoo. Efficacy and safety of shock wave stimulations in the treatment of musculoskeletal soft tissue injuries: A systematic review and meta-analysis. PROSPERO 2020 CRD42020202793 Available from: [https://www.crd.york.ac.uk/prospero/display\\_record.php?ID=CRD42020202793](https://www.crd.york.ac.uk/prospero/display_record.php?ID=CRD42020202793).
- [31] Yu-Chi Su, Jing-Chun Lin, Yu-Ching Lin. Efficacy of extracorporeal shock wave in the treatment of plantar and palmar fibromatosis: a systematic review and meta-analysis. PROSPERO 2022 CRD42022371427 Available from: [https://www.crd.york.ac.uk/prospero/display\\_record.php?ID=CRD42022371427](https://www.crd.york.ac.uk/prospero/display_record.php?ID=CRD42022371427).
- [32] Hongcheng Tao, Chaohui Li, Jianjie Wei, Zhihao Lu, Limin Chen, Yinzan Wang, Ping Zeng. Efficacy of extracorporeal shock wave therapy combined with medullary decompression in the treatment of femoral head necrosis: a systematic review and meta-analysis. PROSPERO 2023 CRD42023415733 Available from: [https://www.crd.york.ac.uk/prospero/display\\_record.php?ID=CRD42023415733](https://www.crd.york.ac.uk/prospero/display_record.php?ID=CRD42023415733).
- [33] Kunyuan Wang, Yong Liu, Yuling Gao, Rui Shi. Efficacy of Extracorporeal Shock Wave Therapy for Rotator Cuff Injury: A Systematic Review and Meta-Analysis. PROSPERO 2023 CRD42023440275 Available from: [https://www.crd.york.ac.uk/prospero/display\\_record.php?ID=CRD42023440275](https://www.crd.york.ac.uk/prospero/display_record.php?ID=CRD42023440275).
- [34] Yafeng Li. Efficacy of extracorporeal shock wave therapy for tenosynovitis: a meta-analysis of randomized controlled trials. PROSPERO 2020 CRD42020150461 Available from: [https://www.crd.york.ac.uk/prospero/display\\_record.php?ID=CRD42020150461](https://www.crd.york.ac.uk/prospero/display_record.php?ID=CRD42020150461).
- [35] Xin Gao, Yong Liu, Yuling Gao, Kunyuan Wang. Extracorporeal shock wave therapy for delayed fracture union and nonunion: A Systematic Review and Meta-Analysis. PROSPERO 2023 CRD42023440795 Available from: [https://www.crd.york.ac.uk/prospero/display\\_record.php?ID=CRD42023440795](https://www.crd.york.ac.uk/prospero/display_record.php?ID=CRD42023440795).
- [36] Qiangru Huang, Huaiyu Xiong, Tiankui Shuai, Kehu Yang, Jian Liu, Peijing Yan, Jingjing Liu. Extracorporeal shock wave therapy for foot ulcer in diabetic patients: a systematic review and meta-analysis. PROSPERO 2018 CRD42018118096 Available from: [https://www.crd.york.ac.uk/prospero/display\\_record.php?ID=CRD42018118096](https://www.crd.york.ac.uk/prospero/display_record.php?ID=CRD42018118096).
- [37] Yu Nong Ao. Extracorporeal shock wave therapy for the treatment of knee osteoarthritis: a meta analysis. PROSPERO 2018 CRD42018084618 Available from: [https://www.crd.york.ac.uk/prospero/display\\_record.php?ID=CRD42018084618](https://www.crd.york.ac.uk/prospero/display_record.php?ID=CRD42018084618).

- [38] Lu Chen, Ling Ye. Extracorporeal shock wave therapy for the treatment of osteoarthritis: a systematic review and meta analysis. PROSPERO 2019 CRD42019120534 Available from: [https://www.crd.york.ac.uk/prospero/display\\_record.php?ID=CRD42019120534](https://www.crd.york.ac.uk/prospero/display_record.php?ID=CRD42019120534).
- [39] Sayed Anvar, Moazzam Hussain, Dimple Khurana, Muhammed Minhaj T. Extracorporeal shock wave therapy versus Corticosteroid injection in the treatment of musculoskeletal conditions: A systematic review and meta-analysis.. PROSPERO 2022 CRD42022301839 Available from: [https://www.crd.york.ac.uk/prospero/display\\_record.php?ID=CRD42022301839](https://www.crd.york.ac.uk/prospero/display_record.php?ID=CRD42022301839).
- [40] Zhuorao Wu, Tianqi Zhou, Shuangchun Ai. Extracorporeal shockwave therapy can safely and effectively improve physical and psychological conditions in patients with LBP: A Meta-analysis. PROSPERO 2023 CRD42023453890 Available from: [https://www.crd.york.ac.uk/prospero/display\\_record.php?ID=CRD42023453890](https://www.crd.york.ac.uk/prospero/display_record.php?ID=CRD42023453890).
- [41] Juan Avendaño-Coy, Alvaro Megia Garcia-Carpintero, Diego Serrano-Muñoz, Carlos Avendaño-Lopez, Hector Beltran Alacreu, Natalia Comino-Suarez, Ruben Arroyo-Fernandez. Extracorporeal shock-wave therapy for myofascial pain syndrome: a systematic review and meta-analysis of randomized clinical trials. PROSPERO 2022 CRD42022344766 Available from: [https://www.crd.york.ac.uk/prospero/display\\_record.php?ID=CRD42022344766](https://www.crd.york.ac.uk/prospero/display_record.php?ID=CRD42022344766).
- [42] Bijan Forogh, Amin Karami, Masumeh Bagherzadeh Cham. Investigating the effect of extracorporeal shock wave therapy and ultrasound-guided percutaneous lavage in reducing the pain of rotator cuff calcific tendinopathy; A systematic review and meta-analysis. PROSPERO 2022 CRD42022385068 Available from: [https://www.crd.york.ac.uk/prospero/display\\_record.php?ID=CRD42022385068](https://www.crd.york.ac.uk/prospero/display_record.php?ID=CRD42022385068).
- [43] Kai LI, Jichun WU, MingYue WEN, Kai YAN, Ying LI, ZhangYue LU, JiaLu NI, Qian LI, XiaoYa CHEN, Songbin YANG. Long-term efficacy of extracorporeal shock wave therapy on upper limb spasticity in stroke: A meta-analysis of randomized controlled trials. PROSPERO 2020 CRD42020191142 Available from: [https://www.crd.york.ac.uk/prospero/display\\_record.php?ID=CRD42020191142](https://www.crd.york.ac.uk/prospero/display_record.php?ID=CRD42020191142).
- [44] Fangqi Wang, HaiLiang Huang. Low and medium energy extracorporeal shock wave therapy for tendinopathy-related shoulder pain: A systematic review and meta analysis of randomized controlled trial. PROSPERO 2022 CRD42022322982 Available from: [https://www.crd.york.ac.uk/prospero/display\\_record.php?ID=CRD42022322982](https://www.crd.york.ac.uk/prospero/display_record.php?ID=CRD42022322982).
- [45] Grzegorz Fojecki, Stefan Tiessen, Palle Othser. Low-energy extracorporeal shock wave treatment (ESWT) in urology. PROSPERO 2015 CRD42015015665 Available from: [https://www.crd.york.ac.uk/prospero/display\\_record.php?ID=CRD42015015665](https://www.crd.york.ac.uk/prospero/display_record.php?ID=CRD42015015665).
- [46] Chao Li, yaorui GUO, xia DING, xiumei XU. Meta-analysis and systematic review of the efficacy, safety, and optimal intervention timing of extracorporeal shock wave therapy for limb spasm after stroke.. PROSPERO 2023 CRD42023445630 Available from: [https://www.crd.york.ac.uk/prospero/display\\_record.php?ID=CRD42023445630](https://www.crd.york.ac.uk/prospero/display_record.php?ID=CRD42023445630).
- [47] Shristi Shakya, Bhamini Krishna Rao, Sivakumar Gopalakrishnan, V. S. Venkatesan, Shamanth Madapura S., Harikishan Balakrishna Shetty. Physiotherapy interventions for head and trunk control in children with Cerebral Palsy: A Systematic Review. PROSPERO 2023 CRD42023439960 Available from: [https://www.crd.york.ac.uk/prospero/display\\_record.php?ID=CRD42023439960](https://www.crd.york.ac.uk/prospero/display_record.php?ID=CRD42023439960).
- [48] Hong li Xu, Qian Zhang, Xue Qing, Zhengang Qiu. Safety and efficacy of extracorporeal shock wave therapy for low back pain: a systematic review and meta-analysis of randomized controlled trials. PROSPERO 2023 CRD42023409045 Available from: [https://www.crd.york.ac.uk/prospero/display\\_record.php?ID=CRD42023409045](https://www.crd.york.ac.uk/prospero/display_record.php?ID=CRD42023409045).
- [49] Chaoqun Feng, Junjie Yao, Yizhou Xie, Min Zhao, Youpeng Hu, Ziang Hu, Ruoyan Li, Hao

- yang Wu, Yuanxin Ge, Fei Yang, Xiaohong Fan. Small needle-knife versus extracorporeal shock wave for the treatment of plantar fasciitis: a systematic review with meta-analysis. PROSPERO 2023 CRD42023448813 Available from: [https://www.crd.york.ac.uk/prospero/display\\_record.php?ID=CRD42023448813](https://www.crd.york.ac.uk/prospero/display_record.php?ID=CRD42023448813).
- [50] Jin Mei. the effect of extracorporeal shock wave on osteonecrosis of femoral head: a systematic review and meta analysis. PROSPERO 2020 CRD42020213580 Available from: [https://www.crd.york.ac.uk/prospero/display\\_record.php?ID=CRD42020213580](https://www.crd.york.ac.uk/prospero/display_record.php?ID=CRD42020213580).
- [51] Jun-Il Yoo. The effect of extracorporeal shock wave therapy on myofascial pain syndrome. PROSPERO 2019 CRD42019093590 Available from: [https://www.crd.york.ac.uk/prospero/display\\_record.php?ID=CRD42019093590](https://www.crd.york.ac.uk/prospero/display_record.php?ID=CRD42019093590).
- [52] Yueting wang, peiqiang peng, hong liu, haitao zhang, haiyan xu, wenxi he, shuang zhang. The effect of myofascial manipulation on postpartum dysfunction: A systematic review and meta-analysis. PROSPERO 2022 CRD42022376124 Available from: [https://www.crd.york.ac.uk/prospero/display\\_record.php?ID=CRD42022376124](https://www.crd.york.ac.uk/prospero/display_record.php?ID=CRD42022376124).
- [53] Wang-Sheng Lin, Chen-Ya Yang. The effectiveness and safety of extracorporeal shock wave therapy on secondary lymphedema following breast cancer. PROSPERO 2021 CRD42021268225 Available from: [https://www.crd.york.ac.uk/prospero/display\\_record.php?ID=CRD42021268225](https://www.crd.york.ac.uk/prospero/display_record.php?ID=CRD42021268225).
- [54] Xinchao Shi, Guozhong Zhang, Feng Qi, Pengyu He, Xiao Ye, Hua Song, Longyu Zhang, Zema Wang, Jiao Xu, Lijun Ding. The effectiveness of extracorporeal shock wave therapy in patellar tendinopathy: a systematic review and meta analysis.. PROSPERO 2020 CRD42020157920 Available from: [https://www.crd.york.ac.uk/prospero/display\\_record.php?ID=CRD42020157920](https://www.crd.york.ac.uk/prospero/display_record.php?ID=CRD42020157920).
- [55] Yu Qin, Gecheng Cui, Kehu Yang, Meixuan Li, Yanfei Li, Yue Hu. The Effectiveness Of Extracorporeal Shock Wave Therapy In Patients With Chronic Low Back Pain: A Systematic review and Meta-Analysis of randomized controlled trial. PROSPERO 2020 CRD42020211601 Available from: [https://www.crd.york.ac.uk/prospero/display\\_record.php?ID=CRD42020211601](https://www.crd.york.ac.uk/prospero/display_record.php?ID=CRD42020211601).
- [56] Anuj Punnoose, Alan Norrish. The effectiveness of extracorporeal shock wave therapy on lower limb tendinopathies- a systematic review and meta-analysis. PROSPERO 2013 CRD42013003576 Available from: [https://www.crd.york.ac.uk/prospero/display\\_record.php?ID=CRD42013003576](https://www.crd.york.ac.uk/prospero/display_record.php?ID=CRD42013003576).
- [57] Rosa Cabanas-Valdes, Jordi Calvo Sanz, Pere Ramon Rodríguez Rubio, Ana Germán Romero, Gerard Urrútia Cuchi. The effectiveness of extracorporeal shock wave therapy to improve spasticity of upper limb for post-stroke subjects: a systematic review and meta-analysis. PROSPERO 2018 CRD42018099194 Available from: [https://www.crd.york.ac.uk/prospero/display\\_record.php?ID=CRD42018099194](https://www.crd.york.ac.uk/prospero/display_record.php?ID=CRD42018099194).
- [58] Danyang liu, Juan Li, Rongjiang Jin, Dongling Zhong. The effects and safety of extracorporeal shock wave therapy (ESWT) on spasticity after upper motor neuron injury: a systematic review and meta-analysis of randomized controlled trials. PROSPERO 2019 CRD42019131059 Available from: [https://www.crd.york.ac.uk/prospero/display\\_record.php?ID=CRD42019131059](https://www.crd.york.ac.uk/prospero/display_record.php?ID=CRD42019131059).
- [59] Wei Changhao, Feng Lufang. The efficacy and safety of extracorporeal shock wave combined with sodium hyaluronate in the treatment of knee osteoarthritis: A systematic review and meta-analysis. PROSPERO 2020 CRD42020207804 Available from: [https://www.crd.york.ac.uk/prospero/display\\_record.php?ID=CRD42020207804](https://www.crd.york.ac.uk/prospero/display_record.php?ID=CRD42020207804).
- [60] Shanshan Liu, Li Tang. The efficacy of extracorporeal shock wave therapy on temporomandibular joint disorder: A systematic review and meta-analysis. PROSPERO 2022 CRD42022326883 Available from: [https://www.crd.york.ac.uk/prospero/display\\_record.php?ID=CRD42022326883](https://www.crd.york.ac.uk/prospero/display_record.php?ID=CRD42022326883).



- [61] Lezheng wang, Siyu Liu, Xiangyun Liu, Jian Yang. The efficacy of radial and focused extracorporeal shock wave therapy for chronic prostatitis/chronic pelvic pain syndrome: a systematic evaluation and a meta-analysis of randomized controlled trials. PROSPERO 2020 CRD42020170720 Available from: [https://www.crd.york.ac.uk/prospero/display\\_record.php?ID=CRD42020170720](https://www.crd.york.ac.uk/prospero/display_record.php?ID=CRD42020170720).
- [62] Xiaofeng Wang, Yuanshan Cui, Hongquan Liu. Updated recommendations on the therapeutic role of Extracorporeal Shock Wave Therapy for Peyronie's Disease: Systematic Review and Meta-Analysis. PROSPERO 2023 CRD42023436744 Available from: [https://www.crd.york.ac.uk/prospero/display\\_record.php?ID=CRD42023436744](https://www.crd.york.ac.uk/prospero/display_record.php?ID=CRD42023436744).
