# Supplementary material for: Effectiveness and Safety of Type- and Energy-based Extracorporeal Shockwave Therapy in Clinical Practice: Umbrella Review and Evidence Mapping
Source: bioRxiv or medRxiv preprint supplement (doi:10.1101/2024.01.07.24300948), 2024-01-09
Supplement: Supplementary file [file media-3.pdf]

## Supplementary Figure S3 A list of excluded systematic reviews and reasons for exclusion

### Control interventions did not meet the inclusion criteria:

- [1] Han D, In-hwa P, In H. Extracorporeal Shock Wave Therapy with Meridian and Acupoint Theory for Adhesive Capsulitis: A Systematic Review and Meta-analysis of Randomized Controlled Trials. *J Korean Med Rehabil* 2022;32:55-63. <https://doi.org/10.18325/jkmr.2022.32.2.55>.
- [2] Sansone V, Ravier D, Pascale V, Applefield R, Del Fabbro M, Martinelli N. Extracorporeal Shockwave Therapy in the Treatment of Nonunion in Long Bones: A Systematic Review and Meta-Analysis. *J Clin Med* 2022;11:1977. <https://doi.org/10.3390/jcm11071977>.
- [3] Verstraelen FU, In den Kleef NJ, Jansen L, Morrenhof JW. High-energy versus low-energy extracorporeal shock wave therapy for calcifying tendinitis of the shoulder: which is superior? A meta-analysis. *Clin Orthop Relat Res* 2014;472:2816-25. <https://doi.org/10.1007/s11999-014-3680-0>.
- [4] Matthews BG, Hurn SE, Harding MP, Henry RA, Ware RS. The effectiveness of non-surgical interventions for common plantar digital compressive neuropathy (Morton's neuroma): a systematic review and meta-analysis. *J Foot Ankle Res* 2019;12:12. <https://doi.org/10.1186/s13047-019-0320-7>.
- [5] Shi Y, Zeng R. Meta Analysis of Extracorporeal Shock Wave Therapy in the Treatment of Shoulder Calcific Tendinitis. *Chinese J Trad Med Traum Orthop* 2017;25:26-30.

### Full text unavailable:

- [1] Zhang T, Zhang C. Extracorporeal shock wave therapy for shoulder pain after stroke: A systematic review and meta-analysis. *Clin Rehabil* 2023;37:774-90. <https://doi.org/10.1177/02692155231152134>.
- [2] Nazim B Tengku Yusof T, Seow D, Vig KS. Extracorporeal Shockwave Therapy for Foot and Ankle Disorders: A Systematic Review and Meta-Analysis. *J Am Podiatr Med Assoc* 2022;112:18-191. <https://doi.org/10.7547/18-191>.
- [3] Tai TW, Hsieh CK, Chang CJ, Liu ZW. Extracorporeal Shockwave Therapy to treat osteoarthritis of knees: A meta-analysis. *Osteoporos Int* 2020;31:418.
- [4] Flavin NE, Bannuru RR, Harvey WF, McAlindon TE. High-Energy Extracorporeal Shock Wave Therapy Is Effective for Treating Chronic Calcific Tendonitis of the Shoulder: A Meta-Analysis. *Arthritis rheum* 2012;64:417-8.
- [5] Heah NH, Tan RB, Leow JJ. Low intensity extracorporeal shockwave therapy in the treatment of erectile dysfunction: A systematic review and meta-analysis of randomized trials. *Int. J. Urol* 2016;23:3.
- [6] Su X, Yue Y, Li C, Liao W, Liu J, Li J, et al. The effect of extracorporeal shockwave therapy on the osteonecrosis of the femoral head patients: a system review and meta-analysis. *Basci Clin Pharmacol* 2018;122:9.
- [7] Miccinilli S, Bravi M, Morrone M, Manco D, Bressi F, Campi S, et al. The effectiveness of extracorporeal shock wave therapy on adhesive capsulitis of the shoulder: a systematic review and meta-analysis. *Med Sport.* 2020; 73(2): 341-371. <https://doi.org/10.23736/S0025-7826.20.03667-4>.
- [8] Kong X, Hu W, Dong Z, Tian J, Wang Y, Jin C, et al. The efficacy and safety of low-intensity extracorporeal shock wave treatment combined with or without medications in Chronic prostatitis/chronic pelvic pain syndrome: a systematic review and meta-analysis. *Prostate Cancer*

Prostatic Dis 2023;26:483-94. <https://doi.org/10.1038/s41391-022-00571-0>.

- [9] Luo P, Hao Y, Xu K, Lu C, Xu P. Clinical analysis of focused shock wave in the treatment of osteonecrosis of the femoral head: Meta analysis. U.S. Chin Int J Traum 2021;20:1-4.

#### **Not human being:**

- [1] Alavi SNR, Neishaboori AM, Yousefifard M. Extracorporeal shockwave therapy in spinal cord injury, early to advance to clinical trials? A systematic review and meta-analysis on animal studies. *Neuroradiol J* 2021;34:552-61. <https://doi.org/10.1177/19714009211026899>.
- [2] Daeschler SC, Harhaus L, Schoenle P, Boecker A, Kneser U, Bergmeister KD. Ultrasound and shock-wave stimulation to promote axonal regeneration following nerve surgery: a systematic review and meta-analysis of preclinical studies. *Sci Rep* 2018;8:3168. <https://doi.org/10.1038/s41598-018-21540-5>.

#### **Not meta-analysis:**

- [1] Wang J, Wang J, Zhang K, Wang Y, Bao X. Bayesian Network Meta-Analysis of the Effectiveness of Various Interventions for Nontraumatic Osteonecrosis of the Femoral Head. *Biomed Res Int* 2018;2018:2790163. <https://doi.org/10.1155/2018/2790163>.
- [2] Hsiao MY, Hung CY, Chang KV, Chien KL, Tu YK, Wang TG. Comparative effectiveness of autologous blood-derived products, shock-wave therapy and corticosteroids for treatment of plantar fasciitis: a network meta-analysis. *Rheumatology (Oxford)* 2015;54:1735-43. <https://doi.org/10.1093/rheumatology/kev010>.
- [3] Hsu PC, Chang KV, Chiu YH, Wu WT, Özçakar L. Comparative Effectiveness of Botulinum Toxin Injections and Extracorporeal Shockwave Therapy for Post-Stroke Spasticity: A Systematic Review and Network Meta-Analysis. *EclinicalMedicine* 2021;43:101222. <https://doi.org/10.1016/j.eclinm.2021.101222>.
- [4] Chen PC, Wu KT, Chou WY, Huang YC, Wang LY, Yang TH, et al. Comparative Effectiveness of Different Nonsurgical Treatments for Patellar Tendinopathy: A Systematic Review and Network Meta-analysis. *Arthroscopy* 2019;35:3117-31.e2. <https://doi.org/10.1016/j.arthro.2019.06.017>.
- [5] Li X, Zhang L, Gu S, Sun J, Qin Z, Yue J, et al. Comparative effectiveness of extracorporeal shock wave, ultrasound, low-level laser therapy, noninvasive interactive neurostimulation, and pulsed radiofrequency treatment for treating plantar fasciitis: A systematic review and network meta-analysis. *Medicine* 2018;97:e12819. <https://doi.org/10.1097/MD.00000000000012819>.
- [6] Chang KV, Chen SY, Chen WS, Tu YK, Chien KL. Comparative effectiveness of focused shock wave therapy of different intensity levels and radial shock wave therapy for treating plantar fasciitis: a systematic review and network meta-analysis. *Arch Phys Med Rehabil* 2012;93:1259-68. <https://doi.org/10.1016/j.apmr.2012.02.023>.
- [7] Wu YC, Tsai WC, Tu YK, Yu TY. Comparative Effectiveness of Nonoperative Treatments for Chronic Calcific Tendinitis of the Shoulder: A Systematic Review and Network Meta-Analysis of Randomized Controlled Trials. *Arch Phys Med Rehabil* 2017;98:1678-92.e6. <https://doi.org/10.1016/j.apmr.2017.02.030>.
- [8] Babatunde OO, Legha A, Littlewood C, et al. Comparative effectiveness of treatment options for plantar heel pain: a systematic review with network meta-analysis. *Br J Sports Med* 2019;53:182-94. <https://doi.org/10.1136/bjsports-2017-098998>.
- [9] Zhang J, Zhong S, Tan T, Li J, Liu S, Cheng R, et al. Comparative Efficacy and Patient-Specific

Moderating Factors of Nonsurgical Treatment Strategies for Frozen Shoulder: An Updated Systematic Review and Network Meta-analysis. *Am J Sports Med* 2021;49:1669-79. <https://doi.org/10.1177/0363546520956293>.

- [10] Rhim HC, Kim MS, Choi S, Tenforde AS. Comparative Efficacy and Tolerability of Nonsurgical Therapies for the Treatment of Midportion Achilles Tendinopathy: A Systematic Review With Network Meta-analysis. *Orthop J Sports Med* 2020;8:2325967120930567. <https://doi.org/10.1177/2325967120930567>.
- [11] Liao CD, Chen HC, Huang MH, Liou TH, Lin CL, Huang SW. Comparative Efficacy of Intra-Articular Injection, Physical Therapy, and Combined Treatments on Pain, Function, and Sarcopenia Indices in Knee Osteoarthritis: A Network Meta-Analysis of Randomized Controlled Trials. *Int J Mol Sci* 2023;24:6078. <https://doi.org/10.3390/ijms24076078>.
- [12] Gazendam A, Ekhtiari S, Axelrod D, Gouveia K, Gyemi L, Ayeni O, et al. Comparative Efficacy of Nonoperative Treatments for Greater Trochanteric Pain Syndrome: A Systematic Review and Network Meta-Analysis of Randomized Controlled Trials. *Clin J Sport Med* 2022;32:427-32. <https://doi.org/10.1097/JSM.0000000000000924>.
- [13] Ko VM, Cao M, Qiu J, Fong IC, Fu SC, Yung PS, et al. Comparative short-term effectiveness of non-surgical treatments for insertional Achilles tendinopathy: a systematic review and network meta-analysis. *BMC Musculoskelet Disord* 2023;24:102. <https://doi.org/10.1186/s12891-023-06170-x>.
- [14] Li H, Lv H, Lin T. Comparison of efficacy of eight treatments for plantar fasciitis: A network meta-analysis. *J Cell Physiol* 2018;234:860-70. <https://doi.org/10.1002/jcp.26907>.
- [15] Challoumas D, Biddle M, McLean M, Millar NL. Comparison of Treatments for Frozen Shoulder: A Systematic Review and Meta-analysis. *JAMA Netw Open* 2020;3:e2029581. <https://doi.org/10.1001/jamanetworkopen.2020.29581>.
- [16] Yu X, Zhang D, Chen X, Yang J, Shi L, Pang Q. Effectiveness of various hip preservation treatments for non-traumatic osteonecrosis of the femoral head: A network meta-analysis of randomized controlled trials. *J Orthop Sci* 2018;23:356-64. <https://doi.org/10.1016/j.jos.2017.12.004>.
- [17] Yang J, Zhang X, Liang W, Chen G, Ma Y, Zhou Y, et al. Efficacy of adjuvant treatment for fracture nonunion/delayed union: a network meta-analysis of randomized controlled trials. *BMC Musculoskelet Disord* 2022;23:481. <https://doi.org/10.1186/s12891-022-05407-5>.
- [18] Liu WC, Chen CT, Lu CC, Tsai YC, Liu YC, Hsu CW, et al. Extracorporeal Shock Wave Therapy Shows Superiority Over Injections for Pain Relief and Grip Strength Recovery in Lateral Epicondylitis: A Systematic Review and Network Meta-analysis. *Arthroscopy* 2022;38:2018-34.e12. <https://doi.org/10.1016/j.arthro.2022.01.025>.
- [19] Arirachakaran A, Boonard M, Yamaphai S, Prommahachai A, Kesprayura S, Kongtharvonskul J. Extracorporeal shock wave therapy, ultrasound-guided percutaneous lavage, corticosteroid injection and combined treatment for the treatment of rotator cuff calcific tendinopathy: a network meta-analysis of RCTs. *Eur J Orthop Surg Traumatol* 2017;27:381-90. <https://doi.org/10.1007/s00590-016-1839-y>.
- [20] Challoumas D, Pedret C, Biddle M, Ng NYB, Kirwan P, Cooper B, et al. Management of patellar tendinopathy: a systematic review and network meta-analysis of randomised studies. *BMJ Open Sport Exerc Med* 2021;7:e001110. <https://doi.org/10.1136/bmjsem-2021-001110>.
- [21] Liao CD, Huang YY, Chen HC, Liou TH, Lin CL, Huang SW. Relative Effect of Extracorporeal Shockwave Therapy Alone or in Combination with Noninjective Treatments on Pain and Physical Function in Knee Osteoarthritis: A Network Meta-Analysis of Randomized Controlled

Trials. *Biomedicines* 2022;10:306. <https://doi.org/10.3390/biomedicines10020306>.

- [22] Kang Y, Song P, Cao D, Di X, Lu Y, Liu P, et al. The Efficacy and Safety of Extracorporeal Shockwave Therapy versus Acupuncture in the Management of Chronic Prostatitis/Chronic Pelvic Pain Syndrome: Evidence Based on a Network Meta-analysis. *Am J Mens Health* 2021;15:15579883211057998. <https://doi.org/10.1177/15579883211057998>.
- [23] van der Vlist AC, Winters M, Weir A, Ardern CL, Welton NJ, Caldwell DM, et al. Which treatment is most effective for patients with Achilles tendinopathy? A living systematic review with network meta-analysis of 29 randomised controlled trials. *Br J Sports Med* 2021;55:249-56. <https://doi.org/10.1136/bjsports-2019-101872>.
- [24] Xie C. A Bayesian Network Meta-Analysis Of Multiple Conservative Hip Measures For Non-Traumatic Femoral Head Necrosis. Medical College of Nanchang University 2019.
- [25] Shan G, Zhao J, Zhang H, Tian Y, An L, Luo G. Network Meta-analysis comparing the efficacy of different analgesics in extracorporeal shock wave lithotripsy. *Chin J Urology* 2020;41:936-41. <https://doi.org/10.3760/cma.j.cn112330-20190821-00375>.
- [26] Liu C. External treatment of traditional Chinese and western medicine in the treatment of stenosing tenosynovitis of the radial styloid: network meta-analysis. Liaoning University of Traditional Chinese Medicine 2021.
- [27] Lee HY, Pyun JH, Shim SR, Kim JH. Medical Treatment for Peyronie's Disease: Systematic Review and Network Bayesian Meta-Analysis. *World J Mens Health* 2023. <https://doi.org/10.5534/wjmh.230016>.
- [28] He Y, Lin Y, He X, Li C, Lu Q, He J. The conservative management for improving Visual Analog Scale (VAS) pain scoring in greater trochanteric pain syndrome: a Bayesian analysis. *BMC Musculoskelet Disord* 2023;24:423. <https://doi.org/10.1186/s12891-023-06443-5>.

#### **Protocol:**

- [1] Chen K, Yin S, Wang X, Lin Q, Duan H, Zhang Z, et al. Effect of extracorporeal shock wave therapy for rotator cuff tendonitis: A protocol for systematic review and meta-analysis. *Medicine* 2020;99:e22661. <https://doi.org/10.1097/MD.00000000000022661>.
- [2] Burton I, Cooper K, Alexander L, Swinton PA. Effectiveness of combined shockwave therapy and plantar fascia stretching interventions in treating plantar heel pain: a systematic review and meta-analysis protocol. *JB I Evid Synth* 2021;19:1186-92. <https://doi.org/10.11124/JBIES-20-00186>.
- [3] Qiao XF, Liu SC, Xue Y, Ji QH. Efficacy of extracorporeal shock wave combined spinal cor-e decompression for the treatment of patients with femoral head necrosis: A protocol for sy-stematic review and meta-analysis. *Medicine* 2020;99:e20350. <https://doi.org/10.1097/MD.00000000000020350>.
- [4] Liu DY, Zhong DL, Li J, Jin RJ. The effectiveness and safety of extracorporeal shock wave therapy (ESWT) on spasticity after upper motor neuron injury: A protocol of systematic review and meta-analysis. *Medicine* 2020;99:e18932. <https://doi.org/10.1097/MD.00000000000018932>.
- [5] Qin J, Jin T, He Z, Wu L, Lin Q, Lin Y, et al. The efficacy of extracorporeal shock wave for chronic musculoskeletal pain conditions: A protocol of systematic review and meta-analysis of randomized controlled trials. *Medicine* 2020;99:e19705. <https://doi.org/10.1097/MD.00000000000019705>.
- [6] Rich ALF, Cook JL, Hahne AJ, Ford JJ. A pilot randomised trial comparing individualised physiotherapy versus shockwave therapy for proximal hamstring tendinopathy: a protocol. *J Exp Orthop*. 2023;10(1):55. <https://doi.org/10.1186/s40634-023-00615-x>.

- [7] Tang ZY, Wee JJY, Lim HHR. Effects of shockwave therapy on pain and disability in individuals with rotator cuff tendinopathy: a systematic review protocol. *JBIE Synthesis* 2021;19:1645-50. <https://doi.org/10.11124/JBIES-20-00169>.
