# Supplementary material for: Effectiveness and Safety of Type- and Energy-based Extracorporeal Shockwave Therapy in Clinical Practice: Umbrella Review and Evidence Mapping
Source: bioRxiv or medRxiv preprint supplement (doi:10.1101/2024.01.07.24300948), 2024-01-09
Supplement: Supplementary file [file media-7.pdf]

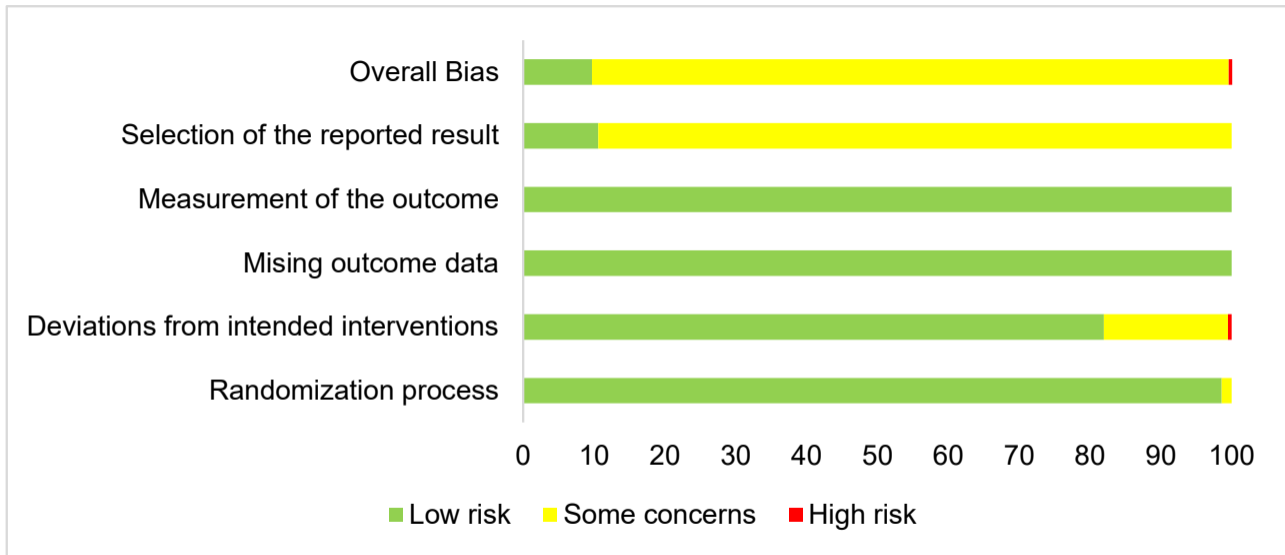

**Supplementary Figure S7 Risk of bias of up-to-date randomised controlled trials**
