# Supplementary material for: Effectiveness and Safety of Type- and Energy-based Extracorporeal Shockwave Therapy in Clinical Practice: Umbrella Review and Evidence Mapping
Source: bioRxiv or medRxiv preprint supplement (doi:10.1101/2024.01.07.24300948), 2024-01-09
Supplement: Supplementary file [file media-8.pdf]

**Supplementary Figure S8 Distribution of single focused extracorporeal shockwave therapy evidence**

| Energy level                                              | Disease or condition                                                                                        | Outcome                                                                                   | No of RCTs | T sample | C sample                 | Effect estimate (95%CI)  | CoE                                                                      | Control group intervention                                                         |
|-----------------------------------------------------------|-------------------------------------------------------------------------------------------------------------|-------------------------------------------------------------------------------------------|------------|----------|--------------------------|--------------------------|--------------------------------------------------------------------------|------------------------------------------------------------------------------------|
| <b>High energy</b>                                        | <b>Large Positive Effect with Moderate Certainty</b>                                                        |                                                                                           |            |          |                          |                          |                                                                          |                                                                                    |
|                                                           | <b>Plantar fasciitis</b>                                                                                    |                                                                                           |            |          |                          |                          |                                                                          |                                                                                    |
|                                                           | fESWT vs SESWT                                                                                              | Pain intensity (Visual Analogue Scale)                                                    | 3          | 255      | 251                      | SMD=-1.88 [-3.06, -0.70] | moderate                                                                 | SESWT: shockwave separated by thin foam cushion or air-chambered polyethylene foil |
|                                                           | <b>Large or Moderate Positive Effect with Very low Certainty</b>                                            |                                                                                           |            |          |                          |                          |                                                                          |                                                                                    |
|                                                           | <b>Myofascial pain syndrome</b>                                                                             |                                                                                           |            |          |                          |                          |                                                                          |                                                                                    |
|                                                           | fESWT vs RH                                                                                                 | Pain intensity (Visual Analogue Scale)                                                    | 1          | 49       | 45                       | SMD=-1.87 [-2.36, -1.39] | very low                                                                 |                                                                                    |
|                                                           | fESWT vs RH                                                                                                 | Sleep quality and quantity (Pittsburgh Sleep Quality Index)                               | 1          | 49       | 45                       | SMD=-1.61 [-2.08, -1.14] | very low                                                                 | RH: ultrasound therapy and transcutaneous electrical nerve stimulation             |
|                                                           | fESWT vs RH                                                                                                 | Depression symptom (Beck Depression Inventory)                                            | 1          | 49       | 45                       | SMD=-1.12 [-1.55, -0.68] | very low                                                                 |                                                                                    |
|                                                           | fESWT vs RH                                                                                                 | Function (Neck Disability Index)                                                          | 1          | 49       | 45                       | SMD=-1.55 [-2.01, -1.08] | very low                                                                 |                                                                                    |
|                                                           | <b>Osteonecrosis of the femoral head</b>                                                                    |                                                                                           |            |          |                          |                          |                                                                          |                                                                                    |
|                                                           | fESWT vs ST                                                                                                 | Function and symptom (Harris Hip Score)                                                   | 1          | 23       | 25                       | SMD=4.51 [3.41, 5.61]    | very low                                                                 | ST: core decompression and bone grafting                                           |
|                                                           | fESWT vs ST                                                                                                 | Pain intensity (Visual Analogue Scale)                                                    | 1          | 23       | 25                       | SMD=-3.44 [-4.36, -2.53] | very low                                                                 |                                                                                    |
|                                                           | <b>Calcific tendinitis of the shoulder</b>                                                                  |                                                                                           |            |          |                          |                          |                                                                          |                                                                                    |
|                                                           | fESWT vs RH                                                                                                 | Function (Constant-Murley Score)                                                          | 1          | 96       | 84                       | SMD=1.17 [0.85, 1.49]    | very low                                                                 | RH: transcutaneous electrical nerve stimulation                                    |
|                                                           | fESWT vs RH                                                                                                 | Pain intensity (Visual Analogue Scale)                                                    | 1          | 96       | 84                       | SMD=-0.68 [-1.11, -0.25] | very low                                                                 |                                                                                    |
|                                                           | <b>Achilles tendinopathy</b>                                                                                |                                                                                           |            |          |                          |                          |                                                                          |                                                                                    |
|                                                           | fESWT vs TCMET                                                                                              | Pain intensity (Visual Analogue Scale)                                                    | 1          | 60       | 60                       | SMD=-0.83 [-1.59, -0.06] | very low                                                                 | TCMET: electro-acupuncture                                                         |
|                                                           | fESWT vs SESWT                                                                                              | Pain intensity, function and alignment (American Orthopedic Foot and Ankle Society Score) | 1          | 44       | 42                       | SMD=0.58 [0.14, 1.01]    | very low                                                                 | SESWT: shockwave without energy stimulation                                        |
|                                                           | <b>Knee osteoarthritis</b>                                                                                  |                                                                                           |            |          |                          |                          |                                                                          |                                                                                    |
|                                                           | fESWT vs DI                                                                                                 | Pain intensity (Visual Analogue Scale)                                                    | 1          | 82       | 44                       | SMD=-1.47 [-1.78, -1.16] | very low                                                                 | DI: alprostadiil                                                                   |
| fESWT vs DI                                               | Pain intensity, stiffness and physical function (Western Ontario and McMaster Universities Arthritis Index) | 1                                                                                         | 82         | 44       | SMD=-1.77 [-2.04, -1.50] | very low                 |                                                                          |                                                                                    |
| <b>Plantar heel pain</b>                                  |                                                                                                             |                                                                                           |            |          |                          |                          |                                                                          |                                                                                    |
| fESWT vs NT                                               | Pain intensity (Visual Analogue Scale)                                                                      | 1                                                                                         | 12         | 10       | SMD=-0.52 [-0.95, -0.09] | very low                 | DI: triamcinolone acetone and lidocaine                                  |                                                                                    |
| fESWT vs DI                                               | Pain intensity (Visual Analogue Scale)                                                                      | 1                                                                                         | 33         | 34       | SMD=-2.12 [-2.49, -1.74] | very low                 |                                                                          |                                                                                    |
| fESWT vs DI                                               | Function (Maryland Foot Score)                                                                              | 1                                                                                         | 33         | 34       | SMD=0.64 [0.36, 0.92]    | very low                 |                                                                          |                                                                                    |
| <b>Small or Very small Effect with Very low Certainty</b> |                                                                                                             |                                                                                           |            |          |                          |                          |                                                                          |                                                                                    |
| <b>Achilles tendinopathy</b>                              |                                                                                                             |                                                                                           |            |          |                          |                          |                                                                          |                                                                                    |
| fESWT vs SESWT                                            | Pain intensity (Visual Analogue Scale)                                                                      | 1                                                                                         | 44         | 42       | SMD=-0.47 [-0.90, -0.04] | very low                 | SESWT: shockwave without energy stimulation                              |                                                                                    |
| <b>Osteonecrosis of the femoral head</b>                  |                                                                                                             |                                                                                           |            |          |                          |                          |                                                                          |                                                                                    |
| fESWT vs TCMIT + MT                                       | Function and symptom (Harris Hip Score)                                                                     | 1                                                                                         | 75         | 78       | SMD=0.25 [0.11, 0.38]    | very low                 | MT: alendronate; TCMIT: xianling gubao capsule                           |                                                                                    |
| fESWT vs TCMIT + MT                                       | Pain intensity (Visual Analogue Scale)                                                                      | 1                                                                                         | 75         | 78       | SMD=-0.17 [-0.30, -0.04] | very low                 |                                                                          |                                                                                    |
| <b>Medium energy</b>                                      | <b>Large Positive Effect with Moderate Certainty</b>                                                        |                                                                                           |            |          |                          |                          |                                                                          |                                                                                    |
|                                                           | <b>Plantar fasciitis</b>                                                                                    |                                                                                           |            |          |                          |                          |                                                                          |                                                                                    |
| fESWT vs SESWT                                            | Pain intensity (Visual Analogue Scale)                                                                      | 2                                                                                         | 176        | 168      | SMD=-0.55 [-0.91, -0.19] | moderate                 | SESWT: shockwave with sound-reflecting pad or minimal energy stimulation |                                                                                    |

Medium energy

Large or Moderate Positive Effect with Low or Very low Certainty

|                                                         |                                                                                                                                     |   |     |    |                          |          |                                                                                                                               |  |
|---------------------------------------------------------|-------------------------------------------------------------------------------------------------------------------------------------|---|-----|----|--------------------------|----------|-------------------------------------------------------------------------------------------------------------------------------|--|
| <b>Rotator cuff tendinopathy</b>                        |                                                                                                                                     |   |     |    |                          |          |                                                                                                                               |  |
| fESWT vs TCMET                                          | Pain intensity (Visual Analogue Scale)                                                                                              | 2 | 40  | 30 | SMD=-5.20 [-7.54, -2.87] | low      | TCMET: electro-acupuncture                                                                                                    |  |
| <b>Erectile dysfunction</b>                             |                                                                                                                                     |   |     |    |                          |          |                                                                                                                               |  |
| fESWT vs SESWT                                          | Function (Sexual Encounter Profile Question 3)                                                                                      | 1 | 30  | 30 | RR=5.50 [2.15, 14.04]    | low      | SESWT: shockwave without energy stimulation                                                                                   |  |
| <b>Stenosing tenosynovitis</b>                          |                                                                                                                                     |   |     |    |                          |          |                                                                                                                               |  |
| fESWT vs DI                                             | Function (Cooney Score)                                                                                                             | 1 | 29  | 28 | SMD=0.63 [0.10, 1.16]    | low      | DI: triamcinolone acetonide and lidocaine                                                                                     |  |
| <b>Low back pain</b>                                    |                                                                                                                                     |   |     |    |                          |          |                                                                                                                               |  |
| fESWT vs SESWT                                          | Pain intensity (Visual Analogue Scale)                                                                                              | 2 | 34  | 31 | SMD=-1.19 [-1.72, -0.66] | low      | SESWT: shockwave separated by special polyethylene cap or of the same sound with minimal energy                               |  |
| <b>Pes anserine tendinopathy</b>                        |                                                                                                                                     |   |     |    |                          |          |                                                                                                                               |  |
| fESWT + RH + MT vs SESWT + RH + MT                      | Pain intensity (McGill Pain Questionnaire)                                                                                          | 1 | 20  | 20 | SMD=-0.79 [-1.24, -0.33] | low      | SESWT: shockwave of the same sound without energy stimulation; RH: stretching exercises; MT: gelofen                          |  |
| <b>Chronic prostatitis/chronic pelvic pain syndrome</b> |                                                                                                                                     |   |     |    |                          |          |                                                                                                                               |  |
| fESWT vs SESWT                                          | Pain intensity, urinary symptoms, and quality of life (National Institutes of Health-Chronic Prostatitis Symptom Index Total Score) | 3 | 69  | 68 | SMD=-4.88 [-7.77, -1.98] | low      |                                                                                                                               |  |
| fESWT vs SESWT                                          | Pain intensity (National Institutes of Health-Chronic Prostatitis Symptom Index Pain Score)                                         | 3 | 69  | 68 | SMD=-5.84 [-9.36, -2.32] | low      | SESWT: shockwave separated by absorbing materials or without energy stimulation                                               |  |
| fESWT vs SESWT                                          | Symptom (National Institutes of Health-Chronic Prostatitis Symptom Index Urinary Score)                                             | 2 | 39  | 38 | SMD=-1.32 [-1.82, -0.82] | very low |                                                                                                                               |  |
| fESWT vs SESWT                                          | Quality of life (National Institutes of Health-Chronic Prostatitis Symptom Index Quality of Life Score)                             | 2 | 39  | 38 | SMD=-1.87 [-2.41, -1.32] | very low |                                                                                                                               |  |
| fESWT vs RH                                             | Pain intensity, urinary symptoms, and quality of life (National Institutes of Health-Chronic Prostatitis Symptom Index Total Score) | 2 | 119 | 95 | SMD=-1.13 [-1.42, -0.84] | very low |                                                                                                                               |  |
| fESWT vs RH                                             | Pain intensity (National Institutes of Health-Chronic Prostatitis Symptom Index Pain Score)                                         | 2 | 119 | 95 | SMD=-0.96 [-1.25, -0.68] | very low | RH: high-frequency hyperthermia                                                                                               |  |
| fESWT vs RH                                             | Quality of life (National Institutes of Health-Chronic Prostatitis Symptom Index Quality of Life Score)                             | 2 | 119 | 95 | SMD=-0.99 [-1.27, -0.70] | very low |                                                                                                                               |  |
| <b>Lateral epicondylitis</b>                            |                                                                                                                                     |   |     |    |                          |          |                                                                                                                               |  |
| fESWT vs RH                                             | Pain intensity (Visual Analogue Scale)                                                                                              | 1 | 40  | 40 | SMD=-0.93 [-1.39, -0.47] | low      | RH: ultrasound therapy and cryotherapy                                                                                        |  |
| fESWT vs TCMET                                          | Pain intensity (Visual Analogue Scale)                                                                                              | 1 | 20  | 20 | SMD=-2.95 [-3.87, -2.03] | very low | TCMET: electro-acupuncture                                                                                                    |  |
| <b>Osteonecrosis of the femoral head</b>                |                                                                                                                                     |   |     |    |                          |          |                                                                                                                               |  |
| fESWT + TCMIT vs TCMIT                                  | Function and symptom (Harris Hip Score)                                                                                             | 1 | 32  | 25 | SMD=2.90 [2.14, 3.66]    | very low | TCMIT: taohongsiwu decoction                                                                                                  |  |
| <b>Achilles tendinopathy</b>                            |                                                                                                                                     |   |     |    |                          |          |                                                                                                                               |  |
| fESWT vs SESWT                                          | Function (Lower Limb Functional Index)                                                                                              | 1 | 22  | 27 | SMD=1.05 [0.45, 1.65]    | very low | SESWT: shockwave separated by opaque cloth                                                                                    |  |
| <b>Patellar tendinopathy</b>                            |                                                                                                                                     |   |     |    |                          |          |                                                                                                                               |  |
| fESWT vs RH + MT                                        | Pain intensity (Visual Analogue Scale)                                                                                              | 1 | 30  | 24 | SMD=-3.47 [-4.34, -2.60] | very low | MT: nonsteroidal anti-inflammatory drugs; RH: physiotherapy, exercise program, knee strap and modification of activity levels |  |
| fESWT vs RH + MT                                        | Symptom (Victorian Institute of Sport Assessment-Patella Questionnaire)                                                             | 1 | 30  | 24 | SMD=4.77 [3.69, 5.85]    | very low |                                                                                                                               |  |
| fESWT vs DI                                             | Pain intensity (Visual Analogue Scale)                                                                                              | 1 | 69  | 69 | SMD=-0.62 [-0.96, -0.28] | very low | DI: platelet-rich plasma                                                                                                      |  |
| <b>Frozen shoulder</b>                                  |                                                                                                                                     |   |     |    |                          |          |                                                                                                                               |  |
| fESWT vs TCMET                                          | Function (Constant-Murley Score)                                                                                                    | 1 | 39  | 39 | SMD=2.00 [1.45, 2.55]    | very low | TCMET: tuina                                                                                                                  |  |
| fESWT vs RH                                             | Pain intensity (Visual Analogue Scale)                                                                                              | 1 | 47  | 47 | SMD=-1.24 [-1.68, -0.80] | very low | RH: medium-frequency electrotherapy and ultrasound therapy                                                                    |  |
| <b>Small Effect with Low Certainty</b>                  |                                                                                                                                     |   |     |    |                          |          |                                                                                                                               |  |
| <b>Low back pain</b>                                    |                                                                                                                                     |   |     |    |                          |          |                                                                                                                               |  |
| fESWT vs SESWT                                          | Pain intensity (Laitinen Pain Scale)                                                                                                | 1 | 20  | 20 | SMD=-0.49 [-0.85, -0.13] | low      | SESWT: shockwave separated by special polyethylene cap                                                                        |  |

|               |                                                         | Large or Moderate Negative Effect with Low or Very low Certainty                                                                    |                                                                                                                                     |                   |                    |                          |                          |                                 |                                                                                                              |
|---------------|---------------------------------------------------------|-------------------------------------------------------------------------------------------------------------------------------------|-------------------------------------------------------------------------------------------------------------------------------------|-------------------|--------------------|--------------------------|--------------------------|---------------------------------|--------------------------------------------------------------------------------------------------------------|
|               |                                                         | Comparison                                                                                                                          | Outcome                                                                                                                             | Level of Evidence | Number of Patients | Number of Events         | Effect Size (95% CI)     | Certainty                       | Notes                                                                                                        |
| Medium energy | <b>Plantar heel pain</b>                                | fESWT vs ST                                                                                                                         | Pain intensity (Visual Analogue Scale)                                                                                              | 1                 | 11                 | 14                       | SMD=1.41 [0.51, 2.31]    | low                             | ST: endoscopic plantar fasciotomy                                                                            |
|               | fESWT vs ST                                             | Pain intensity and function (Roles and maudslay score)                                                                              | 1                                                                                                                                   | 11                | 14                 | SMD=1.53 [0.61, 2.44]    | low                      |                                 |                                                                                                              |
|               | <b>Patellar tendinopathy</b>                            | fESWT vs DI                                                                                                                         | Symptom (Victorian Institute of Sport Assessment-Patella Questionnaire)                                                             | 1                 | 69                 | 69                       | SMD=-0.61 [-0.97, -0.26] | very low                        | DI: platelet-rich plasma                                                                                     |
|               | <b>Carpal tunnel syndrome</b>                           | fESWT vs DI                                                                                                                         | Pain intensity (Visual Analogue Scale)                                                                                              | 2                 | 35                 | 36                       | SMD=0.52 [0.04, 0.99]    | very low                        | DI: triamcinolone acetonide or mecobalamin                                                                   |
|               |                                                         |                                                                                                                                     |                                                                                                                                     |                   |                    |                          |                          |                                 |                                                                                                              |
|               |                                                         | Large or Moderate Positive Effect with Moderate Certainty                                                                           |                                                                                                                                     |                   |                    |                          |                          |                                 |                                                                                                              |
| Low energy    | <b>Erectile dysfunction</b>                             | fESWT vs SESWT                                                                                                                      | Function(International Index of Erectile Function-Erectile Function Domain Score)                                                   | 14                | 505                | 404                      | SMD=0.77 [0.43, 1.10]    | moderate                        | SESWT: shockwave separated by absorbing materials (gel pad, cap, mental plate) or without energy stimulation |
|               | fESWT vs SESWT                                          | Funtion(Erection Hardness Score >= 3 rate)                                                                                          | 7                                                                                                                                   | 330               | 241                | RR=2.55 [1.45, 4.47]     | moderate                 |                                 |                                                                                                              |
|               | <b>Lateral epicondylitis</b>                            | fESWT vs SESWT                                                                                                                      | Pain intensity (Visual Analogue Scale)                                                                                              | 5                 | 196                | 197                      | SMD=-0.67 [-1.16, -0.18] | moderate                        | SESWT: shockwave without energy stimulation                                                                  |
|               |                                                         |                                                                                                                                     |                                                                                                                                     |                   |                    |                          |                          |                                 |                                                                                                              |
|               |                                                         |                                                                                                                                     |                                                                                                                                     |                   |                    |                          |                          |                                 |                                                                                                              |
|               |                                                         | Large or Moderate Positive Effect with Low or Very low Certainty                                                                    |                                                                                                                                     |                   |                    |                          |                          |                                 |                                                                                                              |
| Low energy    | <b>Carpal tunnel syndrome</b>                           | fESWT vs RH                                                                                                                         | Function and symptom (Boston Carpal Tunnel Syndrome Questionnaire)                                                                  | 1                 | 16                 | 9                        | SMD=-0.72 [-1.21, -0.24] | low                             | RH: ultrasound therapy                                                                                       |
|               | <b>Rotator cuff tendinopathy</b>                        | fESWT vs SESWT                                                                                                                      | Function (Constant-Murley Score)                                                                                                    | 1                 | 22                 | 18                       | SMD=1.15 [0.46, 1.83]    | low                             | SESWT: shockwave of the same sound without energy stimulation                                                |
|               | <b>Chronic prostatitis/chronic pelvic pain syndrome</b> | fESWT vs SESWT                                                                                                                      | Pain intensity, urinary symptoms, and quality of life (National Institutes of Health-Chronic Prostatitis Symptom Index Total Score) | 5                 | 158                | 134                      | SMD=-1.20 [-1.61, -0.79] | low                             | SESWT: shockwave of the same sound without energy stimulation                                                |
|               | fESWT vs SESWT                                          | Pain intensity (National Institutes of Health-Chronic Prostatitis Symptom Index Pain Score)                                         | 4                                                                                                                                   | 126               | 123                | SMD=-0.99 [-1.23, -0.75] | low                      |                                 |                                                                                                              |
|               | fESWT vs SESWT                                          | Quality of life (National Institutes of Health-Chronic Prostatitis Symptom Index Quality of Life Score)                             | 4                                                                                                                                   | 126               | 123                | SMD=-1.04 [-1.28, -0.80] | low                      |                                 |                                                                                                              |
|               | fESWT vs SESWT                                          | Pain intensity (Visual Analogue Scale)                                                                                              | 2                                                                                                                                   | 28                | 26                 | SMD=-1.32 [-1.74, -0.90] | low                      |                                 |                                                                                                              |
|               | fESWT vs RH                                             | Pain intensity, urinary symptoms, and quality of life (National Institutes of Health-Chronic Prostatitis Symptom Index Total Score) | 4                                                                                                                                   | 123               | 115                | SMD=-2.15 [-3.31, -0.98] | very low                 | RH: high-frequency hyperthermia |                                                                                                              |
|               | fESWT vs RH                                             | Pain intensity (National Institutes of Health-Chronic Prostatitis Symptom Index Pain Score)                                         | 4                                                                                                                                   | 123               | 115                | SMD=-2.05 [-3.29, -0.82] | very low                 |                                 |                                                                                                              |
|               | <b>Lateral epicondylitis</b>                            | fESWT vs SESWT                                                                                                                      | Function and symptom (Patient-Rated Tennis Elbow Evaluation Questionnaire)                                                          | 1                 | 30                 | 28                       | SMD=1.64 [1.22, 2.07]    | low                             | SESWT: shockwave with minimal energy stimulation                                                             |
|               |                                                         | fESWT vs DI                                                                                                                         | Pain intensity (Visual Analogue Scale)                                                                                              | 1                 | 24                 | 24                       | SMD=-1.28 [-1.90, -0.65] | very low                        | DI: triamcinolone acetonide and lidocaine                                                                    |
|               | <b>Calcific tendinitis of the shoulder</b>              | fESWT vs SESWT                                                                                                                      | Pain intensity (Visual Analogue Scale)                                                                                              | 1                 | 20                 | 18                       | SMD=-3.00 [-3.43, -2.57] | low                             | SESWT: shockwave without energy stimulation                                                                  |
|               | fESWT vs SESWT                                          | Function (Constant-Murley Score)                                                                                                    | 1                                                                                                                                   | 40                | 40                 | SMD=1.40 [0.91, 1.90]    | very low                 |                                 |                                                                                                              |
|               | <b>Cerebral palsy spasticity</b>                        | fESWT vs SESWT                                                                                                                      | Symptom (Modified Ashworth Scale)                                                                                                   | 1                 | 12                 | 12                       | SMD=-2.56 [-6.39, -1.44] | very low                        | SESWT: shockwave of the same sound without energy stimulation                                                |
|               | fESWT vs SESWT                                          | Funtion (Range of Motion)                                                                                                           | 1                                                                                                                                   | 12                | 12                 | SMD=4.19 [2.67, 5.71]    | very low                 |                                 |                                                                                                              |
|               | fESWT vs SESWT                                          | Structure (Plantar Surface Area)                                                                                                    | 1                                                                                                                                   | 12                | 12                 | SMD=6.43 [4.28, 8.57]    | very low                 |                                 |                                                                                                              |

**Low energy**

|                                                      |                                                                                           |   |    |    |                          |          |                                                                 |  |
|------------------------------------------------------|-------------------------------------------------------------------------------------------|---|----|----|--------------------------|----------|-----------------------------------------------------------------|--|
| <b>Post-stroke upper limb spasticity</b>             |                                                                                           |   |    |    |                          |          |                                                                 |  |
| fESWT vs SESWT                                       | Function (Range of Motion)                                                                | 1 | 20 | 20 | SMD=1.35 [0.36, 2.35]    | very low | SESWT: shockwave of the same sound without energy stimulation   |  |
| <b>Myofascial pain syndrome</b>                      |                                                                                           |   |    |    |                          |          |                                                                 |  |
| fESWT vs SESWT                                       | Pain intensity (Visual Analogue Scale)                                                    | 2 | 18 | 22 | SMD=-0.99 [-1.66, -0.32] | very low | SESWT: shockwave of the same sound without energy stimulation   |  |
| fESWT vs SESWT                                       | Pain intensity (Pain Pressure Threshold)                                                  | 2 | 18 | 22 | SMD=1.43 [0.71, 2.14]    | very low |                                                                 |  |
| fESWT vs RH + DI                                     | Function (Range of Motion)                                                                | 1 | 30 | 30 | SMD=1.05 [0.38, 1.72]    | very low | RH: transcutaneous electrical nerve stimulation; DI: not inform |  |
| fESWT vs DI                                          | Pain intensity (Visual Analogue Scale)                                                    | 1 | 30 | 30 | SMD=-1.51 [-2.09, -0.92] | very low |                                                                 |  |
| fESWT vs DI                                          | Pain intensity (Pain Pressure Threshold)                                                  | 1 | 30 | 30 | SMD=1.17 [0.62, 1.73]    | very low | DI: trigger point injections                                    |  |
| fESWT vs DI                                          | Function (Quebec Back Pain Disability Scale)                                              | 1 | 30 | 30 | SMD=-0.66 [-1.18, -0.14] | very low |                                                                 |  |
| <b>Plantar fasciitis</b>                             |                                                                                           |   |    |    |                          |          |                                                                 |  |
| fESWT vs DI                                          | Pain intensity (Visual Analogue Scale)                                                    | 1 | 16 | 16 | SMD=-0.78 [-1.50, -0.06] | very low | DI: methylprednisolone and mepivacaine                          |  |
| <b>Stenosing tenosynovitis</b>                       |                                                                                           |   |    |    |                          |          |                                                                 |  |
| fESWT vs DI                                          | Function (Cooney Score)                                                                   | 1 | 30 | 28 | SMD=1.21 [0.65, 1.78]    | very low | DI: triamcinolone acetonide and lidocaine                       |  |
| fESWT vs SESWT                                       | Pain intensity (Visual Analogue Scale)                                                    | 1 | 20 | 20 | SMD=-0.76 [-1.13, -0.38] | very low |                                                                 |  |
| fESWT vs SESWT                                       | Function and symptom (Disabilities of the Arm, Shoulder, and Hand Questionnaire)          | 1 | 20 | 20 | SMD=-0.52 [-0.99, -0.04] | very low | SESWT: shockwave separated by a specific applicator             |  |
| <b>Small Effect with Low or Very low Certainty</b>   |                                                                                           |   |    |    |                          |          |                                                                 |  |
| <b>Rotator cuff tendinopathy</b>                     |                                                                                           |   |    |    |                          |          |                                                                 |  |
| fESWT vs SESWT                                       | Function and pain intensity (Shoulder Pain and Disability Index)                          | 1 | 34 | 40 | SMD=-0.29 [-0.52, -0.06] | low      | SESWT: shockwave of the same sound without energy stimulation   |  |
| <b>Achilles tendinopathy</b>                         |                                                                                           |   |    |    |                          |          |                                                                 |  |
| fESWT vs RH                                          | Pain intensity, function and alignment (American Orthopedic Foot and Ankle Society Score) | 1 | 30 | 30 | SMD=-0.42 [-0.78, -0.06] | very low | RH: cold air therapy and high power laser therapy               |  |
| <b>Large Negative Effect with Very low Certainty</b> |                                                                                           |   |    |    |                          |          |                                                                 |  |
| <b>Achilles tendinopathy</b>                         |                                                                                           |   |    |    |                          |          |                                                                 |  |
| fESWT vs RH                                          | Pain intensity (Visual Analogue Scale)                                                    | 1 | 30 | 30 | SMD=1.56 [0.63, 2.48]    | very low | RH: cold air therapy and high power laser therapy               |  |

Note: C, control group; CI, confidence interval; CoE, certainty of evidence assessed using the Grading of Recommendations Assessment, Development and Evaluation approach; DI, drug injection; fESWT, focused extracorporeal shockwave therapy; MT, medication therapy; NT, no treatment; RCTs, randomised controlled trials; RH, rehabilitation; RR, relative risk; SESWT, sham extracorporeal shockwave therapy; SMD, standardized mean difference; ST, surgical treatment; T, treatment group; TCMET, traditional Chinese medicine external therapy; TCMIT, traditional Chinese medicine internal therapy.
