# Supplementary material for: Effectiveness and Safety of Type- and Energy-based Extracorporeal Shockwave Therapy in Clinical Practice: Umbrella Review and Evidence Mapping
Source: bioRxiv or medRxiv preprint supplement (doi:10.1101/2024.01.07.24300948), 2024-01-09
Supplement: Supplementary file [file media-9.pdf]

## Supplementary Figure S9 Distribution of single radial extracorporeal shockwave therapy evidence

| Energy level                           | Disease or condition                                                    | Outcome                                                                                                     | No of RCTs | T sample | C sample                 | Effect estimate (95%CI)  | CoE                                                                                | Control group intervention                                                      |
|----------------------------------------|-------------------------------------------------------------------------|-------------------------------------------------------------------------------------------------------------|------------|----------|--------------------------|--------------------------|------------------------------------------------------------------------------------|---------------------------------------------------------------------------------|
| High energy                            | <b>Large or Moderate Positive Effect with Low Certainty</b>             |                                                                                                             |            |          |                          |                          |                                                                                    |                                                                                 |
|                                        | <b>Post-stroke upper limb spasticity</b>                                |                                                                                                             |            |          |                          |                          |                                                                                    |                                                                                 |
|                                        | rESWT vs SESWT                                                          | Pain intensity (Visual Analogue Scale)                                                                      | 1          | 17       | 17                       | SMD=-0.91 [-1.63, -0.20] | low                                                                                | SESWT: shockwave of the same sound without energy stimulation                   |
|                                        | <b>Frozen shoulder</b>                                                  |                                                                                                             |            |          |                          |                          |                                                                                    |                                                                                 |
|                                        | rESWT vs RH                                                             | Pain intensity (Visual Analogue Scale)                                                                      | 1          | 34       | 34                       | SMD=-1.65 [-2.20, -1.09] | low                                                                                | RH: medium-frequency electrotherapy                                             |
|                                        | <b>Myofascial pain syndrome</b>                                         |                                                                                                             |            |          |                          |                          |                                                                                    |                                                                                 |
|                                        | rESWT vs RH                                                             | Pain intensity (Visual Analogue Scale)                                                                      | 1          | 22       | 23                       | SMD=-0.73 [-1.34, -0.13] | low                                                                                | RH: ultrasound therapy and hot pack therapy                                     |
|                                        | rESWT vs RH                                                             | Pain intensity (Pain Pressure Threshold)                                                                    | 1          | 22       | 23                       | SMD=0.79 [0.18, 1.40]    | low                                                                                |                                                                                 |
|                                        | <b>Knee osteoarthritis</b>                                              |                                                                                                             |            |          |                          |                          |                                                                                    |                                                                                 |
|                                        | rESWT vs SESWT                                                          | Pain intensity (Visual Analogue Scale)                                                                      | 1          | 20       | 40                       | SMD=-2.25 [-2.93, -1.57] | low                                                                                | SESWT: shockwave of the same sound without energy stimulation                   |
| rESWT vs DI                            | Pain intensity (Visual Analogue Scale)                                  | 1                                                                                                           | 20         | 40       | SMD=-1.72 [-2.35, -1.10] | low                      | DI: corticosteroids                                                                |                                                                                 |
| <b>Lateral epicondylitis</b>           |                                                                         |                                                                                                             |            |          |                          |                          |                                                                                    |                                                                                 |
| rESWT vs RH                            | Pain intensity (Visual Analogue Scale)                                  | 3                                                                                                           | 75         | 78       | SMD=-2.42 [-4.47, -0.37] | low                      | RH: ultrasound therapy or kinesiology taping                                       |                                                                                 |
| <b>Plantar fasciitis</b>               |                                                                         |                                                                                                             |            |          |                          |                          |                                                                                    |                                                                                 |
| rESWT vs RH + MT                       | Pain intensity (Visual Analogue Scale)                                  | 1                                                                                                           | 30         | 30       | SMD=-1.54 [-2.12, -0.95] | low                      | RH: stretching exercises; MT: diclofenac                                           |                                                                                 |
| Medium energy                          | <b>Large or Moderate Positive Effect with Moderate Certainty</b>        |                                                                                                             |            |          |                          |                          |                                                                                    |                                                                                 |
|                                        | <b>Plantar fasciitis</b>                                                |                                                                                                             |            |          |                          |                          |                                                                                    |                                                                                 |
|                                        | rESWT vs RH                                                             | Pain intensity (Visual Analogue Scale)                                                                      | 9          | 315      | 293                      | SMD=-0.70 [-1.31, -0.08] | moderate                                                                           | RH: ultrasound therapy or kinesiology taping or foot orthotics or laser therapy |
|                                        | <b>Knee osteoarthritis</b>                                              |                                                                                                             |            |          |                          |                          |                                                                                    |                                                                                 |
|                                        | rESWT vs SESWT                                                          | Pain intensity (Visual Analogue Scale)                                                                      | 4          | 175      | 181                      | SMD=-1.68 [-2.01, -1.36] | moderate                                                                           | SESWT: shockwave of the same sound without energy stimulation                   |
|                                        | rESWT vs SESWT                                                          | Pain intensity, stiffness and physical function (Western Ontario and McMaster Universities Arthritis Index) | 4          | 175      | 181                      | SMD=-1.15 [-1.61, -0.69] | moderate                                                                           |                                                                                 |
|                                        | rESWT vs SESWT                                                          | Symptom (Lequesne Index)                                                                                    | 4          | 175      | 181                      | SMD=-1.05 [-1.57, -0.54] | moderate                                                                           |                                                                                 |
|                                        | rESWT vs MT                                                             | Pain intensity (Visual Analogue Scale)                                                                      | 4          | 201      | 200                      | SMD=-1.63 [-2.32, -0.93] | moderate                                                                           |                                                                                 |
|                                        | rESWT vs MT                                                             | Pain intensity, stiffness and physical function (Western Ontario and McMaster Universities Arthritis Index) | 3          | 174      | 174                      | SMD=-2.43 [-4.16, -0.70] | moderate                                                                           | MT: etoricoxib or celecoxib                                                     |
|                                        | <b>Large or Moderate Positive Effect with Low or Very low Certainty</b> |                                                                                                             |            |          |                          |                          |                                                                                    |                                                                                 |
| <b>Proximal hamstring tendinopathy</b> |                                                                         |                                                                                                             |            |          |                          |                          |                                                                                    |                                                                                 |
| rESWT vs RH + MT                       | Pain intensity (Visual Analogue Scale)                                  | 1                                                                                                           | 20         | 20       | SMD=-2.65 [-3.54, -1.75] | low                      | RH: physiotherapy and a exercise program; MT: nonsteroidal anti-inflammatory drugs |                                                                                 |
| rESWT vs RH + MT                       | Pain intensity (Nirschl Phase Rating Scale)                             | 1                                                                                                           | 20         | 20       | SMD=-2.70 [-3.21, -2.19] | low                      |                                                                                    |                                                                                 |
| <b>Myofascial pain syndrome</b>        |                                                                         |                                                                                                             |            |          |                          |                          |                                                                                    |                                                                                 |
| rESWT vs RH                            | Pain intensity (Visual Analogue Scale)                                  | 1                                                                                                           | 22         | 23       | SMD=-1.71 [-2.41, -1.02] | low                      | RH: ultrasound therapy                                                             |                                                                                 |
| rESWT vs TCMET                         | Pain intensity (Visual Analogue Scale)                                  | 4                                                                                                           | 137        | 133      | SMD=-0.70 [-1.06, -0.34] | low                      | TCMET: dry needling or tuina or electro-acupuncture                                |                                                                                 |
| <b>Low back pain</b>                   |                                                                         |                                                                                                             |            |          |                          |                          |                                                                                    |                                                                                 |
| rESWT vs SESWT                         | Pain intensity (Visual Analogue Scale)                                  | 2                                                                                                           | 78         | 66       | SMD=-1.85 [-2.82, -0.87] | low                      | SESWT: shockwave of the same sound without energy stimulation                      |                                                                                 |
| rESWT vs SESWT                         | Function (Oswestry Disability Index)                                    | 2                                                                                                           | 78         | 66       | SMD=-2.67 [-4.97, -0.37] | low                      |                                                                                    |                                                                                 |

Medium energy

|                                                          |                                                                                                                                     |   |     |     |                            |          |                                                                                     |
|----------------------------------------------------------|-------------------------------------------------------------------------------------------------------------------------------------|---|-----|-----|----------------------------|----------|-------------------------------------------------------------------------------------|
| <b>Plantar fasciitis</b>                                 |                                                                                                                                     |   |     |     |                            |          |                                                                                     |
| rESWT vs SESWT                                           | Pain intensity (Visual Analogue Scale)                                                                                              | 2 | 94  | 97  | SMD=-13.84 [-22.56, -5.11] | low      | SESWT: shockwave separated by a clasp or without energy stimulation                 |
| rESWT vs RH                                              | Function (Patient Specific Functional Scale)                                                                                        | 1 | 15  | 15  | SMD=-2.87 [-3.93, -1.81]   | low      | RH: ultrasound therapy or kinesiology taping or foot orthotics or laser therapy     |
| <b>Frozen shoulder</b>                                   |                                                                                                                                     |   |     |     |                            |          |                                                                                     |
| rESWT vs SESWT                                           | Pain intensity (Visual Analogue Scale)                                                                                              | 1 | 53  | 53  | SMD=-3.18 [-3.76, -2.60]   | low      | SESWT: shockwave separated by a clasp                                               |
| rESWT vs SESWT                                           | Function (Range of Motion)                                                                                                          | 1 | 53  | 53  | SMD=3.17 [2.59, 3.75]      | low      |                                                                                     |
| rESWT vs DI                                              | Pain intensity (Visual Analogue Scale)                                                                                              | 2 | 70  | 70  | SMD=-0.86 [-1.51, -0.21]   | very low | DI: triamcinolone acetonide or vitamin B12 or mecobalamin or diprospan or lidocaine |
| <b>Patellar tendinopathy</b>                             |                                                                                                                                     |   |     |     |                            |          |                                                                                     |
| rESWT vs RH                                              | Pain intensity (Visual Analogue Scale)                                                                                              | 2 | 96  | 96  | SMD=-3.93 [-5.89, -1.97]   | low      | RH: manual therapy                                                                  |
| rESWT vs RH + MT                                         | Pain intensity (Visual Analogue Scale)                                                                                              | 2 | 182 | 165 | SMD=-1.56 [-2.53, -0.59]   | low      | MT: glucosamine sulfate or celebrex; RH: manual therapy or ultrasound therapy       |
| rESWT vs RH + MT                                         | Symptom (Victorian Institute of Sport Assessment-Patella Questionnaire)                                                             | 1 | 102 | 93  | SMD=5.25 [3.48, 7.01]      | very low |                                                                                     |
| <b>Knee osteoarthritis</b>                               |                                                                                                                                     |   |     |     |                            |          |                                                                                     |
| rESWT vs DI                                              | Pain intensity (Visual Analogue Scale)                                                                                              | 3 | 173 | 173 | SMD=-0.69 [-0.91, -0.47]   | low      | DI: hyaluronic acid or lidocaine or betamethasone                                   |
| rESWT vs DI                                              | Pain intensity, stiffness and physical function (Western Ontario and McMaster Universities Arthritis Index)                         | 2 | 78  | 77  | SMD=-0.79 [-1.38, -0.21]   | low      |                                                                                     |
| rESWT vs DI                                              | Function (Lysholm Score)                                                                                                            | 1 | 37  | 37  | SMD=0.61 [0.14, 1.07]      | very low |                                                                                     |
| rESWT vs MT                                              | Symptom (Lequesne Index)                                                                                                            | 1 | 50  | 50  | SMD=-0.61 [-1.01, -0.21]   | very low | MT: etoricoxib or celecoxib                                                         |
| <b>Chronic prostatitis/ chronic pelvic pain syndrome</b> |                                                                                                                                     |   |     |     |                            |          |                                                                                     |
| rESWT vs SESWT                                           | Pain intensity, urinary symptoms, and quality of life (National Institutes of Health-Chronic Prostatitis Symptom Index Total Score) | 1 | 20  | 20  | SMD=-2.89 [-4.25, -1.53]   | low      | SESWT: shockwave without energy stimulation                                         |
| rESWT vs SESWT                                           | Pain intensity (National Institutes of Health-Chronic Prostatitis Symptom Index Pain Score)                                         | 1 | 20  | 20  | SMD=-2.79 [-4.23, -1.34]   | low      |                                                                                     |
| rESWT vs SESWT                                           | Symptom (National Institutes of Health-Chronic Prostatitis Symptom Index Urinary Score)                                             | 1 | 20  | 20  | SMD=-1.29 [-2.29, -0.30]   | low      |                                                                                     |
| rESWT vs SESWT                                           | Quality of life (National Institutes of Health-Chronic Prostatitis Symptom Index Quality of Life Score)                             | 1 | 20  | 20  | SMD=-2.08 [-2.74, -1.41]   | low      |                                                                                     |
| rESWT vs MT                                              | Pain intensity, urinary symptoms, and quality of life (National Institutes of Health-Chronic Prostatitis Symptom Index Total Score) | 1 | 30  | 15  | SMD=-1.28 [-1.96, -0.60]   | very low |                                                                                     |
| rESWT vs MT                                              | Pain intensity (National Institutes of Health-Chronic Prostatitis Symptom Index Pain Score)                                         | 1 | 30  | 15  | SMD=-1.26 [-1.94, -0.59]   | very low |                                                                                     |
| rESWT vs MT                                              | Symptom (National Institutes of Health-Chronic Prostatitis Symptom Index Urinary Score)                                             | 1 | 30  | 15  | SMD=-0.69 [-1.33, -0.05]   | very low | MT: tamsulosin                                                                      |
| rESWT vs MT                                              | Quality of life (National Institutes of Health-Chronic Prostatitis Symptom Index Quality of Life Score)                             | 1 | 30  | 15  | SMD=-0.88 [-1.53, -0.23]   | very low | RH: thermal therapy                                                                 |
| rESWT vs MT                                              | Pain intensity (Visual Analogue Scale)                                                                                              | 1 | 30  | 15  | SMD=-1.13 [-1.80, -0.47]   | very low |                                                                                     |
| rESWT vs RH                                              | Pain intensity, urinary symptoms, and quality of life (National Institutes of Health-Chronic Prostatitis Symptom Index Total Score) | 1 | 49  | 49  | SMD=-1.49 [-1.94, -1.04]   | very low |                                                                                     |
| rESWT vs RH                                              | Pain intensity (Visual Analogue Scale)                                                                                              | 1 | 49  | 49  | SMD=-0.68 [-1.09, -0.28]   | very low |                                                                                     |
| <b>Coccydynia</b>                                        |                                                                                                                                     |   |     |     |                            |          |                                                                                     |
| rESWT vs RH                                              | Pain intensity (Visual Analogue Scale)                                                                                              | 1 | 20  | 21  | SMD=0.74 [-1.19, -0.29]    | very low | RH: interferential current therapy and short-wave diathermy                         |
| <b>Stenosing tenosynovitis</b>                           |                                                                                                                                     |   |     |     |                            |          |                                                                                     |
| rESWT vs MT                                              | Pain intensity (Visual Analogue Scale)                                                                                              | 2 | 70  | 70  | SMD=-1.52 [-2.27, -0.77]   | very low | MT: indomethacin                                                                    |
| rESWT vs MT                                              | Function (Cooney Score)                                                                                                             | 2 | 70  | 70  | SMD=1.47 [1.09, 1.84]      | very low |                                                                                     |
| <b>Achilles tendinopathy</b>                             |                                                                                                                                     |   |     |     |                            |          |                                                                                     |
| rESWT vs RH                                              | Pain intensity (Numerical Rating Scale)                                                                                             | 1 | 25  | 25  | SMD=-0.86 [-1.44, -0.27]   | very low | RH: eccentric exercises                                                             |
| rESWT vs RH                                              | Symptom (Victorian Institute of Sport Assessment-Achilles Questionnaire)                                                            | 1 | 25  | 25  | SMD=1.40 [0.78, 2.03]      | very low |                                                                                     |

|                                            |                                                                                                             |                                                                          |    |     |                          |                          |                                               |                                                                                                                                  |  |
|--------------------------------------------|-------------------------------------------------------------------------------------------------------------|--------------------------------------------------------------------------|----|-----|--------------------------|--------------------------|-----------------------------------------------|----------------------------------------------------------------------------------------------------------------------------------|--|
| Medium energy                              | rESWT vs RH                                                                                                 | Pain intensity (Pain Pressure Threshold)                                 | 1  | 22  | 23                       | SMD=1.06 [0.47, 1.66]    | very low                                      | RH: eccentric exercises                                                                                                          |  |
|                                            | Small Effect with Low or Very low Certainty                                                                 |                                                                          |    |     |                          |                          |                                               |                                                                                                                                  |  |
|                                            | <b>Plantar heel pain</b>                                                                                    |                                                                          |    |     |                          |                          |                                               |                                                                                                                                  |  |
|                                            | rESWT vs SESWT                                                                                              | Pain intensity (Numerical Rating Scale)                                  | 1  | 125 | 118                      | SMD=-0.29 [-0.55, -0.04] | low                                           | SESWT: shockwave of the same sound without energy stimulation                                                                    |  |
|                                            | <b>Carpal tunnel syndrome</b>                                                                               |                                                                          |    |     |                          |                          |                                               |                                                                                                                                  |  |
|                                            | rESWT vs UC                                                                                                 | Pain intensity (Visual Analogue Scale)                                   | 1  | 26  | 23                       | SMD=0.35 [0.06, 0.63]    | very low                                      | UC: splint therapy                                                                                                               |  |
|                                            | <b>Plantar fasciitis</b>                                                                                    |                                                                          |    |     |                          |                          |                                               |                                                                                                                                  |  |
|                                            | rESWT vs RH                                                                                                 | Function (Foot Function Index)                                           | 1  | 40  | 40                       | SMD=0.33 [0.05, 0.62]    | very low                                      | RH: ultrasound therapy or kinesiology taping or foot orthotics or laser therapy                                                  |  |
|                                            | Large or Moderate Negative Effect with Low or Very low Certainty                                            |                                                                          |    |     |                          |                          |                                               |                                                                                                                                  |  |
|                                            | <b>Achilles tendinopathy</b>                                                                                |                                                                          |    |     |                          |                          |                                               |                                                                                                                                  |  |
| rESWT vs SESWT                             | Pain intensity, function and alignment (American Orthopedic Foot and Ankle Society Score)                   | 1                                                                        | 22 | 23  | SMD=-0.95 [-1.57, -0.33] | low                      | SESWT: shockwave without energy stimulation   |                                                                                                                                  |  |
| <b>Cervical spondylotic radiculopathy</b>  |                                                                                                             |                                                                          |    |     |                          |                          |                                               |                                                                                                                                  |  |
| rESWT vs TCMET                             | Function (Neck Disability Index)                                                                            | 1                                                                        | 29 | 31  | SMD=0.76 [0.23, 1.28]    | very low                 | TCMET: tuina                                  |                                                                                                                                  |  |
| <b>Calcific tendinitis of the shoulder</b> |                                                                                                             |                                                                          |    |     |                          |                          |                                               |                                                                                                                                  |  |
| rESWT vs DI                                | Function (Constant-Murley Score)                                                                            | 1                                                                        | 30 | 30  | SMD=-1.38 [-1.95, -0.81] | very low                 | DI: betamethasone or lidocaine or ropivacaine |                                                                                                                                  |  |
| rESWT vs DI                                | Function and symptom (Oxford Shoulder Score)                                                                | 1                                                                        | 30 | 30  | SMD=3.59 [2.75, 4.42]    | very low                 |                                               |                                                                                                                                  |  |
| Low energy                                 | Large Positive Effect with Moderate Certainty                                                               |                                                                          |    |     |                          |                          |                                               |                                                                                                                                  |  |
|                                            | <b>Lateral epicondylitis</b>                                                                                |                                                                          |    |     |                          |                          |                                               |                                                                                                                                  |  |
|                                            | rESWT vs RH                                                                                                 | Pain intensity (Visual Analogue Scale)                                   | 5  | 177 | 185                      | SMD=-1.53 [-2.26, -0.81] | moderate                                      | RH: ultrasound therapy or wrist extension splint or exercises                                                                    |  |
|                                            | Large or Moderate Positive Effect with Very low Certainty                                                   |                                                                          |    |     |                          |                          |                                               |                                                                                                                                  |  |
|                                            | <b>Post-stroke upper limb spasticity</b>                                                                    |                                                                          |    |     |                          |                          |                                               |                                                                                                                                  |  |
|                                            | rESWT vs RH                                                                                                 | Symptom (Modified Ashworth Scale)                                        | 1  | 53  | 53                       | SMD=-0.76 [-1.03, -0.48] | low                                           | RH: transcutaneous electrical nerve stimulation                                                                                  |  |
|                                            | rESWT vs RH                                                                                                 | Function (Fugl-Meyer Assessment Scale)                                   | 1  | 53  | 53                       | SMD=0.89 [0.52, 1.27]    | low                                           |                                                                                                                                  |  |
|                                            | <b>Post-stroke shoulder-hand syndrome</b>                                                                   |                                                                          |    |     |                          |                          |                                               |                                                                                                                                  |  |
|                                            | rESWT vs SESWT                                                                                              | Pain intensity (Visual Analogue Scale)                                   | 1  | 17  | 17                       | SMD=-0.90 [-1.31, -0.49] | low                                           | SESWT: shockwave without energy stimulation                                                                                      |  |
|                                            | <b>Achilles tendinopathy</b>                                                                                |                                                                          |    |     |                          |                          |                                               |                                                                                                                                  |  |
|                                            | rESWT vs RH                                                                                                 | Pain intensity (Visual Analogue Scale)                                   | 4  | 138 | 138                      | SMD=-1.05 [-1.41, -0.69] | low                                           | RH: eccentric exercises or ultrashort wave radiation therapy or stability training or stretching exercises or ultrasound therapy |  |
|                                            | rESWT vs NT                                                                                                 | Pain intensity (Numerical Rating Scale)                                  | 1  | 25  | 25                       | SMD=-0.80 [-1.17, -0.42] | low                                           |                                                                                                                                  |  |
|                                            | rESWT vs NT                                                                                                 | Symptom (Victorian Institute of Sport Assessment-Achilles Questionnaire) | 1  | 25  | 25                       | SMD=0.87 [0.49, 1.25]    | low                                           |                                                                                                                                  |  |
|                                            | rESWT vs NT                                                                                                 | Pain intensity (Pain Pressure Threshold)                                 | 1  | 25  | 25                       | SMD=0.72 [0.15, 1.30]    | low                                           |                                                                                                                                  |  |
|                                            | <b>Post-stroke lower limb spasticity</b>                                                                    |                                                                          |    |     |                          |                          |                                               |                                                                                                                                  |  |
|                                            | rESWT vs NT                                                                                                 | Function (Passive Range of Motion)                                       | 2  | 31  | 31                       | SMD=0.86 [0.34, 1.39]    | low                                           |                                                                                                                                  |  |
|                                            | <b>Plantar fasciitis</b>                                                                                    |                                                                          |    |     |                          |                          |                                               |                                                                                                                                  |  |
| rESWT vs SESWT                             | Pain intensity (Visual Analogue Scale)                                                                      | 1                                                                        | 16 | 21  | SMD=-0.51 [-0.80, -0.21] | low                      | SESWT: shockwave without energy stimulation   |                                                                                                                                  |  |
| <b>Knee osteoarthritis</b>                 |                                                                                                             |                                                                          |    |     |                          |                          |                                               |                                                                                                                                  |  |
| rESWT vs SESWT                             | Pain intensity, stiffness and physical function (Western Ontario and McMaster Universities Arthritis Index) | 1                                                                        | 32 | 32  | SMD=-1.57 [-2.13, -1.01] | low                      | SESWT: shockwave without energy stimulation   |                                                                                                                                  |  |
| rESWT vs RH                                | Function (Range of Motion)                                                                                  | 1                                                                        | 20 | 20  | SMD=1.77 [1.03, 2.52]    | low                      | RH: kinesiotherapy                            |                                                                                                                                  |  |

# Low energy

|                                                         |                                                                                                                                     |   |     |     |                          |          |                                                                                                                     |
|---------------------------------------------------------|-------------------------------------------------------------------------------------------------------------------------------------|---|-----|-----|--------------------------|----------|---------------------------------------------------------------------------------------------------------------------|
| rESWT vs DI                                             | Pain intensity (Visual Analogue Scale)                                                                                              | 2 | 82  | 82  | SMD=-1.36 [-1.77, -0.95] | very low |                                                                                                                     |
| rESWT vs DI                                             | Pain intensity, stiffness and physical function (Western Ontario and McMaster Universities Arthritis Index)                         | 2 | 82  | 82  | SMD=-1.16 [-1.49, -0.83] | very low | DI: hyaluronic acid                                                                                                 |
| <b>Lateral epicondylitis</b>                            |                                                                                                                                     |   |     |     |                          |          |                                                                                                                     |
| rESWT vs SESWT                                          | Function and symptom (Patient-Rated Tennis Elbow Evaluation Questionnaire)                                                          | 1 | 29  | 28  | SMD=1.29 [0.89, 1.69]    | low      | SESWT: shockwave with minimal energy stimulation                                                                    |
| rESWT vs DI                                             | Function (Grip Strength)                                                                                                            | 1 | 20  | 19  | SMD=2.18 [1.37, 2.99]    | very low | DI: triamcinolone acetonide and lidocaine                                                                           |
| rESWT vs TCMET                                          | Function (Grip Strength)                                                                                                            | 1 | 23  | 23  | SMD=0.86 [0.25, 1.47]    | very low | TCMET: manual acupuncture                                                                                           |
| <b>Carpal tunnel syndrome</b>                           |                                                                                                                                     |   |     |     |                          |          |                                                                                                                     |
| rESWT vs RH                                             | Function and symptom (Boston Carpal Tunnel Syndrome Questionnaire)                                                                  | 1 | 36  | 36  | SMD=-1.22 [-2.34, -0.10] | very low | RH: ultrasound therapy                                                                                              |
| <b>Myofascial pain syndrome</b>                         |                                                                                                                                     |   |     |     |                          |          |                                                                                                                     |
| rESWT vs DI                                             | Function (Range of Motion)                                                                                                          | 1 | 26  | 29  | SMD=2.06 [1.39, 2.72]    | very low | DI: triamcinolone acetonide and lidocaine and mecobalamin                                                           |
| rESWT vs DI                                             | Function (Oswestry Disability Index)                                                                                                | 1 | 27  | 27  | SMD=-4.52 [-5.55, -3.48] | very low |                                                                                                                     |
| <b>Cerebral palsy spasticity</b>                        |                                                                                                                                     |   |     |     |                          |          |                                                                                                                     |
| rESWT vs SESWT                                          | Symptom (Modified Ashworth Scale)                                                                                                   | 2 | 35  | 35  | SMD=-4.96 [-8.36, -1.56] | very low |                                                                                                                     |
| rESWT vs SESWT                                          | Function (Range of Motion)                                                                                                          | 2 | 35  | 35  | SMD=4.51 [1.31, 7.71]    | very low | SESWT: shockwave of the same sound without energy stimulation                                                       |
| rESWT vs SESWT                                          | Structure (Plantar Surface Area)                                                                                                    | 1 | 10  | 10  | SMD=4.48 [3.64, 5.32]    | very low |                                                                                                                     |
| <b>Chronic prostatitis/chronic pelvic pain syndrome</b> |                                                                                                                                     |   |     |     |                          |          |                                                                                                                     |
| rESWT vs MT                                             | Pain intensity, urinary symptoms, and quality of life (National Institutes of Health-Chronic Prostatitis Symptom Index Total Score) | 3 | 83  | 70  | SMD=-1.74 [-2.78, -0.70] | very low |                                                                                                                     |
| rESWT vs MT                                             | Pain intensity (National Institutes of Health-Chronic Prostatitis Symptom Index Pain Score)                                         | 1 | 33  | 30  | SMD=-3.52 [-4.56, -2.49] | very low | MT: α-blocker or nonsteroidal anti-inflammatory drugs or celecoxib or tamsulosin or antibiotics or muscle relaxants |
| rESWT vs MT                                             | Symptom (National Institutes of Health-Chronic Prostatitis Symptom Index Urinary Score)                                             | 1 | 33  | 30  | SMD=-0.44 [-0.73, -0.15] | very low |                                                                                                                     |
| rESWT vs MT                                             | Quality of life (National Institutes of Health-Chronic Prostatitis Symptom Index Quality of Life Score)                             | 1 | 33  | 30  | SMD=-3.29 [-4.92, -1.67] | very low |                                                                                                                     |
| <b>Stenosing tenosynovitis</b>                          |                                                                                                                                     |   |     |     |                          |          |                                                                                                                     |
| rESWT vs RH                                             | Function (Cooney Score)                                                                                                             | 1 | 36  | 36  | SMD=2.09 [1.51, 2.67]    | very low |                                                                                                                     |
| rESWT vs RH                                             | Function (Range of Motion)                                                                                                          | 1 | 32  | 32  | SMD=2.09 [1.51, 2.67]    | very low | RH: ultrashort wave radiation therapy or light therapy                                                              |
| rESWT vs MT                                             | Pain intensity (Visual Analogue Scale)                                                                                              | 3 | 104 | 102 | SMD=-1.29 [-2.54, -0.05] | very low |                                                                                                                     |
| rESWT vs MT                                             | Function (Cooney Score)                                                                                                             | 2 | 74  | 72  | SMD=1.76 [0.15, 3.38]    | very low | MT: diclofenac or indometacin                                                                                       |
| rESWT vs TCMET                                          | Pain intensity (Visual Analogue Scale)                                                                                              | 1 | 30  | 30  | SMD=-1.18 [-1.73, -0.62] | very low |                                                                                                                     |
| rESWT vs TCMET                                          | Function (Cooney Score)                                                                                                             | 1 | 30  | 30  | SMD=1.14 [0.60, 1.69]    | very low | TCMET: tuina                                                                                                        |
| <b>Plantar heel pain</b>                                |                                                                                                                                     |   |     |     |                          |          |                                                                                                                     |
| rESWT + TCMET vs MT                                     | Pain intensity (Visual Analogue Scale)                                                                                              | 1 | 30  | 30  | SMD=-0.59 [-1.11, -0.07] | very low | TCMET: tuina; MT: celecoxib                                                                                         |
| rESWT vs DI                                             | Pain intensity (Visual Analogue Scale)                                                                                              | 1 | 40  | 40  | SMD=-1.65 [-2.24, -1.05] | very low | DI: triamcinolone acetonide and mecobalamin and lidocaine                                                           |
| rESWT vs TCMET                                          | Function (Maryland Foot Score)                                                                                                      | 1 | 39  | 36  | SMD=0.86 [0.17, 1.56]    | very low | TCMET: small needle-knife therapy                                                                                   |
| rESWT vs TCMET + DI                                     | Pain intensity (Numerical Rating Scale)                                                                                             | 1 | 32  | 32  | SMD=1.86 [0.78, 2.95]    | very low | TCMET: small needle-knife therapy; DI: triamcinolone acetonide and lidocaine                                        |
| rESWT vs TCMET + DI                                     | Pain intensity (Visual Analogue Scale)                                                                                              | 1 | 38  | 38  | SMD=-2.09 [-3.47, -0.71] | very low | TCMET: small needle-knife therapy; DI: betamethasone and lidocaine                                                  |
| rESWT vs TCMET + DI                                     | Quality of life (36-item Short-Form)                                                                                                | 1 | 38  | 38  | SMD=1.69 [1.18, 2.19]    | very low |                                                                                                                     |
| <b>Osgood-schlatter disease</b>                         |                                                                                                                                     |   |     |     |                          |          |                                                                                                                     |
| rESWT vs RH                                             | Pain intensity (Visual Analogue Scale)                                                                                              | 1 | 30  | 30  | SMD=-1.84 [-2.45, -1.23] | very low | RH: ultrasound diathermy                                                                                            |
| <b>Calcific tendinitis of the shoulder</b>              |                                                                                                                                     |   |     |     |                          |          |                                                                                                                     |

**Low energy**

|                                                                  |                                                                                           |   |    |    |                          |          |                                                                                              |
|------------------------------------------------------------------|-------------------------------------------------------------------------------------------|---|----|----|--------------------------|----------|----------------------------------------------------------------------------------------------|
| rESWT vs TCMET                                                   | Pain intensity (Visual Analogue Scale)                                                    | 1 | 60 | 60 | SMD=-1.09 [-1.46, -0.71] | very low | TCMET: electro-acupuncture                                                                   |
| rESWT vs TCMET                                                   | Function (Constant-Murley Score)                                                          | 1 | 60 | 60 | SMD=0.80 [0.31, 1.28]    | very low |                                                                                              |
| <b>Patellar tendinopathy</b>                                     |                                                                                           |   |    |    |                          |          |                                                                                              |
| rESWT vs TCMET + RH                                              | Pain intensity (Visual Analogue Scale)                                                    | 1 | 63 | 63 | SMD=-5.54 [-7.22, -3.86] | very low | TCMET: acupuncture or tuina; RH: ultrasound therapy or microwave therapy or infrared therapy |
| rESWT vs MT                                                      | Pain intensity (Visual Analogue Scale)                                                    | 1 | 48 | 48 | SMD=-7.25 [-8.37, -6.12] | very low |                                                                                              |
| <b>Pes anserine tendinopathy</b>                                 |                                                                                           |   |    |    |                          |          |                                                                                              |
| rESWT vs DI                                                      | Pain intensity (Visual Analogue Scale)                                                    | 1 | 73 | 73 | SMD=-1.00 [-1.35, -0.66] | very low | DI: triamcinolone acetone and lidocaine                                                      |
| <b>Diabetic foot ulcers</b>                                      |                                                                                           |   |    |    |                          |          |                                                                                              |
| rESWT vs MT                                                      | Pain intensity (Visual Analogue Scale)                                                    | 1 | 33 | 33 | SMD=-4.56 [-5.50, -3.63] | very low | MT: routine medication                                                                       |
| <b>Bone marrow edema</b>                                         |                                                                                           |   |    |    |                          |          |                                                                                              |
| rESWT vs MT                                                      | Pain intensity (Visual Analogue Scale)                                                    | 1 | 20 | 20 | SMD=-1.91 [-2.67, -1.15] | very low | MT: diclofenac and alendronate                                                               |
| rESWT vs MT                                                      | Pain intensity, function and alignment (American Orthopedic Foot and Ankle Society Score) | 1 | 20 | 20 | SMD=1.42 [0.72, 2.13]    | very low |                                                                                              |
| <b>Small Effect with Low Certainty</b>                           |                                                                                           |   |    |    |                          |          |                                                                                              |
| <b>Lateral epicondylitis</b>                                     |                                                                                           |   |    |    |                          |          |                                                                                              |
| rESWT vs SESWT                                                   | Function (Grip Strength)                                                                  | 2 | 54 | 53 | SMD=0.47 [0.09, 0.86]    | low      | SESWT: shockwave with minimal energy stimulation or without energy stimulation               |
| <b>Large or Moderate Negative Effect with Very low Certainty</b> |                                                                                           |   |    |    |                          |          |                                                                                              |
| <b>Stenosing tenosynovitis</b>                                   |                                                                                           |   |    |    |                          |          |                                                                                              |
| rESWT vs DI                                                      | Pain intensity (Visual Analogue Scale)                                                    | 1 | 30 | 30 | SMD=1.69 [1.27, 2.12]    | very low | DI: dexamethasone and lidocaine                                                              |
| rESWT vs DI                                                      | Function (Cooney Score)                                                                   | 1 | 30 | 30 | SMD=-1.09 [-1.47, -0.70] | very low |                                                                                              |
| <b>Plantar fasciitis</b>                                         |                                                                                           |   |    |    |                          |          |                                                                                              |
| rESWT vs RH                                                      | Pain intensity, function and alignment (American Orthopedic Foot and Ankle Society Score) | 1 | 23 | 23 | SMD=-0.80 [-1.41, -0.20] | very low | RH: deep muscle stimulator                                                                   |
| rESWT vs RH                                                      | Pain intensity and function (Roles and maudslay score)                                    | 1 | 23 | 23 | SMD=0.84 [0.24, 1.45]    | very low |                                                                                              |
| rESWT vs RH                                                      | Function (Foot Function Index)                                                            | 1 | 32 | 32 | SMD=0.66 [0.15, 1.16]    | very low | RH: laser therapy                                                                            |

Note: C, control group; CI, confidence interval; CoE, certainty of evidence assessed using the Grading of Recommendations Assessment, Development and Evaluation approach; DI, drug injection; MT, medication therapy; NT, no treatment; RCTs, randomised controlled trials; rESWT, radial extracorporeal shockwave therapy; RH, rehabilitation; SESWT, sham extracorporeal shockwave therapy; SMD, standardized mean difference; T, treatment group; TCMET, traditional Chinese medicine external therapy; UC, usual care.
