# Supplementary material for: Effectiveness and Safety of Type- and Energy-based Extracorporeal Shockwave Therapy in Clinical Practice: Umbrella Review and Evidence Mapping
Source: bioRxiv or medRxiv preprint supplement (doi:10.1101/2024.01.07.24300948), 2024-01-09
Supplement: Supplementary file [file media-10.pdf]

## Supplementary Figure S10 Distribution of adjunctive focused extracorporeal shockwave therapy evidence

| Energy level                                | Disease or condition                                                    | Outcome                                                                                                     | No of RCTs | T sample | C sample                 | Effect estimate (95%CI)  | CoE                                                                               | Control group intervention                                                                       |
|---------------------------------------------|-------------------------------------------------------------------------|-------------------------------------------------------------------------------------------------------------|------------|----------|--------------------------|--------------------------|-----------------------------------------------------------------------------------|--------------------------------------------------------------------------------------------------|
| High energy                                 | <b>Large or Moderate Positive Effect with Very low Certainty</b>        |                                                                                                             |            |          |                          |                          |                                                                                   |                                                                                                  |
|                                             | <b>Bone marrow edema</b>                                                |                                                                                                             |            |          |                          |                          |                                                                                   |                                                                                                  |
|                                             | fESWT + RH vs RH + MT                                                   | Pain intensity (Visual Analogue Scale)                                                                      | 1          | 40       | 40                       | SMD=-1.51 [-2.02, -1.00] | very low                                                                          | RH: partial weight-bearing gait and walking aids; MT: alendronate and alprostadil                |
|                                             | fESWT + RH vs RH + MT                                                   | Pain intensity, stiffness and physical function (Western Ontario and McMaster Universities Arthritis Index) | 1          | 40       | 40                       | SMD=-1.04 [-1.38, -0.71] | very low                                                                          |                                                                                                  |
|                                             | <b>Frozen shoulder</b>                                                  |                                                                                                             |            |          |                          |                          |                                                                                   |                                                                                                  |
|                                             | fESWT + RH vs RH                                                        | Pain intensity (Visual Analogue Scale)                                                                      | 1          | 42       | 42                       | SMD=-1.39 [-1.87, -0.91] | very low                                                                          | RH: manual therapy                                                                               |
|                                             | <b>Rotator cuff tear</b>                                                |                                                                                                             |            |          |                          |                          |                                                                                   |                                                                                                  |
|                                             | fESWT + RH + TCMET vs RH + TCMET                                        | Pain intensity (Visual Analogue Scale)                                                                      | 1          | 40       | 40                       | SMD=-1.98 [-2.52, -1.43] | very low                                                                          | RH: mobility exercises and transcutaneous electrical nerve stimulation; TCMET: herbal fumigation |
|                                             | fESWT + RH + TCMET vs RH + TCMET                                        | Function (University of California at Los Angeles Shoulder Score)                                           | 1          | 40       | 40                       | SMD=0.62 [0.35, 0.89]    | very low                                                                          |                                                                                                  |
|                                             | fESWT + RH + TCMET vs RH + TCMET                                        | Function (Constant-Murley Score)                                                                            | 1          | 40       | 40                       | SMD=1.35 [0.78, 1.91]    | very low                                                                          |                                                                                                  |
|                                             | <b>Achilles tendinopathy</b>                                            |                                                                                                             |            |          |                          |                          |                                                                                   |                                                                                                  |
|                                             | fESWT + TCMET vs TCMET                                                  | Pain intensity (Visual Analogue Scale)                                                                      | 1          | 60       | 60                       | SMD=-1.61 [-2.18, -1.04] | very low                                                                          | TCMET: electro-acupuncture                                                                       |
|                                             | <b>Plantar fasciitis</b>                                                |                                                                                                             |            |          |                          |                          |                                                                                   |                                                                                                  |
|                                             | fESWT + RH vs RH                                                        | Pain intensity (Visual Analogue Scale)                                                                      | 1          | 30       | 30                       | SMD=-0.74 [-1.27, -0.22] | very low                                                                          | RH: stretching exercises and muscle energy techniques and kinesiology taping                     |
|                                             | fESWT + RH vs RH                                                        | Pain intensity, function and alignment (American Orthopedic Foot and Ankle Society Score)                   | 1          | 30       | 30                       | SMD=1.87 [1.26, 2.49]    | very low                                                                          |                                                                                                  |
|                                             | fESWT + RH vs RH                                                        | Function (Range of Motion)                                                                                  | 1          | 30       | 30                       | SMD=1.11 [0.57, 1.66]    | very low                                                                          |                                                                                                  |
| <b>Osteonecrosis of the femoral head</b>    |                                                                         |                                                                                                             |            |          |                          |                          |                                                                                   |                                                                                                  |
| fESWT + TCMIT + TCMET vs TCMIT + TCMET + MT | Function and symptom (Harris Hip Score)                                 | 1                                                                                                           | 30         | 30       | SMD=0.93 [0.40, 1.47]    | very low                 | TCMIT: yishenqiangguwan; TCMET: warm acupuncture and tuina; MT: calcium carbonate |                                                                                                  |
| fESWT + TCMIT + TCMET vs TCMIT + TCMET + MT | Pain intensity (Visual Analogue Scale)                                  | 1                                                                                                           | 30         | 30       | SMD=-2.31 [-2.97, -1.64] | very low                 |                                                                                   |                                                                                                  |
| fESWT + TCMIT vs TCMIT                      | Function and symptom (Harris Hip Score)                                 | 1                                                                                                           | 35         | 35       | SMD=0.61 [0.33, 0.89]    | very low                 | TCMIT: gugutouhuaisiyujiaonang                                                    |                                                                                                  |
| fESWT + MT vs SESWT + MT                    | Function and symptom (Harris Hip Score)                                 | 1                                                                                                           | 35         | 35       | SMD=0.52 [0.28, 0.77]    | very low                 | SESWT: shockwave with minimal energy stimulation; MT: celecoxib and alendronate   |                                                                                                  |
| fESWT + MT vs SESWT + MT                    | Pain intensity (Visual Analogue Scale)                                  | 1                                                                                                           | 35         | 35       | SMD=-0.77 [-1.46, -0.09] | very low                 |                                                                                   |                                                                                                  |
| Medium energy                               | <b>Moderate Positive Effect with Moderate Certainty</b>                 |                                                                                                             |            |          |                          |                          |                                                                                   |                                                                                                  |
|                                             | <b>Frozen shoulder</b>                                                  |                                                                                                             |            |          |                          |                          |                                                                                   |                                                                                                  |
|                                             | fESWT + RH vs RH                                                        | Pain intensity (Visual Analogue Scale)                                                                      | 4          | 171      | 169                      | SMD=-0.70 [-0.94, -0.46] | moderate                                                                          | RH: short wave diathermy or manual therapy or massage or joint mobilization                      |
|                                             | <b>Large or Moderate Positive Effect with Low or Very low Certainty</b> |                                                                                                             |            |          |                          |                          |                                                                                   |                                                                                                  |
|                                             | <b>Diabetic foot ulcers</b>                                             |                                                                                                             |            |          |                          |                          |                                                                                   |                                                                                                  |
| fESWT + SC vs SC                            | Structure (Wound Surface Area)                                          | 1                                                                                                           | 10         | 11       | SMD=-1.49 [-2.48, -0.50] | low                      | SC: reference to Danish national clinical guidelines                              |                                                                                                  |
| <b>Rotator cuff tendinopathy</b>            |                                                                         |                                                                                                             |            |          |                          |                          |                                                                                   |                                                                                                  |
| fESWT + TCMET vs TCMET                      | Pain intensity (Visual Analogue Scale)                                  | 1                                                                                                           | 40         | 40       | SMD=-5.94 [-8.73, -3.15] | low                      | TCMET: electro-acupuncture                                                        |                                                                                                  |
| fESWT + TCMET vs TCMET                      | Function (Constant-Murley Score)                                        | 1                                                                                                           | 40         | 40       | SMD=1.60 [0.14, 3.05]    | low                      |                                                                                   |                                                                                                  |
| <b>Rotator cuff tear</b>                    |                                                                         |                                                                                                             |            |          |                          |                          |                                                                                   |                                                                                                  |

# Medium energy

|                                                         |                                                                                                                                     |   |    |    |                          |          |                                                                                                                                               |                     |
|---------------------------------------------------------|-------------------------------------------------------------------------------------------------------------------------------------|---|----|----|--------------------------|----------|-----------------------------------------------------------------------------------------------------------------------------------------------|---------------------|
| fESWT + TCMIT +RH vs TCMIT +RH                          | Pain intensity (Visual Analogue Scale)                                                                                              | 1 | 60 | 60 | SMD=-2.20 [-3.40, -1.00] | low      | TCMIT: xujinjiegu decoction; RH: manual therapy and massage                                                                                   |                     |
| fESWT + TCMIT +RH vs TCMIT +RH                          | Function (Constant-Murley Score)                                                                                                    | 1 | 60 | 60 | SMD=1.22 [0.76, 1.67]    | low      |                                                                                                                                               |                     |
| <b>Knee osteoarthritis</b>                              |                                                                                                                                     |   |    |    |                          |          |                                                                                                                                               |                     |
| fESWT + RH vs RH                                        | Pain intensity (Visual Analogue Scale)                                                                                              | 1 | 19 | 28 | SMD=-1.34 [-1.92, -0.75] | low      | RH: muscular strength exercises and ultrasound therapy                                                                                        |                     |
| fESWT + RH vs RH                                        | Symptom (Lequesne Index)                                                                                                            | 1 | 28 | 27 | SMD=-2.23 [-2.91, -1.54] | low      |                                                                                                                                               |                     |
| fESWT + RH vs RH                                        | Function (Range of Motion)                                                                                                          | 1 | 27 | 43 | SMD=0.99 [0.42, 1.55]    | low      |                                                                                                                                               |                     |
| fESWT + DI vs DI                                        | Pain intensity (Visual Analogue Scale)                                                                                              | 1 | 40 | 40 | SMD=-1.07 [-1.54, -0.60] | low      |                                                                                                                                               | DI: hyaluronic acid |
| fESWT + DI vs DI                                        | Symptom (Lequesne Index)                                                                                                            | 1 | 28 | 27 | SMD=-0.58 [-1.03, -0.13] | low      |                                                                                                                                               |                     |
| fESWT + MT vs MT                                        | Pain intensity, stiffness and physical function (Western Ontario and McMaster Universities Arthritis Index)                         | 1 | 27 | 43 | SMD=-1.96 [-2.47, -1.45] | low      | MT: glucosamine                                                                                                                               |                     |
| <b>Post-burn pathological scar</b>                      |                                                                                                                                     |   |    |    |                          |          |                                                                                                                                               |                     |
| fESWT + RH vs SESWT + RH                                | Pain intensity (Numerical Rating Scale)                                                                                             | 2 | 43 | 45 | SMD=-1.13 [-1.58, -0.68] | low      | SESWT: shockwave of the same sound without energy stimulation; RH: comprehensive rehabilitation therapy                                       |                     |
| fESWT + RH vs SESWT + RH                                | Structure (Scar Thickness)                                                                                                          | 2 | 43 | 45 | SMD=-0.75 [-1.19, -0.32] | low      |                                                                                                                                               |                     |
| fESWT + RH vs SESWT + RH                                | Symptom (Transepidermal water loss)                                                                                                 | 1 | 20 | 20 | SMD=-1.61 [-2.33, -0.88] | low      |                                                                                                                                               |                     |
| fESWT + RH vs RH                                        | Pain intensity (Visual Analogue Scale)                                                                                              | 2 | 63 | 65 | SMD=-0.78 [-1.14, -0.42] | low      | RH: comprehensive rehabilitation therapy                                                                                                      |                     |
| fESWT + RH vs RH                                        | Structure (Scar Thickness)                                                                                                          | 1 | 25 | 23 | SMD=-0.94 [-1.54, -0.34] | low      |                                                                                                                                               |                     |
| <b>Chronic prostatitis/chronic pelvic pain syndrome</b> |                                                                                                                                     |   |    |    |                          |          |                                                                                                                                               |                     |
| fESWT + MT vs MT                                        | Pain intensity, urinary symptoms, and quality of life (National Institutes of Health-Chronic Prostatitis Symptom Index Total Score) | 1 | 90 | 90 | SMD=-1.07 [-1.57, -0.57] | low      | MT: $\alpha$ -blocker or nonsteroidal anti-inflammatory drugs or muscle relaxants                                                             |                     |
| fESWT + MT vs MT                                        | Pain intensity (National Institutes of Health-Chronic Prostatitis Symptom Index Pain Score)                                         | 1 | 90 | 90 | SMD=-1.23 [-1.72, -0.74] | low      |                                                                                                                                               |                     |
| fESWT + MT vs MT                                        | Quality of life (National Institutes of Health-Chronic Prostatitis Symptom Index Quality of Life Score)                             | 1 | 90 | 90 | SMD=-0.86 [-1.17, -0.55] | low      |                                                                                                                                               |                     |
| fESWT + MT vs SESWT + MT                                | Pain intensity, urinary symptoms, and quality of life (National Institutes of Health-Chronic Prostatitis Symptom Index Total Score) | 1 | 16 | 15 | SMD=-1.34 [-2.13, -0.55] | very low | SESWT: shockwave without energy stimulation; MT: $\alpha$ -blocker or nonsteroidal anti-inflammatory drugs or antibiotics or muscle relaxants |                     |
| fESWT + MT vs SESWT + MT                                | Pain intensity (National Institutes of Health-Chronic Prostatitis Symptom Index Pain Score)                                         | 1 | 16 | 15 | SMD=-0.85 [-1.59, -0.11] | very low |                                                                                                                                               |                     |
| fESWT + MT vs SESWT + MT                                | Symptom (National Institutes of Health-Chronic Prostatitis Symptom Index Urinary Score)                                             | 1 | 16 | 15 | SMD=-0.95 [-1.70, -0.21] | very low |                                                                                                                                               |                     |
| fESWT + MT vs SESWT + MT                                | Quality of life (National Institutes of Health-Chronic Prostatitis Symptom Index Quality of Life Score)                             | 1 | 16 | 15 | SMD=-1.31 [-2.09, -0.52] | very low |                                                                                                                                               |                     |
| fESWT + MT vs SESWT + MT                                | Pain intensity (Visual Analogue Scale)                                                                                              | 1 | 16 | 15 | SMD=-1.35 [-2.14, -0.56] | very low |                                                                                                                                               |                     |
| <b>Frozen shoulder</b>                                  |                                                                                                                                     |   |    |    |                          |          |                                                                                                                                               |                     |
| fESWT + RH vs RH                                        | Function (Constant-Murley Score)                                                                                                    | 2 | 64 | 64 | SMD=1.53 [1.13, 1.93]    | low      | RH: short wave diathermy or manual therapy or massage or joint mobilization                                                                   |                     |
| fESWT + RH vs RH                                        | Function and pain intensity (Shoulder Pain and Disability Index)                                                                    | 1 | 49 | 49 | SMD=-7.79 [-8.97, -6.61] | very low |                                                                                                                                               |                     |
| fESWT + DI vs DI                                        | Pain intensity (Visual Analogue Scale)                                                                                              | 1 | 60 | 60 | SMD=-1.73 [-2.15, -1.31] | very low | DI: prednisolone and lidocaine                                                                                                                |                     |
| fESWT + DI vs DI                                        | Function (Constant-Murley Score)                                                                                                    | 1 | 60 | 60 | SMD=2.11 [1.66, 2.56]    | very low |                                                                                                                                               |                     |
| fESWT + DI vs DI                                        | Quality of life (Activity of Daily Living Scale)                                                                                    | 1 | 60 | 60 | SMD=5.23 [4.47, 5.99]    | very low |                                                                                                                                               |                     |
| <b>Osteonecrosis of the femoral head</b>                |                                                                                                                                     |   |    |    |                          |          |                                                                                                                                               |                     |
| fESWT + RH vs RH                                        | Function and symptom (Harris Hip Score)                                                                                             | 2 | 61 | 61 | SMD=1.86 [0.97, 2.74]    | very low | RH: hyperbaric oxygen therapy or ozone therapy                                                                                                |                     |
| fESWT + RH vs RH                                        | Pain intensity (Visual Analogue Scale)                                                                                              | 1 | 40 | 40 | SMD=-1.22 [-1.70, -0.74] | very low |                                                                                                                                               |                     |
| fESWT + TCMIT vs TCMIT                                  | Function and symptom (Harris Hip Score)                                                                                             | 1 | 30 | 30 | SMD=4.66 [3.66, 5.66]    | very low | TCMIT: xianlinggubaojiaonang                                                                                                                  |                     |
| fESWT + TCMIT vs TCMIT                                  | Pain intensity (Visual Analogue Scale)                                                                                              | 1 | 30 | 30 | SMD=-2.15 [-2.80, -1.51] | very low |                                                                                                                                               |                     |
| fESWT + TCMIT vs TCMIT                                  | Quality of life (36-item Short-Form)                                                                                                | 1 | 30 | 30 | SMD=0.97 [0.78, 1.16]    | very low | TCMIT: xianlinggubaojiaonang                                                                                                                  |                     |

**Medium energy**

|                                            |                                                                   |   |    |    |                          |          |                                                                                      |  |
|--------------------------------------------|-------------------------------------------------------------------|---|----|----|--------------------------|----------|--------------------------------------------------------------------------------------|--|
| <b>Post-stroke shoulder-hand svndrome</b>  |                                                                   |   |    |    |                          |          |                                                                                      |  |
| fESWT + RH vs RH                           | Pain intensity (Visual Analogue Scale)                            | 1 | 35 | 35 | SMD=-0.65 [-1.13, -0.16] | very low | RH: massage and exercises                                                            |  |
| fESWT + RH vs RH                           | Funtion (Fugl-Meyer Assessment Scale)                             | 1 | 35 | 35 | SMD=1.52 [0.99, 2.06]    | very low |                                                                                      |  |
| fESWT + RH + TCMET vs RH + TCMET           | Pain intensity (Visual Analogue Scale)                            | 2 | 78 | 76 | SMD=-1.06 [-1.40, -0.72] | very low | RH: medium-frequency electrotherapy or mobility exercises; TCMET: manual acupuncture |  |
| fESWT + RH + TCMET vs RH + TCMET           | Funtion (Fugl-Meyer Assessment Scale)                             | 2 | 78 | 76 | SMD=3.03 [2.56, 3.50]    | very low |                                                                                      |  |
| <b>Calcific tendinitis of the shoulder</b> |                                                                   |   |    |    |                          |          |                                                                                      |  |
| fESWT + RH + MT vs RH + MT                 | Pain intensity (Visual Analogue Scale)                            | 1 | 28 | 28 | SMD=-1.55 [-3.03, -0.06] | very low | DI: diclofenac; RH: microwave therapy                                                |  |
| <b>Plantar heel pain</b>                   |                                                                   |   |    |    |                          |          |                                                                                      |  |
| fESWT + TCMET vs TCMET                     | Function (Maryland Foot Score)                                    | 1 | 30 | 30 | SMD=0.91 [0.60, 1.21]    | very low | TCMET: laser needle-knife                                                            |  |
| <b>Carpal tunnel syndrome</b>              |                                                                   |   |    |    |                          |          |                                                                                      |  |
| fESWT + MT + DI vs DI + MT                 | Pain intensity (Visual Analogue Scale)                            | 1 | 20 | 20 | SMD=-0.85 [-1.50, -0.20] | very low |                                                                                      |  |
| fESWT + MT + DI vs DI + MT                 | Funtion and symptom (Boston Carpal Tunnel Syndrome Questionnaire) | 1 | 20 | 20 | SMD=-0.55 [-1.00, -0.11] | very low | MT: mecobalamin; DI: betamethasone                                                   |  |
| fESWT + MT + DI vs DI + MT                 | Quality of life (36-item Short-Form)                              | 1 | 20 | 20 | SMD=0.69 [0.05, 1.33]    | very low |                                                                                      |  |

**Small Effect with Low Certainty**

|                              |                                                                         |   |    |    |                          |     |                         |  |
|------------------------------|-------------------------------------------------------------------------|---|----|----|--------------------------|-----|-------------------------|--|
| <b>Patellar tendinopathy</b> |                                                                         |   |    |    |                          |     |                         |  |
| fESWT + RH vs RH             | Symptom (Victorian Institute of Sport Assessment-Patella Questionnaire) | 1 | 66 | 90 | SMD=-0.34 [-0.66, -0.02] | low | RH: eccentric exercises |  |

**Large or Moderate Positive Effect with Low or Very low Certainty**

**Low energy**

|                                            |                                                                                   |   |    |    |                          |          |                                                                                                                                             |  |
|--------------------------------------------|-----------------------------------------------------------------------------------|---|----|----|--------------------------|----------|---------------------------------------------------------------------------------------------------------------------------------------------|--|
| <b>Erectile dysfunction</b>                |                                                                                   |   |    |    |                          |          |                                                                                                                                             |  |
| fESWT + MT vs MT                           | Function(International Index of Erectile Function-Erectile Function Domain Score) | 1 | 34 | 41 | SMD=0.75 [0.29, 1.21]    | low      | MT: tadalafil                                                                                                                               |  |
| fESWT + RH vs SESWT + RH                   | Function(International Index of Erectile Function-Erectile Function Domain Score) | 1 | 21 | 21 | SMD=1.45 [0.76, 2.13]    | low      | RH: kegel exercises                                                                                                                         |  |
| <b>Calcific tendinitis of the shoulder</b> |                                                                                   |   |    |    |                          |          |                                                                                                                                             |  |
| fESWT + RH vs SESWT + RH                   | Function (Constant-Murley Score)                                                  | 1 | 47 | 41 | SMD=1.54 [1.06, 2.01]    | low      | SESWT: shockwave separated by airchambered polyethylene foil; RH: joint mobilization and traction techniques and massage and manual therapy |  |
| fESWT + RH vs SESWT + RH                   | Pain intensity (Visual Analogue Scale)                                            | 1 | 47 | 41 | SMD=-1.93 [-2.44, -1.42] | low      |                                                                                                                                             |  |
| <b>Post-stroke upper limb spasticity</b>   |                                                                                   |   |    |    |                          |          |                                                                                                                                             |  |
| fESWT + DI vs SESWT + DI                   | Symptom (Modified Ashworth Scale)                                                 | 1 | 32 | 32 | SMD=-0.86 [-1.38, -0.35] | low      | SESWT: shockwave of the same sound without energy stimulation; DI: botulinum toxin type A                                                   |  |
| fESWT + RH + MT vs RH + MT                 | Symptom (Modified Ashworth Scale)                                                 | 2 | 41 | 39 | SMD=-0.86 [-1.32, -0.39] | very low | RH: range of motion exercises or stretching exercises or physical therapy; MT: antispastic medication                                       |  |
| fESWT + RH + MT vs RH + MT                 | Funtion (Passive Range of Motion)                                                 | 2 | 41 | 39 | SMD=0.60 [0.13, 1.06]    | very low |                                                                                                                                             |  |
| <b>Low back pain</b>                       |                                                                                   |   |    |    |                          |          |                                                                                                                                             |  |
| fESWT + RH vs DI + RH                      | Pain intensity (Visual Analogue Scale)                                            | 1 | 27 | 27 | SMD=-1.02 [-1.59, -0.45] | low      | DI: triamcinolone and lidocaine; RH: stretching exercises                                                                                   |  |
| fESWT + RH vs DI + RH                      | Function (Oswestry Disability Index)                                              | 1 | 27 | 27 | SMD=-4.52 [-5.55, -3.48] | low      |                                                                                                                                             |  |
| fESWT + RH vs RH                           | Pain intensity (Visual Analogue Scale)                                            | 1 | 15 | 15 | SMD=-1.34 [-2.14, -0.54] | very low | RH: manual therapy and stretching exercises                                                                                                 |  |
| <b>Carpal tunnel syndrome</b>              |                                                                                   |   |    |    |                          |          |                                                                                                                                             |  |
| fESWT + UC vs SESWT + UC                   | Pain intensity (Visual Analogue Scale)                                            | 1 | 10 | 10 | SMD=-1.43 [-2.21, -0.66] | very low | SESWT: shockwave of the same sound without energy stimulation; UC: wrist splint                                                             |  |
| <b>Diabetic foot ulcers</b>                |                                                                                   |   |    |    |                          |          |                                                                                                                                             |  |
| fESWT + SC vs SC                           | Structure (Wound Surface Area)                                                    | 2 | 49 | 29 | SMD=-0.69 [-1.18, -0.19] | very low | SC: regular dressing or therapeutic footwear or debridement                                                                                 |  |
| <b>Frozen shoulder</b>                     |                                                                                   |   |    |    |                          |          |                                                                                                                                             |  |
| fESWT + TCMET vs TCMET                     | Pain intensity (Visual Analogue Scale)                                            | 1 | 65 | 64 | SMD=-0.68 [-1.03, -0.32] | very low | TCMET: tuina                                                                                                                                |  |

Low energy

|                                             |                                                                                                             |   |    |    |                           |          |                                                                               |  |  |
|---------------------------------------------|-------------------------------------------------------------------------------------------------------------|---|----|----|---------------------------|----------|-------------------------------------------------------------------------------|--|--|
| <b>Rotator cuff tear</b>                    |                                                                                                             |   |    |    |                           |          |                                                                               |  |  |
| fESWT + RH vs RH                            | Pain intensity (Visual Analogue Scale)                                                                      | 1 | 34 | 34 | SMD=-0.53 [-0.81, -0.25]  | very low | RH: comprehensive rehabilitation therapy                                      |  |  |
| <b>Knee osteoarthritis</b>                  |                                                                                                             |   |    |    |                           |          |                                                                               |  |  |
| fESWT + RH vs RH                            | Pain intensity, stiffness and physical function (Western Ontario and McMaster Universities Arthritis Index) | 2 | 19 | 28 | SMD=-0.84 [-1.47, -0.22]  | very low | RH: mobilization with movement or interferential current therapy or exercises |  |  |
| fESWT + RH vs RH                            | Function (Range of Motion)                                                                                  | 2 | 27 | 43 | SMD=1.46 [0.68, 2.24]     | very low |                                                                               |  |  |
| <b>Osteonecrosis of the femoral head</b>    |                                                                                                             |   |    |    |                           |          |                                                                               |  |  |
| fESWT + ST vs ST                            | Function and symptom (Harris Hip Score)                                                                     | 2 | 73 | 79 | SMD=0.50 [0.26, 0.74]     | very low | ST: advanced core decompression or synthetic bone substitutes                 |  |  |
| fESWT + ST vs ST                            | Pain intensity (Visual Analogue Scale)                                                                      | 2 | 73 | 79 | SMD=-0.59 [-0.93, -0.26]  | very low |                                                                               |  |  |
| <b>Breast cancer-related lymphedema</b>     |                                                                                                             |   |    |    |                           |          |                                                                               |  |  |
| fESWT + RH vs RH                            | Function (Range of Motion)                                                                                  | 1 | 30 | 30 | SMD=1.08 [0.55, 1.61]     | very low | RH: complex decongestive therapy                                              |  |  |
| <b>Bone marrow edema</b>                    |                                                                                                             |   |    |    |                           |          |                                                                               |  |  |
| fESWT + TCMIT vs TCMIT                      | Function and symptom (Harris Hip Score)                                                                     | 1 | 20 | 20 | SMD=0.98 [0.35, 1.60]     | very low | TCMIT: yishenhuoxue decoction                                                 |  |  |
| fESWT + TCMIT vs TCMIT                      | Quality of life (36-item Short-Form)                                                                        | 1 | 20 | 20 | SMD=0.83 [0.60, 1.06]     | very low |                                                                               |  |  |
| <b>Proximal hamstring tendinopathy</b>      |                                                                                                             |   |    |    |                           |          |                                                                               |  |  |
| fESWT + RH + TCMET vs RH + TCMET            | Pain intensity (Visual Analogue Scale)                                                                      | 1 | 50 | 50 | SMD=-7.77 [-11.34, -4.20] | very low | RH: medium-frequency electrotherapy; TCMET: electro-acupuncture               |  |  |
| <b>Small Effect with Very low Certainty</b> |                                                                                                             |   |    |    |                           |          |                                                                               |  |  |
| <b>Cerebral palsy spasticity</b>            |                                                                                                             |   |    |    |                           |          |                                                                               |  |  |
| fESWT + RH + TCMET vs RH + TCMET            | Function (Passive Range of Motion)                                                                          | 1 | 28 | 32 | SMD=-0.31 [-0.56, -0.05]  | very low | RH: exercises; TCMET: tuina                                                   |  |  |
| <b>Rotator cuff tear</b>                    |                                                                                                             |   |    |    |                           |          |                                                                               |  |  |
| fESWT + RH vs RH                            | Function (University of California at Los Angeles Shoulder Score)                                           | 1 | 34 | 34 | SMD=0.44 [0.16, 0.72]     | very low |                                                                               |  |  |
| fESWT + RH vs RH                            | Function (Constant-Murley Score)                                                                            | 1 | 34 | 34 | SMD=0.48 [0.20, 0.75]     | very low | RH: comprehensive rehabilitation therapy                                      |  |  |
| fESWT + RH vs RH                            | Function (Range of Motion)                                                                                  | 1 | 34 | 34 | SMD=0.48 [0.20, 0.76]     | very low |                                                                               |  |  |
| <b>Bone marrow edema</b>                    |                                                                                                             |   |    |    |                           |          |                                                                               |  |  |
| fESWT + TCMIT vs TCMIT                      | Pain intensity (Visual Analogue Scale)                                                                      | 1 | 20 | 20 | SMD=-0.48 [-0.79, -0.16]  | very low | TCMIT: yishenhuoxue decoction                                                 |  |  |

Note: C, control group; CI, confidence interval; CoE, certainty of evidence assessed using the Grading of Recommendations Assessment, Development and Evaluation approach; DI, drug injection; fESWT, focused extracorporeal shockwave therapy; MT, medication therapy; RCTs, randomised controlled trials; RH, rehabilitation; SC, standard care; SESWT, sham extracorporeal shockwave therapy; SMD, standardized mean difference; ST, surgical treatment; T, treatment group; TCMET, traditional Chinese medicine external therapy; TCMIT, traditional Chinese medicine internal therapy; UC, usual care.
