# Supplementary material for: Effectiveness and Safety of Type- and Energy-based Extracorporeal Shockwave Therapy in Clinical Practice: Umbrella Review and Evidence Mapping
Source: bioRxiv or medRxiv preprint supplement (doi:10.1101/2024.01.07.24300948), 2024-01-09
Supplement: Supplementary file [file media-12.pdf]

## Supplementary Figure S12 Distribution of single or adjunctive unknown extracorporeal shockwave therapy evidence

| Energy level                             | Disease or condition                                             | Outcome                                                                           | No of RCTs | T sample | C sample                 | Effect estimate (95%CI)  | CoE                                                                                                           | Control group intervention                                                           |
|------------------------------------------|------------------------------------------------------------------|-----------------------------------------------------------------------------------|------------|----------|--------------------------|--------------------------|---------------------------------------------------------------------------------------------------------------|--------------------------------------------------------------------------------------|
| High energy                              | Large or Moderate or Small Effect with Low or Very low Certainty |                                                                                   |            |          |                          |                          |                                                                                                               |                                                                                      |
|                                          | <b>Plantar heel pain</b>                                         |                                                                                   |            |          |                          |                          |                                                                                                               |                                                                                      |
|                                          | ESWT vs SESWT                                                    | Pain intensity (Numerical Rating Scale)                                           | 2          | 126      | 125                      | SMD=-0.28 [-0.53, -0.03] | low                                                                                                           | SESWT: shockwave separated by thin foam or air cushion or without energy stimulation |
|                                          | <b>Myofascial pain syndrome</b>                                  |                                                                                   |            |          |                          |                          |                                                                                                               |                                                                                      |
|                                          | ESWT vs TCMET                                                    | Pain intensity (Visual Analogue Scale)                                            | 1          | 30       | 30                       | SMD=-0.85 [-1.38, -0.32] | very low                                                                                                      | TCMET: manual acupuncture                                                            |
|                                          | <b>Plantar fasciitis</b>                                         |                                                                                   |            |          |                          |                          |                                                                                                               |                                                                                      |
|                                          | ESWT vs DI                                                       | Pain intensity (Visual Analogue Scale)                                            | 1          | 108      | 72                       | SMD=0.37 [0.07, 0.67]    | very low                                                                                                      | DI: methylprednisolone and lidocaine and epinephrine                                 |
|                                          | <b>Stenosing tenosynovitis</b>                                   |                                                                                   |            |          |                          |                          |                                                                                                               |                                                                                      |
| ESWT vs TCMET                            | Pain intensity (Visual Analogue Scale)                           | 1                                                                                 | 12         | 12       | SMD=-1.25 [-2.14, -0.36] | very low                 | TCMET: electro-acupuncture                                                                                    |                                                                                      |
| ESWT + TCMET vs TCMET                    | Pain intensity (Visual Analogue Scale)                           | 1                                                                                 | 12         | 12       | SMD=-1.41 [-2.12, -0.70] | very low                 |                                                                                                               |                                                                                      |
| <b>Osteonecrosis of the femoral head</b> |                                                                  |                                                                                   |            |          |                          |                          |                                                                                                               |                                                                                      |
| ESWT + RH + MT vs RH                     | Quality of life (Modified Barthel Index)                         | 1                                                                                 | 56         | 56       | SMD=1.19 [0.79, 1.59]    | very low                 | RH: hyperbaric oxygen therapy; MT: nonsteroidal antiinflammatory drugs and bisphosphate and calcium carbonate |                                                                                      |
| Medium energy                            | Large or Moderate Effect with Low or Very low Certainty          |                                                                                   |            |          |                          |                          |                                                                                                               |                                                                                      |
|                                          | <b>Plantar heel pain</b>                                         |                                                                                   |            |          |                          |                          |                                                                                                               |                                                                                      |
|                                          | ESWT vs SESWT                                                    | Pain intensity (Numerical Rating Scale)                                           | 2          | 39       | 40                       | SMD=-0.81 [-1.28, -0.35] | low                                                                                                           | SESWT: shockwave of the same sound without energy stimulation                        |
|                                          | <b>Lateral epicondylitis</b>                                     |                                                                                   |            |          |                          |                          |                                                                                                               |                                                                                      |
|                                          | ESWT vs DI                                                       | Pain intensity (Visual Analogue Scale)                                            | 1          | 20       | 20                       | SMD=0.98 [0.32, 1.64]    | low                                                                                                           |                                                                                      |
|                                          | ESWT vs DI                                                       | Function (Grip Strength)                                                          | 1          | 20       | 20                       | SMD=-1.46 [-2.16, -0.75] | low                                                                                                           | DI: methylprednisolone                                                               |
|                                          | <b>Peyronie's disease</b>                                        |                                                                                   |            |          |                          |                          |                                                                                                               |                                                                                      |
|                                          | ESWT vs ST                                                       | Function(International Index of Erectile Function-Erectile Function Domain Score) | 1          | 10       | 10                       | SMD=-1.06 [-2.01, -0.11] | very low                                                                                                      |                                                                                      |
|                                          | ESWT vs ST                                                       | Symptom (Penile Curvature)                                                        | 1          | 10       | 10                       | SMD=-1.08 [-2.03, -0.13] | very low                                                                                                      | ST: autologous perididymal patch grafting                                            |
|                                          | <b>Rotator cuff tear</b>                                         |                                                                                   |            |          |                          |                          |                                                                                                               |                                                                                      |
|                                          | ESWT + RH vs RH                                                  | Function (University of California at Los Angeles Shoulder Score)                 | 1          | 56       | 64                       | SMD=0.61 [0.24, 0.97]    | low                                                                                                           |                                                                                      |
|                                          | ESWT + RH vs RH                                                  | Function (Constant-Murley Score)                                                  | 1          | 56       | 64                       | SMD=1.22 [0.83, 1.62]    | low                                                                                                           |                                                                                      |
|                                          | ESWT + RH vs RH                                                  | Pain intensity (Visual Analogue Scale)                                            | 1          | 56       | 64                       | SMD=-0.96 [-1.78, -0.14] | low                                                                                                           | RH: range of motion exercises and stretching exercises                               |
|                                          | ESWT + RH vs RH                                                  | Function (Range of Motion)                                                        | 1          | 56       | 64                       | SMD=0.82 [0.45, 1.19]    | low                                                                                                           |                                                                                      |
|                                          | ESWT vs TCMET                                                    | Pain intensity (Visual Analogue Scale)                                            | 1          | 15       | 15                       | SMD=1.55 [1.07, 2.03]    | very low                                                                                                      |                                                                                      |
|                                          | ESWT vs TCMET                                                    | Function (Range of Motion)                                                        | 1          | 15       | 15                       | SMD=-2.76 [-4.31, -1.21] | very low                                                                                                      | TCMET: floating acupuncture                                                          |
|                                          | ESWT vs TCMET                                                    | Function (Range of Motion)                                                        | 1          | 15       | 15                       | SMD=-0.66 [-0.91, -0.42] | very low                                                                                                      |                                                                                      |
|                                          | ESWT + TCMET vs TCMET                                            | Pain intensity (Visual Analogue Scale)                                            | 2          | 53       | 53                       | SMD=-1.16 [-2.20, -0.13] | very low                                                                                                      |                                                                                      |
|                                          | ESWT + TCMET vs TCMET                                            | Function (University of California at Los Angeles Shoulder Score)                 | 1          | 26       | 26                       | SMD=5.70 [4.44, 6.97]    | very low                                                                                                      | TCMET: manual acupuncture or floating acupuncture                                    |
|                                          | ESWT + TCMET vs TCMET                                            | Quality of life (36-item Short-Form)                                              | 1          | 26       | 26                       | SMD=1.32 [0.73, 1.92]    | very low                                                                                                      |                                                                                      |
| ESWT + RH +TCMET vs RH + TCMET           | Pain intensity (Visual Analogue Scale)                           | 1                                                                                 | 32         | 32       | SMD=-4.48 [-5.42, -3.54] | very low                 | RH: joint mobilization; TCMET: acupuncture and tuina                                                          |                                                                                      |
| ESWT + RH +TCMET vs RH + TCMET           | Function (Range of Motion)                                       | 1                                                                                 | 32         | 32       | SMD=2.13 [1.35, 2.92]    | very low                 | RH: joint mobilization; TCMET: acupuncture and tuina                                                          |                                                                                      |

Medium energy

|                                                         |                                                                                                                                     |   |     |     |                          |          |                                                                                                                       |  |
|---------------------------------------------------------|-------------------------------------------------------------------------------------------------------------------------------------|---|-----|-----|--------------------------|----------|-----------------------------------------------------------------------------------------------------------------------|--|
| <b>Low back pain</b>                                    |                                                                                                                                     |   |     |     |                          |          |                                                                                                                       |  |
| ESWT vs RH                                              | Pain intensity (Visual Analogue Scale)                                                                                              | 2 | 115 | 115 | SMD=-1.53 [-2.30, -0.76] | low      | RH: bridging exercises or adductor ball squeeze exercises or abdominal marching exercises or reverse curl exercises   |  |
| ESWT vs DI                                              | Pain intensity (Visual Analogue Scale)                                                                                              | 1 | 15  | 15  | SMD=-1.80 [-2.67, -0.93] | very low | DI: trigger point injection                                                                                           |  |
| ESWT + RH vs SESWT + RH                                 | Pain intensity (Visual Analogue Scale)                                                                                              | 1 | 38  | 36  | SMD=-0.88 [-1.36, -0.40] | very low | SESWT: shockwave of the same sound without energy stimulation; RH: physical exercises                                 |  |
| <b>Post-stroke shoulder-hand syndrome</b>               |                                                                                                                                     |   |     |     |                          |          |                                                                                                                       |  |
| ESWT + RH vs RH                                         | Pain intensity (Visual Analogue Scale)                                                                                              | 1 | 58  | 58  | SMD=-1.26 [-1.66, -0.86] | very low |                                                                                                                       |  |
| ESWT + RH vs RH                                         | Function (Fugl-Meyer Assessment Scale)                                                                                              | 1 | 58  | 58  | SMD=1.01 [0.62, 1.40]    | very low | RH: exercises                                                                                                         |  |
| ESWT + RH vs RH                                         | Quality of life (Stroke Specific Quality of Life Scale)                                                                             | 1 | 58  | 58  | SMD=0.69 [0.32, 1.07]    | very low |                                                                                                                       |  |
| ESWT + TCMET + RH vs TCMET + RH                         | Pain intensity (Visual Analogue Scale)                                                                                              | 2 | 70  | 70  | SMD=-0.76 [-1.14, -0.38] | very low |                                                                                                                       |  |
| ESWT + TCMET + RH vs TCMET + RH                         | Function (Fugl-Meyer Assessment Scale)                                                                                              | 2 | 70  | 70  | SMD=0.86 [0.23, 1.49]    | very low | RH: posture exercises or psychotherapy or medium-frequency electrotherapy or barotherapy; TCMET: acupuncture or tuina |  |
| ESWT + TCMET + RH vs TCMET + RH                         | Quality of life (Stroke Specific Quality of Life Scale)                                                                             | 2 | 70  | 70  | SMD=1.11 [0.64, 1.59]    | very low |                                                                                                                       |  |
| <b>Knee osteoarthritis</b>                              |                                                                                                                                     |   |     |     |                          |          |                                                                                                                       |  |
| ESWT vs SESWT                                           | Pain intensity (Visual Analogue Scale)                                                                                              | 1 | 30  | 30  | SMD=-1.73 [-2.33, -1.14] | very low |                                                                                                                       |  |
| ESWT vs SESWT                                           | Pain intensity, stiffness and physical function (Western Ontario and McMaster Universities Arthritis Index)                         | 1 | 30  | 30  | SMD=-0.59 [-1.11, -0.08] | very low | SESWT: shockwave of the same sound without energy stimulation                                                         |  |
| ESWT vs SESWT                                           | Symptom (Lequesne Index)                                                                                                            | 1 | 30  | 30  | SMD=-0.92 [-1.45, -0.39] | very low |                                                                                                                       |  |
| ESWT vs MT                                              | Pain intensity (Visual Analogue Scale)                                                                                              | 1 | 30  | 30  | SMD=-1.84 [-2.45, -1.23] | very low |                                                                                                                       |  |
| ESWT vs MT                                              | Pain intensity, stiffness and physical function (Western Ontario and McMaster Universities Arthritis Index)                         | 1 | 30  | 30  | SMD=-1.56 [-2.15, -0.98] | very low | MT: glucosamine                                                                                                       |  |
| ESWT vs MT                                              | Symptom (Lequesne Index)                                                                                                            | 1 | 30  | 30  | SMD=-1.69 [-2.29, -1.10] | very low |                                                                                                                       |  |
| <b>Frozen shoulder</b>                                  |                                                                                                                                     |   |     |     |                          |          |                                                                                                                       |  |
| ESWT + TCMET vs TCMET                                   | Pain intensity (Visual Analogue Scale)                                                                                              | 1 | 23  | 23  | SMD=-0.62 [-1.21, -0.03] | very low |                                                                                                                       |  |
| ESWT + TCMET vs TCMET                                   | Function (Constant-Murley Score)                                                                                                    | 1 | 23  | 23  | SMD=1.49 [0.83, 2.15]    | very low | TCMET: small needle-knife therapy                                                                                     |  |
| <b>Chronic prostatitis/chronic pelvic pain syndrome</b> |                                                                                                                                     |   |     |     |                          |          |                                                                                                                       |  |
| ESWT + TCMET vs TCMET                                   | Pain intensity, urinary symptoms, and quality of life (National Institutes of Health-Chronic Prostatitis Symptom Index Total Score) | 1 | 14  | 14  | SMD=-1.90 [-2.81, -0.98] | very low |                                                                                                                       |  |
| ESWT + TCMET vs TCMET                                   | Symptom (International Prostatism Symptom Score)                                                                                    | 1 | 14  | 14  | SMD=-1.27 [-2.10, -0.45] | very low | TCMET: herbal fumigation                                                                                              |  |
| ESWT + TCMET vs TCMET                                   | Pain intensity (Visual Analogue Scale)                                                                                              | 1 | 14  | 14  | SMD=-3.59 [-4.84, -2.33] | very low |                                                                                                                       |  |
| <b>Calcific tendinitis of the shoulder</b>              |                                                                                                                                     |   |     |     |                          |          |                                                                                                                       |  |
| ESWT + TCMET + RH vs TCMET + RH                         | Pain intensity (Visual Analogue Scale)                                                                                              | 1 | 16  | 12  | SMD=-2.45 [-3.47, -1.43] | very low |                                                                                                                       |  |
| ESWT + TCMET + RH vs TCMET + RH                         | Function (Constant-Murley Score)                                                                                                    | 1 | 16  | 12  | SMD=1.51 [0.65, 2.37]    | very low | TCMET: manual acupuncture; RH: infrared therapy                                                                       |  |
| ESWT + ST vs ST                                         | Pain intensity (Visual Analogue Scale)                                                                                              | 1 | 30  | 30  | SMD=-3.39 [-4.20, -2.59] | very low |                                                                                                                       |  |
| ESWT + ST vs ST                                         | Function (University of California at Los Angeles Shoulder Score)                                                                   | 1 | 30  | 30  | SMD=3.44 [2.63, 4.25]    | very low | ST: ultrasound-guided puncture decompression                                                                          |  |
| <b>Osteonecrosis of the femoral head</b>                |                                                                                                                                     |   |     |     |                          |          |                                                                                                                       |  |
| ESWT + TCMIT vs TCMIT                                   | Function and symptom (Harris Hip Score)                                                                                             | 1 | 24  | 24  | SMD=1.89 [0.60, 3.18]    | very low | TCMIT: yishenxiaotongwan                                                                                              |  |
| ESWT + RH + MT vs MT                                    | Function and symptom (Harris Hip Score)                                                                                             | 1 | 31  | 31  | SMD=0.61 [0.10, 1.12]    | very low | RH: hyperbaric oxygen therapy; MT: celecoxib                                                                          |  |

Low energy

Large or Moderate Effect with Low or Very low Certainty

|                                           |                                                                                                             |   |     |     |                           |          |  |                                                                                                                     |
|-------------------------------------------|-------------------------------------------------------------------------------------------------------------|---|-----|-----|---------------------------|----------|--|---------------------------------------------------------------------------------------------------------------------|
| <b>Post-stroke shoulder-hand syndrome</b> |                                                                                                             |   |     |     |                           |          |  |                                                                                                                     |
| ESWT + TCMET vs TCMET                     | Pain intensity (Visual Analogue Scale)                                                                      | 1 | 45  | 45  | SMD=-1.32 [-1.78, -0.87]  | low      |  |                                                                                                                     |
| ESWT + TCMET vs TCMET                     | Function (Fugl-Meyer Assessment Scale)                                                                      | 1 | 45  | 45  | SMD=2.45 [1.90, 3.00]     | low      |  | TCMET: manual acupuncture                                                                                           |
| <b>Second-degree burn</b>                 |                                                                                                             |   |     |     |                           |          |  |                                                                                                                     |
| ESWT + SC vs SC                           | Structure (Wound-Healing Time)                                                                              | 1 | 22  | 22  | SMD=-1.45 [-2.12, -0.78]  | low      |  | SC: burn wound debridement and topical antiseptic therapy                                                           |
| ESWT + SC vs SC                           | Structure (Wound Infection Rate)                                                                            | 1 | 22  | 22  | RR=0.67 [0.12, 3.61]      | low      |  |                                                                                                                     |
| <b>Plantar fasciitis</b>                  |                                                                                                             |   |     |     |                           |          |  |                                                                                                                     |
| ESWT vs DI                                | Pain intensity (Visual Analogue Scale)                                                                      | 2 | 203 | 208 | SMD=-1.92 [-3.72, -0.12]  | low      |  | DI: methylprednisolone or lidocaine or betamethasone                                                                |
| <b>Rotator cuff tear</b>                  |                                                                                                             |   |     |     |                           |          |  |                                                                                                                     |
| ESWT + RH vs RH                           | Pain intensity (Visual Analogue Scale)                                                                      | 1 | 30  | 32  | SMD=-0.83 [-1.36, -0.31]  | very low |  | RH: functional training                                                                                             |
| ESWT + RH vs RH                           | Function (Constant-Murley Score)                                                                            | 1 | 30  | 32  | SMD=1.00 [0.47, 1.53]     | very low |  |                                                                                                                     |
| <b>Low back pain</b>                      |                                                                                                             |   |     |     |                           |          |  |                                                                                                                     |
| ESWT vs RH                                | Pain intensity (Visual Analogue Scale)                                                                      | 1 | 35  | 35  | SMD=-0.59 [-1.11, -0.07]  | very low |  | RH: bridging exercises or adductor ball squeeze exercises or abdominal marching exercises or reverse curl exercises |
| ESWT vs RH                                | Function (Oswestry Disability Index)                                                                        | 1 | 50  | 50  | SMD=-0.70 [-1.18, -0.21]  | very low |  |                                                                                                                     |
| ESWT + RH vs RH                           | Pain intensity (Visual Analogue Scale)                                                                      | 1 | 13  | 15  | SMD=-1.17 [-1.98, -0.35]  | very low |  | RH: hot pack therapy and ultrasound therapy and electrotherapy                                                      |
| <b>Stenosing tenosynovitis</b>            |                                                                                                             |   |     |     |                           |          |  |                                                                                                                     |
| ESWT + RH vs RH                           | Function (Cooney Score)                                                                                     | 1 | 41  | 40  | SMD=0.99 [0.67, 1.32]     | very low |  | RH: ultrashort wave electrotherapy                                                                                  |
| <b>Knee osteoarthritis</b>                |                                                                                                             |   |     |     |                           |          |  |                                                                                                                     |
| ESWT vs RH                                | Pain intensity (Visual Analogue Scale)                                                                      | 1 | 35  | 35  | SMD=-1.65 [-2.19, -1.10]  | very low |  |                                                                                                                     |
| ESWT vs RH                                | Pain intensity, stiffness and physical function (Western Ontario and McMaster Universities Arthritis Index) | 1 | 35  | 35  | SMD=-2.13 [-2.72, -1.54]  | very low |  | RH: general exercises                                                                                               |
| ESWT vs RH                                | Symptom (Lequesne Index)                                                                                    | 1 | 35  | 35  | SMD=-1.36 [-1.88, -0.84]  | very low |  |                                                                                                                     |
| <b>Patellar tendinopathy</b>              |                                                                                                             |   |     |     |                           |          |  |                                                                                                                     |
| ESWT vs RH                                | Pain intensity (Visual Analogue Scale)                                                                      | 1 | 38  | 16  | SMD=-4.66 [-7.32, -1.99]  | very low |  | RH: massage                                                                                                         |
| ESWT vs TCMET                             | Pain intensity (Visual Analogue Scale)                                                                      | 1 | 38  | 9   | SMD=-6.92 [-10.37, -3.47] | very low |  | TCMET: acupuncture                                                                                                  |
| ESWT vs DI                                | Pain intensity (Visual Analogue Scale)                                                                      | 1 | 38  | 4   | SMD=5.02 [3.49, 6.55]     | very low |  | DI: prednisone and procaine                                                                                         |
| <b>Carpal tunnel syndrome</b>             |                                                                                                             |   |     |     |                           |          |  |                                                                                                                     |
| ESWT + MT vs MT                           | Function and symptom (Boston Carpal Tunnel Syndrome Questionnaire)                                          | 1 | 47  | 45  | SMD=-2.85 [-3.27, -2.44]  | very low |  | RH: neural mobilization; MT: methylcobalamin                                                                        |
| <b>Frozen shoulder</b>                    |                                                                                                             |   |     |     |                           |          |  |                                                                                                                     |
| ESWT + MT vs RH + MT                      | Pain intensity (Visual Analogue Scale)                                                                      | 1 | 15  | 15  | SMD=-1.65 [-2.50, -0.81]  | very low |  | RH: conservative physical therapy; MT: nonsteroidal anti-inflammatory drugs                                         |
| ESWT + MT vs RH + MT                      | Function (Patient Specific Functional Scale)                                                                | 1 | 15  | 15  | SMD=-2.11 [-3.03, -1.19]  | very low |  |                                                                                                                     |
| ESWT + RH vs RH                           | Pain intensity (Visual Analogue Scale)                                                                      | 2 | 117 | 117 | SMD=-1.74 [-2.85, -0.63]  | very low |  |                                                                                                                     |
| ESWT + RH vs RH                           | Function (Range of motion)                                                                                  | 2 | 117 | 117 | SMD=1.13 [0.90, 1.37]     | very low |  |                                                                                                                     |
| ESWT + RH vs RH                           | Quality of life (36-item Short-Form)                                                                        | 2 | 95  | 95  | SMD=2.00 [1.54, 2.45]     | very low |  | RH: joint mobilization or functional exercises or pulsed radiofrequency                                             |
| ESWT + RH vs RH                           | Function (University of California at Los Angeles Shoulder Score)                                           | 1 | 57  | 57  | SMD=1.25 [0.85, 1.65]     | very low |  |                                                                                                                     |
| ESWT + RH vs RH                           | Function and pain intensity (Shoulder Pain and Disability Index)                                            | 1 | 38  | 38  | SMD=-4.06 [-4.86, -3.26]  | very low |  |                                                                                                                     |
| <b>Decubitus ulceration</b>               |                                                                                                             |   |     |     |                           |          |  |                                                                                                                     |
| ESWT + RH vs RH                           | Structure (Percentage of the wound healing area)                                                            | 1 | 15  | 15  | SMD=1.35 [0.88, 1.82]     | very low |  | RH: infrared polarized light therapy                                                                                |

**Low  
energy**

| <b>Post-stroke upper limb spasticity</b> |                                          |   |    |    |                          |          |                                                     |
|------------------------------------------|------------------------------------------|---|----|----|--------------------------|----------|-----------------------------------------------------|
| ESWT + RH + TCMET vs RH + TCMET          | Function (Fugl-Meyer Assessment Scale)   | 1 | 30 | 30 | SMD=1.20 [0.64, 1.75]    | very low | RH: occupational therapy; TCMET: manual acupuncture |
| ESWT + RH + TCMET vs RH + TCMET          | Quality of life (Modified Barthel Index) | 1 | 30 | 30 | SMD=0.94 [0.40, 1.47]    | very low | RH: occupational therapy; TCMET: manual acupuncture |
| <b>Post-stroke lower limb spasticity</b> |                                          |   |    |    |                          |          |                                                     |
| ESWT + RH vs RH                          | Symptom (Modified Ashworth Scale)        | 1 | 50 | 50 | SMD=-1.21 [-2.02, -0.40] | very low |                                                     |
| ESWT + RH vs RH                          | Function (Fugl-Meyer Assessment Scale)   | 1 | 50 | 50 | SMD=0.62 [0.33, 0.90]    | very low | RH: physiotherapy and exercises                     |

Note: C, control group; CI, confidence interval; CoE, certainty of evidence assessed using the Grading of Recommendations Assessment, Development and Evaluation approach; DI, drug injection; ESWT, extracorporeal shockwave therapy; MT, medication therapy; RCTs, randomised controlled trials; RH, rehabilitation; RR, relative risk; SC, standard care; SESWT, sham extracorporeal shockwave therapy; SMD, standardized mean difference; T, treatment group; TCMET, traditional Chinese medicine external therapy; TCMIT, traditional Chinese medicine internal therapy.
