# Supplementary material for: Effectiveness and Safety of Type- and Energy-based Extracorporeal Shockwave Therapy in Clinical Practice: Umbrella Review and Evidence Mapping
Source: bioRxiv or medRxiv preprint supplement (doi:10.1101/2024.01.07.24300948), 2024-01-09
Supplement: Supplementary file [file media-13.pdf]

**Supplementary Methods S1 Classification of energy level,  
effect size and study conclusion**

Energy level,

Classification of energy level through energy flux density or pressure field.

| Energy level  | Physical parameter  | Specific dosage (mJ/mm <sup>2</sup> or bar) |
|---------------|---------------------|---------------------------------------------|
| High energy   | Energy flux density | $0.28 \leq x < 0.60$                        |
|               | Pressure field      | $x > 2.5$                                   |
| Medium energy | Energy flux density | $0.08 \leq y < 0.28$                        |
|               | Pressure field      | $1.5 \leq y \leq 2.5$                       |
| Low energy    | Energy flux density | $z < 0.08$                                  |
|               | Pressure field      | $z < 1.5$                                   |

Note: x, high energy; y, medium energy; z, low energy.

Effect size,

Classification of effect size through specific scope regarding risk ratio and standardised mean difference.

| Estimated summary effect     | Effect size      | Specific scope       |
|------------------------------|------------------|----------------------|
| Relative risk                | Large            | $a \geq 2.0$         |
|                              |                  | $a \leq 0.5$         |
|                              | Small            | $0.5 < a < 2.0$      |
| Standardized mean difference | Large            | $b \geq 0.8$         |
|                              |                  | $b \leq -0.8$        |
|                              | Moderate         | $0.5 \leq b < 0.8$   |
|                              |                  | $-0.8 < b \leq -0.5$ |
|                              | Small            | $0.2 \leq b < 0.5$   |
|                              |                  | $-0.5 < b \leq -0.2$ |
| Very small                   | $-0.2 < b < 0.2$ |                      |

Note: a, relative risk; b, standardized mean difference.

Study conclusion,

Classification of study conclusion corresponding to each outcome.

| Conclusion class     | Description                                                                                                                                                        |
|----------------------|--------------------------------------------------------------------------------------------------------------------------------------------------------------------|
| Positive             | Results reported a positive effect compared to the control group and conclusion indicated that the intervention was effective.                                     |
| Potentially positive | Results reported a positive or potentially positive effect compared to the control group and conclusion indicated that the intervention was potentially effective. |
| Unclear              | Results reported a effect or not compared to the control group and conclusion did not indicate the intervention.                                                   |
| No effect            | Results reported no effect compared to the control group and conclusion indicated the intervention was invalid.                                                    |
| Potentially negative | Results reported a negative or potentially negative effect compared to the control group and conclusion indicated that the intervention was potentially adverse.   |
| Negative             | Results reported a negative effect compared to the control group and conclusion indicated that the intervention was adverse.                                       |
