# Supplementary material for: Effectiveness and Safety of Type- and Energy-based Extracorporeal Shockwave Therapy in Clinical Practice: Umbrella Review and Evidence Mapping
Source: bioRxiv or medRxiv preprint supplement (doi:10.1101/2024.01.07.24300948), 2024-01-09
Supplement: Supplementary file [file media-14.pdf]

**Supplementary Table S1 Characteristics of included systematic reviews**

| First author / Year  | Country   | Disease or condition        | No of primary studies | No of participants | Outcomes included in SRs                          | Conclusion from SRs  | Quality assessment tool                                                 | GRADE tool |
|----------------------|-----------|-----------------------------|-----------------------|--------------------|---------------------------------------------------|----------------------|-------------------------------------------------------------------------|------------|
| Ju Chan Kim 2019     | Korea     | Carpal tunnel syndrome      | 6                     | 281                | Visual analogue scale                             | Positive             | Cochrane risk of bias tool                                              | not inform |
|                      |           |                             |                       |                    | Boston carpal tunnel questionnaire                | Positive             |                                                                         |            |
|                      |           |                             |                       |                    | Electrodiagnostic parameter                       | Positive             |                                                                         |            |
|                      |           |                             |                       |                    | Roles and maudsley scale                          | Positive             |                                                                         |            |
| Wenhao Li 2020       | China     | Carpal tunnel syndrome      | 5                     | 204                | Visual analogue scale                             | Unclear              | Cochrane risk of bias tool                                              | inform     |
|                      |           |                             |                       |                    | Boston carpal tunnel questionnaire                | Unclear              |                                                                         |            |
|                      |           |                             |                       |                    | Sensory distal latency                            | Unclear              |                                                                         |            |
|                      |           |                             |                       |                    | Motor distal latency                              | Negative             |                                                                         |            |
|                      |           |                             |                       |                    | Compound muscle action potential amplitude        | Positive             |                                                                         |            |
|                      |           |                             |                       |                    | Sensory nerve action potential amplitude          | Positive             |                                                                         |            |
| Yujie Xie 2020       | China     | Carpal tunnel syndrome      | 10                    | 433                | Visual analogue scale                             | Positive             | Cochrane risk of bias tool and<br>Physiotherapy evidence database scale | not inform |
|                      |           |                             |                       |                    | Boston carpal tunnel questionnaire                | Positive             |                                                                         |            |
|                      |           |                             |                       |                    | Electrodiagnostic parameter                       | Unclear              |                                                                         |            |
| Ko-Ta Chen 2022      | China     | Carpal tunnel syndrome      | 7                     | 376                | Boston carpal tunnel questionnaire                | Unclear              | Cochrane risk of bias tool                                              | not inform |
|                      |           |                             |                       |                    | Visual analogue scale                             | Unclear              |                                                                         |            |
|                      |           |                             |                       |                    | Distal motor latency of median nerve              | Unclear              |                                                                         |            |
|                      |           |                             |                       |                    | Sensory nerve conduction velocity                 | Unclear              |                                                                         |            |
| Qiangru Huang 2020   | China     | Diabetic foot ulcers        | 8                     | 339                | Wound healing area                                | Positive             | Cochrane risk of bias tool                                              | not inform |
|                      |           |                             |                       |                    | Complete cure rate                                | Positive             |                                                                         |            |
|                      |           |                             |                       |                    | Percentage of re-epithelialization                | Positive             |                                                                         |            |
| Zaid Munir 2023      | the UK    | Peripheral arterial disease | 4                     | 228                | Pain-free walking distance                        | Positive             | Cochrane risk of bias tool                                              | not inform |
|                      |           |                             |                       |                    | Maximum walking distance                          | Positive             |                                                                         |            |
|                      |           |                             |                       |                    | Ankle brachial pressure index                     | Unclear              |                                                                         |            |
|                      |           |                             |                       |                    | Degree of arterial stenosis                       | Positive             |                                                                         |            |
| L Bisset 2005        | Australia | Lateral epicondylitis       | 2                     | 317                | Visual analogue scale                             | No effect            | Physiotherapy evidence database scale                                   | not inform |
|                      |           |                             |                       |                    | Grip strength                                     | No effect            |                                                                         |            |
|                      |           |                             |                       |                    | Global improvement                                | No effect            |                                                                         |            |
| Christoph Weber 2015 | Germany   | Lateral epicondylitis       | 4                     | 327                | Overall pain relief                               | Potentially positive | Sign checklist                                                          | not inform |
|                      |           |                             |                       |                    | Pain relief during maximum handgrip strength test | Potentially positive |                                                                         |            |
|                      |           |                             |                       |                    | Grip strength                                     | Potentially positive |                                                                         |            |
| Eli T. Sayegh 2015   | the USA   | Lateral epicondylitis       | 7                     | 641                | Patient-rated tennis elbow evaluation             | No effect            | 22-point consolidated standards of<br>reporting trials checklist        | not inform |
|                      |           |                             |                       |                    | Pain-free function index                          | No effect            |                                                                         |            |
|                      |           |                             |                       |                    | Overall function                                  | No effect            |                                                                         |            |
|                      |           |                             |                       |                    | Disabilities of the arm, shoulder and hand score  | No effect            |                                                                         |            |

|                          |         |                       |    |            |                                                  |                      |                                            |            |
|--------------------------|---------|-----------------------|----|------------|--------------------------------------------------|----------------------|--------------------------------------------|------------|
|                          |         |                       |    |            | EuroQol five dimensions questionnaire            | No effect            |                                            |            |
|                          |         |                       |    |            | Grip strength                                    | No effect            |                                            |            |
|                          |         |                       |    |            | Pain-free walking distance                       | No effect            |                                            |            |
| Yuan Xiong 2019          | China   | Lateral epicondylitis | 4  | 237        | Grip strength                                    | Positive             | Cochrane risk of bias tool                 | not inform |
|                          |         |                       |    |            | Visual analogue scale                            | Positive             |                                            |            |
| Gaowen Yao 2020          | China   | Lateral epicondylitis | 13 | 1035       | Grip strength                                    | Positive             | Cochrane risk of bias tool                 | not inform |
|                          |         |                       |    |            | Visual analogue scale                            | Positive             |                                            |            |
| Seo Yeon Yoon 2020       | Korea   | Lateral epicondylitis | 12 | 1104       | Grip strength                                    | No effect            | Cochrane risk of bias tool                 | not inform |
|                          |         |                       |    |            | Visual analogue scale                            | No effect            |                                            |            |
| Punam Patel 2018         | the USA | Lateral epicondylitis | 5  | not inform | Visual analogue scale                            | Positive             | Physiotherapy evidence database scale      | not inform |
|                          |         |                       |    |            | Grip strength                                    | No effect            |                                            |            |
| Yun J. Kim 2021          | the USA | Lateral epicondylitis | 6  | 481        | Pain reduction                                   | Unclear              | Cochrane risk of bias tool                 | not inform |
|                          |         |                       |    |            | Grip Strength                                    | Unclear              |                                            |            |
|                          |         |                       |    |            | Patient-reported tennis elbow evaluation         | Unclear              |                                            |            |
|                          |         |                       |    |            | Disabilities of the arm, shoulder and hand score | Unclear              |                                            |            |
| Amarpal S. Cheema 2023   | Canada  | Lateral epicondylitis | 2  | 129        | Visual analogue scale                            | No effect            | Cochrane risk of bias tool                 | inform     |
|                          |         |                       |    |            | Disabilities of the arm, shoulder and hand score | No effect            |                                            |            |
| Chenchen Yan 2019        | China   | Lateral epicondylitis | 5  | 233        | Visual analogue scale                            | Positive             | Cochrane risk of bias tool and Jadad score | not inform |
|                          |         |                       |    |            | Grip Strength                                    | Positive             |                                            |            |
|                          |         |                       |    |            | Elbow function evaluation score                  | Unclear              |                                            |            |
| Chenxiao Zheng 2020      | China   | Lateral epicondylitis | 9  | 715        | Visual analogue scale                            | No effect            | Jadad score                                | not inform |
|                          |         |                       |    |            | Pain reduction                                   | Positive             |                                            |            |
|                          |         |                       |    |            | Thomsen test                                     | Unclear              |                                            |            |
|                          |         |                       |    |            | Grip strength                                    | Positive             |                                            |            |
| Stefanos Karanasios 2021 | Greece  | Lateral epicondylitis | 27 | 1871       | Grip strength                                    | Unclear              | Physiotherapy evidence database scale      | inform     |
|                          |         |                       |    |            | Visual analogue scale                            | Unclear              |                                            |            |
| Zongye Zhong 2018        | China   | Lateral epicondylitis | 10 | 928        | Visual analogue scale                            | Positive             | Cochrane risk of bias tool                 | not inform |
|                          |         |                       |    |            | Grip strength                                    | Positive             |                                            |            |
| Yunfei Yuan 2023         | China   | Lateral epicondylitis | 10 | 646        | Visual analogue scale                            | Positive             | Cochrane risk of bias tool                 | not inform |
|                          |         |                       |    |            | Grip strength                                    | Potentially positive |                                            |            |
|                          |         |                       |    |            | Incidence of recurrence                          | Potentially positive |                                            |            |
|                          |         |                       |    |            | Upper limb function score                        | Potentially positive |                                            |            |
| Shuai Wang 2015          | China   | Lateral epicondylitis | 5  | 389        | Visual analogue scale                            | Unclear              | Jadad score                                | not inform |
| Zhengan Hao 2015         | China   | Lateral epicondylitis | 11 | 708        | Visual analogue scale                            | Positive             | Cochrane risk of bias tool                 | not inform |
|                          |         |                       |    |            | Upper limb function score                        | Positive             |                                            |            |
|                          |         |                       |    |            | Roles and maudsley scale                         | Positive             |                                            |            |
|                          |         |                       |    |            | Incidence of adverse reaction                    | Positive             |                                            |            |
| Lezheng Wang 2020        | China   | Lateral epicondylitis | 9  | 481        | Visual analogue scale                            | Positive             | Cochrane risk of bias tool and Jadad score | not inform |

|                               |                       |                       |    |      |                                                                 |                      |                                            |            |
|-------------------------------|-----------------------|-----------------------|----|------|-----------------------------------------------------------------|----------------------|--------------------------------------------|------------|
|                               |                       |                       |    |      | Grip strength                                                   | Unclear              |                                            |            |
| Samuel P Sussmilch-Leitch 201 | Australia             | Achilles tendinopathy | 5  | 290  | Visual analogue scale                                           | Potentially positive | Physiotherapy evidence database scale      | not inform |
|                               |                       |                       |    |      | Victorian institute of sports assessment–achilles questionnaire | Potentially positive |                                            |            |
| Yifei Fan 2020                | China                 | Achilles tendinopathy | 8  | 442  | Numerical rating scale                                          | Positive             | Cochrane risk of bias tool                 | not inform |
|                               |                       |                       |    |      | Visual analogue scale                                           | Positive             |                                            |            |
|                               |                       |                       |    |      | Roles and maudslley scale                                       | Positive             |                                            |            |
|                               |                       |                       |    |      | Likert scale                                                    | Positive             |                                            |            |
|                               |                       |                       |    |      | Victorian institute of sports assessment–achilles questionnaire | Positive             |                                            |            |
|                               |                       |                       |    |      | American orthopaedic foot and ankle society scale               | Positive             |                                            |            |
|                               |                       |                       |    |      | Tenderness score                                                | Unclear              |                                            |            |
|                               |                       |                       |    |      | Pain pressure threshold                                         | Unclear              |                                            |            |
| Magdalena Stania 2023         | Poland                | Achilles tendinopathy | 6  | 344  | Numerical rating scale                                          | Unclear              | Physiotherapy evidence database scale      | inform     |
|                               |                       |                       |    |      | Victorian institute of sports assessment–achilles questionnaire | Unclear              |                                            |            |
| Li Zhiyun 2013                | China                 | Plantar fasciitis     | 5  | 716  | Visual analogue scale                                           | Positive             | Jadad score                                | not inform |
| Jan Natbleen C. Dizon 2013    | Philippines           | Plantar fasciitis     | 11 | 1384 | Visual analogue scale                                           | Positive             | Physiotherapy evidence database scale      | not inform |
|                               |                       |                       |    |      | Roles and maudslley scale                                       | Positive             |                                            |            |
| Meng-Chen Yin 2014            | China                 | Plantar fasciitis     | 7  | 550  | Visual analogue scale                                           | Unclear              | Cochrane risk of bias tool                 | not inform |
|                               |                       |                       |    |      | Roles and maudslley scale                                       | Positive             |                                            |            |
| Jiale Sun 2017                | China                 | Plantar fasciitis     | 9  | 935  | Visual analogue scale                                           | Potentially positive | Cochrane risk of bias tool                 | not inform |
| Shuxiang Li 2018              | China                 | Plantar fasciitis     | 9  | 658  | Visual analogue scale                                           | Positive             | Cochrane risk of bias tool                 | inform     |
|                               |                       |                       |    |      | Incidence of recurrence                                         | Unclear              |                                            |            |
| Chien-Min Chen 2018           | China                 | Plantar fasciitis     | 5  | 369  | Visual analogue scale                                           | Potentially negative | Jadad score                                | not inform |
| Ying-Chun Wang 2019           | China                 | Plantar fasciitis     | 14 | 1392 | Visual analogue scale                                           | Unclear              | Cochrane risk of bias tool                 | not inform |
| Yuan Xiong 2019               | China                 | Plantar fasciitis     | 6  | 454  | Thickness score                                                 | Unclear              | Cochrane risk of bias tool and Jadad score | not inform |
|                               |                       |                       |    |      | Visual analogue scale                                           | Positive             |                                            |            |
| Hui Li 2019                   | China                 | Plantar fasciitis     | 5  | 177  | American orthopaedic foot and ankle society scale               | Unclear              | Cochrane risk of bias tool and Jadad score | not inform |
|                               |                       |                       |    |      | Visual analogue scale                                           | Positive             |                                            |            |
|                               |                       |                       |    |      | Foot function index                                             | Unclear              |                                            |            |
|                               |                       |                       |    |      | Pain and disability scale                                       | Unclear              |                                            |            |
| Zeyana Al-Siyabi 2022         | The Sultanate of Oman | Plantar fasciitis     | 7  | 369  | American orthopaedic foot and ankle society scale               | Unclear              | Cochrane risk of bias tool                 | not inform |
|                               |                       |                       |    |      | Visual analogue scale                                           | Potentially positive |                                            |            |
|                               |                       |                       |    |      | Functional impairment                                           | Unclear              |                                            |            |
|                               |                       |                       |    |      | Activity limitation                                             | Positive             |                                            |            |
|                               |                       |                       |    |      | Patient satisfaction                                            | Positive             |                                            |            |
|                               |                       |                       |    |      | Thickness score                                                 | Unclear              |                                            |            |
| Janice de S. Guimarães 2023   | Brazil                | Plantar fasciitis     | 30 | 3096 | Visual analogue scale                                           | Positive             | Cochrane risk of bias tool                 | not inform |
| Gao Ning 2022                 | China                 | Plantar fasciitis     | 16 | 1198 | Visual analogue scale                                           | Potentially positive | Cochrane risk of bias tool                 | not inform |
|                               |                       |                       |    |      | Thickness score                                                 | Potentially positive |                                            |            |

|                           |             |                                                     |    |      |                                                              |                      |                                                                                                        |            |
|---------------------------|-------------|-----------------------------------------------------|----|------|--------------------------------------------------------------|----------------------|--------------------------------------------------------------------------------------------------------|------------|
|                           |             |                                                     |    |      | Maximum continuous walking time                              | Potentially positive |                                                                                                        |            |
| Chen Ke-cun 2022          | China       | Plantar fasciitis                                   | 22 | 2240 | Foot function index                                          | Unclear              | Cochrane risk of bias tool and Jadad score                                                             | not inform |
|                           |             |                                                     |    |      | Visual analogue scale                                        | Positive             |                                                                                                        |            |
|                           |             |                                                     |    |      | Roles and maudslley scale                                    | Positive             |                                                                                                        |            |
| Zhou Yinan 2020           | China       | Plantar fasciitis                                   | 8  | 1489 | Visual analogue scale                                        | Positive             | Cochrane risk of bias tool                                                                             | not inform |
|                           |             |                                                     |    |      | Roles and maudslley scale                                    | Positive             |                                                                                                        |            |
| João Vitor Ferlito 2023   | Brazil      | Plantar fasciitis                                   | 19 | 1089 | Visual analogue scale                                        | Potentially negative | Physiotherapy evidence database scale                                                                  | inform     |
|                           |             |                                                     |    |      | Foot function index                                          | Potentially positive |                                                                                                        |            |
|                           |             |                                                     |    |      | American orthopaedic foot and ankle society scale            | Potentially positive |                                                                                                        |            |
| Jing Lou 2017             | China       | Plantar fasciitis                                   | 9  | 1174 | Visual analogue scale                                        | Potentially positive | Cochrane risk of bias tool                                                                             | not inform |
|                           |             |                                                     |    |      | Roles and maudslley scale                                    | Potentially positive |                                                                                                        |            |
| Ruedi Steuri 2017         | Switzerland | Shoulder impingement                                | 3  | 117  | Visual analogue scale                                        | Potentially positive | Cochrane risk of bias tool                                                                             | inform     |
| Stefano Salvioi 2017      | Italy       | Plantar heel pain                                   | 10 | 1114 | Visual analogue scale                                        | Unclear              | Cochrane risk of bias tool                                                                             | inform     |
|                           |             |                                                     |    |      | Numerical rating scale                                       | Unclear              |                                                                                                        |            |
| BaoLin Li 2018            | China       | Plantar heel pain                                   | 3  | 312  | Visual analogue scale                                        | Positive             | Cochrane risk of bias tool                                                                             | not inform |
| Yangquan Hao 2018         | China       | Osteonecrosis of the femoral head                   | 4  | 230  | Visual analogue scale                                        | Unclear              | Cochrane risk of bias tool                                                                             | not inform |
|                           |             |                                                     |    |      | Harris hip score                                             | Potentially positive |                                                                                                        |            |
| Jin Mei 2022              | China       | Osteonecrosis of the femoral head                   | 9  | 409  | Harris hip score                                             | Potentially positive | National institute for clinical excellence case series scoring, Newcastle-Ottawa scale and Jadad score | not inform |
|                           |             |                                                     |    |      | Visual analogue scale                                        | Potentially positive |                                                                                                        |            |
|                           |             |                                                     |    |      | Magnetic resonance imaging                                   | Potentially positive |                                                                                                        |            |
| JiaBin Li 2022            | China       | Osteonecrosis of the femoral head                   | 14 | 860  | Harris hip score                                             | Positive             | Cochrane risk of bias tool                                                                             | not inform |
|                           |             |                                                     |    |      | Visual analogue scale                                        | Positive             |                                                                                                        |            |
|                           |             |                                                     |    |      | Activity of daily living scale                               | Positive             |                                                                                                        |            |
| HE Xiangbo 2021           | China       | Osteonecrosis of the femoral head                   | 6  | 334  | Harris hip score                                             | Positive             | Cochrane risk of bias tool                                                                             | not inform |
| Jie Li 2023               | China       | Osteonecrosis of the femoral head                   | 11 | 780  | Harris hip score                                             | Positive             | Cochrane risk of bias tool                                                                             | not inform |
| Chun-De Liao 2018         | China       | Lower limb tendinopathy                             | 29 | 1865 | Visual analogue scale                                        | Positive             | Physiotherapy evidence database scale                                                                  | not inform |
|                           |             |                                                     |    |      | Function recovery                                            | positive             |                                                                                                        |            |
| Mohamed H. Elgendy 2023   | Egypt       | Upper and lower limb tendinopathies                 | 22 | 1789 | Visual analogue scale                                        | No effect            | Cochrane risk of bias tool                                                                             | not inform |
|                           |             |                                                     |    |      | Disability of the arm, shoulder and hand score               | No effect            |                                                                                                        |            |
| Spencer Jonathan Lee 2017 | the USA     | Patellar tendinopathy                               | 5  | 120  | Visual analogue scale                                        | Positive             | Physiotherapy evidence database scale                                                                  | not inform |
|                           |             |                                                     |    |      | Victorian institute of sport australia-patella questionnaire | Positive             |                                                                                                        |            |
| Luca Andriolo 2018        | Italy       | Patellar tendinopathy                               | 6  | 261  | Victorian institute of sport australia-patella questionnaire | Positive             | Coleman methodology score                                                                              | not inform |
| Magdalena Stania 2022     | Poland      | Patellar tendinopathy                               | 7  | 311  | Visual analogue scale                                        | Unclear              | Physiotherapy evidence database scale                                                                  | not inform |
|                           |             |                                                     |    |      | Victorian institute of sport australia-patella questionnaire | Unclear              |                                                                                                        |            |
| Chun-De Liao 2018         | China       | Knee tendinopathies and other soft tissue disorders | 19 | 1189 | Visual analogue scale                                        | Positive             | Cochrane risk of bias tool and Physiotherapy evidence database scale                                   | not inform |
|                           |             |                                                     |    |      | Roles and maudslley scale                                    | Positive             |                                                                                                        |            |
|                           |             |                                                     |    |      | Likert scale                                                 | Positive             |                                                                                                        |            |
|                           |             |                                                     |    |      | Incidence of adverse reaction                                | Positive             |                                                                                                        |            |

|                            |          |                                      |    |      |                                                                |                      |                                                                                |            |
|----------------------------|----------|--------------------------------------|----|------|----------------------------------------------------------------|----------------------|--------------------------------------------------------------------------------|------------|
|                            |          |                                      |    |      | Range of motion                                                | Positive             |                                                                                |            |
|                            |          |                                      |    |      | Victorian institute of sport australia-patella questionnaire   | Positive             |                                                                                |            |
| Li Zhang 2017              | China    | Acute and chronic soft tissue wounds | 10 | 473  | Wound healing rate                                             | Positive             | Cochrane risk of bias tool                                                     | not inform |
|                            |          |                                      |    |      | Wound healing time                                             | Positive             |                                                                                |            |
|                            |          |                                      |    |      | Percentage of the wound-healing area                           | Positive             |                                                                                |            |
|                            |          |                                      |    |      | Incidence of adverse reaction                                  | Positive             |                                                                                |            |
|                            |          |                                      |    |      | Wound infection rate                                           | Positive             |                                                                                |            |
| Li Tengqi 2019             | China    | Knee osteoarthritis                  | 7  | 366  | Visual analogue scale                                          | Potentially positive | Cochrane risk of bias tool                                                     | not inform |
|                            |          |                                      |    |      | Range of motion                                                | Potentially positive |                                                                                |            |
|                            |          |                                      |    |      | Lequesne index                                                 | Potentially positive |                                                                                |            |
|                            |          |                                      |    |      | Western ontario and mcmaster universities osteoarthritis index | Potentially positive |                                                                                |            |
| Ricardo Maia Ferreira 2019 | Portugal | Knee osteoarthritis                  | 1  | 105  | Visual analogue scale                                          | Unclear              | Physiotherapy evidence database scale                                          | inform     |
|                            |          |                                      |    |      | Western ontario and mcmaster universities osteoarthritis index | Unclear              |                                                                                |            |
| Chi-Kun Hsieh 2020         | China    | Knee osteoarthritis                  | 9  | 705  | Visual analogue scale                                          | Potentially positive | Strengthening the reporting of observational studies in epidemiology statement | not inform |
|                            |          |                                      |    |      | Western ontario and mcmaster universities osteoarthritis index | Potentially positive |                                                                                |            |
| Ying-Chun Wang 2019        | China    | Knee osteoarthritis                  | 9  | 431  | Visual analogue scale                                          | Positive             | Cochrane risk of bias tool                                                     | not inform |
|                            |          |                                      |    |      | Western ontario and mcmaster universities osteoarthritis index | Positive             |                                                                                |            |
| Huanzhi Ma 2020            | China    | Knee osteoarthritis                  | 6  | 589  | Visual analogue scale                                          | Positive             | Cochrane risk of bias tool                                                     | inform     |
|                            |          |                                      |    |      | Western ontario and mcmaster universities osteoarthritis index | Positive             |                                                                                |            |
|                            |          |                                      |    |      | Lequesne index                                                 | Positive             |                                                                                |            |
|                            |          |                                      |    |      | Incidence of adverse reaction                                  | Positive             |                                                                                |            |
| Juan Avendaño-Coy 2020     | Spain    | Knee osteoarthritis                  | 14 | 782  | Visual analogue scale                                          | Positive             | Cochrane risk of bias tool                                                     | inform     |
|                            |          |                                      |    |      | Western ontario and mcmaster universities osteoarthritis index | Positive             |                                                                                |            |
|                            |          |                                      |    |      | Range of motion                                                | Positive             |                                                                                |            |
|                            |          |                                      |    |      | Walking test                                                   | Positive             |                                                                                |            |
| Lu Chen 2020               | China    | Knee osteoarthritis                  | 32 | 2408 | Visual analogue scale                                          | Positive             | Cochrane risk of bias tool                                                     | not inform |
|                            |          |                                      |    |      | Western ontario and mcmaster universities osteoarthritis index | Positive             |                                                                                |            |
| Zhimin Huangfu 2020        | China    | Knee osteoarthritis                  | 21 | 1736 | Visual analogue scale                                          | Positive             | Cochrane risk of bias tool                                                     | inform     |
|                            |          |                                      |    |      | Western ontario and mcmaster universities osteoarthritis index | Positive             |                                                                                |            |
|                            |          |                                      |    |      | Range of motion                                                | Positive             |                                                                                |            |
| Dengcheng Huang 2020       | China    | Knee osteoarthritis                  | 12 | 1040 | Visual analogue scale                                          | Positive             | Cochrane risk of bias tool and Jadad score                                     | not inform |
|                            |          |                                      |    |      | Western ontario and mcmaster universities osteoarthritis index | Positive             |                                                                                |            |
|                            |          |                                      |    |      | Lequesne index                                                 | Unclear              |                                                                                |            |
| Shaoyong Yu 2020           | China    | Knee osteoarthritis                  | 11 | 969  | Visual analogue scale                                          | Positive             | Cochrane risk of bias tool                                                     | not inform |
|                            |          |                                      |    |      | Western ontario and mcmaster universities osteoarthritis index | Positive             |                                                                                |            |
| Qiang Hu 2021              | China    | Knee osteoarthritis                  | 16 | 1259 | Visual analogue scale                                          | Positive             | Cochrane risk of bias tool                                                     | not inform |
|                            |          |                                      |    |      | Western ontario and mcmaster universities osteoarthritis index | Positive             |                                                                                |            |
|                            |          |                                      |    |      | Lysholm score                                                  | Positive             |                                                                                |            |

|                        |           |                                                    |    |      |                                                                |                      |                                       |            |
|------------------------|-----------|----------------------------------------------------|----|------|----------------------------------------------------------------|----------------------|---------------------------------------|------------|
|                        |           |                                                    |    |      | Lequesne index                                                 | Positive             |                                       |            |
| Jinyu Gu 2022          | China     | Knee osteoarthritis                                | 13 | 1132 | Visual analogue scale                                          | Positive             | Cochrane risk of bias tool            | not inform |
|                        |           |                                                    |    |      | Western ontario and mcmaster universities osteoarthritis index | Positive             |                                       |            |
|                        |           |                                                    |    |      | Lysholm score                                                  | Positive             |                                       |            |
|                        |           |                                                    |    |      | Incidence of adverse reaction                                  | Unclear              |                                       |            |
| Zhipeng Ma 2023        | China     | Knee osteoarthritis                                | 12 | 1043 | Visual analogue scale                                          | Positive             | Cochrane risk of bias tool            | not inform |
|                        |           |                                                    |    |      | Western ontario and mcmaster universities osteoarthritis index | Positive             |                                       |            |
| AC Silva 2023          | Brazil    | Knee osteoarthritis                                | 12 | 734  | Visual analogue scale                                          | Potentially positive | Physiotherapy evidence database scale | inform     |
|                        |           |                                                    |    |      | Western ontario and mcmaster universities osteoarthritis index | Potentially positive |                                       |            |
|                        |           |                                                    |    |      | Knee injury and osteoarthritis outcome score                   | Potentially positive |                                       |            |
|                        |           |                                                    |    |      | Lequesne index                                                 | Potentially positive |                                       |            |
| Sofia Oliveira 2022    | Portugal  | Knee osteoarthritis                                | 20 | 1414 | Visual analogue scale                                          | Positive             | Cochrane risk of bias tool            | inform     |
|                        |           |                                                    |    |      | Western ontario and mcmaster universities osteoarthritis index | Positive             |                                       |            |
|                        |           |                                                    |    |      | Lequesne index                                                 | Positive             |                                       |            |
| Jayson Lian 2018       | the USA   | Enthesopathy of the extensor carpi radialis brevis | 3  | 263  | Visual analogue scale                                          | Unclear              | Jadad score                           | not inform |
|                        |           |                                                    |    |      | Grip Strength                                                  | Unclear              |                                       |            |
|                        |           |                                                    |    |      | Incidence of adverse reaction                                  | Unclear              |                                       |            |
| Hani Al-Abbad 2020     | Australia | Musculoskeletal condition                          | 27 | 3110 | Average particle size of the calcium deposition                | Unclear              | Cochrane risk of bias tool            | not inform |
|                        |           |                                                    |    |      | Total calcification resorption                                 | Unclear              |                                       |            |
|                        |           |                                                    |    |      | Plantar fascial thickness                                      | Unclear              |                                       |            |
|                        |           |                                                    |    |      | Femoral head necrosis lesion size                              | Unclear              |                                       |            |
| Ruihan Zhang 2021      | China     | Frozen shoulder                                    | 34 | 2293 | Constant-murley score                                          | Positive             | Cochrane risk of bias tool            | not inform |
|                        |           |                                                    |    |      | Visual analogue scale                                          | Positive             |                                       |            |
|                        |           |                                                    |    |      | External rotation range of motion                              | Unclear              |                                       |            |
|                        |           |                                                    |    |      | Incidence of adverse reaction                                  | Positive             |                                       |            |
| Zhu Chang-e 2017       | China     | Frozen shoulder                                    | 11 | 816  | Visual analogue scale                                          | Positive             | Cochrane risk of bias tool            | not inform |
|                        |           |                                                    |    |      | Range of motion                                                | Positive             |                                       |            |
| Hou Chengzhi 2019      | China     | Frozen shoulder                                    | 17 | 1449 | Visual analogue scale                                          | Positive             | Cochrane risk of bias tool            | not inform |
|                        |           |                                                    |    |      | Shoulder pain and disability index                             | Positive             |                                       |            |
|                        |           |                                                    |    |      | Range of motion                                                | Positive             |                                       |            |
| HAN Nahui 2020         | China     | Frozen shoulder                                    | 20 | 1404 | Visual analogue scale                                          | Positive             | Jadad score                           | not inform |
|                        |           |                                                    |    |      | Constant-murley score                                          | Positive             |                                       |            |
|                        |           |                                                    |    |      | Range of motion                                                | Positive             |                                       |            |
| GUAN Fuxi 2018         | China     | Adhesive capsulitis                                | 15 | 1063 | Constant-murley score                                          | Positive             | Cochrane risk of bias tool            | not inform |
|                        |           |                                                    |    |      | Visual analogue scale                                          | Positive             |                                       |            |
| Patrick Vavken 2009    | the USA   | Calcific tendinitis of the shoulder                | 14 | 995  | Visual analogue scale                                          | Positive             | Jadad score                           | not inform |
|                        |           |                                                    |    |      | Constant-murley score                                          | Positive             |                                       |            |
| Francesco Ioppolo 2013 | Italy     | Calcific tendinitis of the shoulder                | 6  | 460  | Total calcification resorption                                 | Positive             | Physiotherapy evidence database scale | not inform |

|                         |            |                                     |    |      |                                                               |                      |                                            |            |
|-------------------------|------------|-------------------------------------|----|------|---------------------------------------------------------------|----------------------|--------------------------------------------|------------|
|                         |            |                                     |    |      | Total calcification resorption                                | Positive             |                                            |            |
|                         |            |                                     |    |      | Partial calcification resorption                              | Positive             |                                            |            |
|                         |            |                                     |    |      | Visual analogue scale                                         | Positive             |                                            |            |
|                         |            |                                     |    |      | Constant-murley score                                         | Positive             |                                            |            |
| Jan K.G. Louwerens 2014 | Netherland | Calcific tendinitis of the shoulder | 20 | 1544 | Visual analogue scale                                         | Positive             | Cochrane risk of bias tool                 | inform     |
|                         |            |                                     |    |      | Constant-murley score                                         | Positive             |                                            |            |
|                         |            |                                     |    |      | Total calcification resorption                                | Positive             |                                            |            |
| Qianyuan WANG 2017      | China      | Calcific tendinitis of the shoulder | 5  | 302  | Visual analogue scale                                         | Positive             | Jadad score                                | not inform |
|                         |            |                                     |    |      | Constant-murley score                                         | Positive             |                                            |            |
|                         |            |                                     |    |      | Total calcification resorption                                | Positive             |                                            |            |
|                         |            |                                     |    |      | Average particle size of the calcium deposition               | Positive             |                                            |            |
| HAN Xuan 2021           | China      | Rotator cuff tendinopathy           | 11 | 529  | Visual analogue scale                                         | Unclear              | Physiotherapy evidence database scale      | not inform |
|                         |            |                                     |    |      | Constant-murley score                                         | Positive             |                                            |            |
|                         |            |                                     |    |      | Incidence of adverse reaction                                 | Potentially positive |                                            |            |
| Chen Mingfeng 2022      | China      | Rotator cuff tear                   | 14 | 881  | Visual analogue scale                                         | Positive             | Cochrane risk of bias tool                 | not inform |
|                         |            |                                     |    |      | Constant-murley score                                         | Positive             |                                            |            |
|                         |            |                                     |    |      | Incidence of adverse reaction                                 | Positive             |                                            |            |
|                         |            |                                     |    |      | Range of motion                                               | Positive             |                                            |            |
|                         |            |                                     |    |      | University of california at los angeles shoulder rating scale | Positive             |                                            |            |
| Hunter S. Angileri 2023 | the USA    | Rotator cuff tendinopathy           | 12 | 1128 | Visual analogue scale                                         | Potentially positive | Cochrane risk of bias tool                 | not inform |
|                         |            |                                     |    |      | Constant-murley score                                         | Potentially positive |                                            |            |
|                         |            |                                     |    |      | Total calcification resorption                                | Potentially positive |                                            |            |
| Lei Yue 2021            | China      | Low back pain                       | 10 | 455  | Visual analogue scale                                         | Positive             | Cochrane risk of bias tool and Jadad score | inform     |
|                         |            |                                     |    |      | Oswestry disability index                                     | Positive             |                                            |            |
|                         |            |                                     |    |      | Numeric rating scale                                          | Positive             |                                            |            |
|                         |            |                                     |    |      | Pain self-efficacy questionnaire                              | Positive             |                                            |            |
|                         |            |                                     |    |      | Incidence of adverse reaction                                 | Positive             |                                            |            |
| Chunhong Li 2022        | China      | Low back pain                       | 13 | 648  | Visual analogue scale                                         | Positive             | Cochrane risk of bias tool                 | inform     |
|                         |            |                                     |    |      | Oswestry disability index                                     | Positive             |                                            |            |
|                         |            |                                     |    |      | Incidence of adverse reaction                                 | Positive             |                                            |            |
| Jinhui Ma 2020          | China      | Low back pain                       | 5  | 222  | Visual analogue scale                                         | Positive             | Cochrane risk of bias tool                 | inform     |
|                         |            |                                     |    |      | Numeric rating scale                                          | Positive             |                                            |            |
|                         |            |                                     |    |      | Oswestry disability index                                     | Positive             |                                            |            |
|                         |            |                                     |    |      | Incidence of adverse reaction                                 | Positive             |                                            |            |
| Kun Liu 2023            | China      | Low back pain                       | 12 | 632  | Visual analogue scale                                         | Positive             | Cochrane risk of bias tool                 | inform     |
|                         |            |                                     |    |      | Oswestry disability index                                     | Positive             |                                            |            |
|                         |            |                                     |    |      | Mental health score                                           | Unclear              |                                            |            |
| Su Muyang 2022          | China      | Myofascial pain syndrome            | 10 | 611  | Incidence of adverse reaction                                 | Positive             | Cochrane risk of bias tool                 | not inform |

|                            |        |                                     |    |      |                                                                         |                      |                                                                      |            |
|----------------------------|--------|-------------------------------------|----|------|-------------------------------------------------------------------------|----------------------|----------------------------------------------------------------------|------------|
|                            |        |                                     |    |      | Visual analogue scale                                                   | Positive             |                                                                      |            |
|                            |        |                                     |    |      | Oswestry disability index                                               | Positive             |                                                                      |            |
|                            |        |                                     |    |      | Pain pressure threshold                                                 | Positive             |                                                                      |            |
| Ji Hyun Jun 2021           | Korea  | Myofascial pain syndrome            | 11 | 505  | Visual analogue scale                                                   | Positive             | Cochrane risk of bias tool                                           | not inform |
|                            |        |                                     |    |      | Pain pressure threshold                                                 | Positive             |                                                                      |            |
|                            |        |                                     |    |      | Neck disability index                                                   | Unclear              |                                                                      |            |
| Tao Wu 2022                | China  | Myofascial pain syndrome            | 8  | 571  | Visual analogue scale                                                   | Positive             | Physiotherapy evidence database scale                                | not inform |
|                            |        |                                     |    |      | Pain pressure threshold                                                 | Positive             |                                                                      |            |
|                            |        |                                     |    |      | Neck disability index                                                   | Unclear              |                                                                      |            |
| Qing Zhang 2020            | China  | Myofascial pain syndrome            | 10 | 477  | Visual analogue scale                                                   | Positive             | Cochrane risk of bias tool and physiotherapy evidence database scale | not inform |
|                            |        |                                     |    |      | Pain pressure threshold                                                 | No effect            |                                                                      |            |
|                            |        |                                     |    |      | Neck disability index                                                   | No effect            |                                                                      |            |
| Jun-Il Yoo 2020            | Korea  | Myofascial pain syndrome            | 5  | 371  | Visual analogue scale                                                   | Potentially positive | Cochrane risk of bias tool                                           | not inform |
| Jin Ran 2017               | China  | Myofascial pain syndrome            | 8  | 370  | Visual analogue scale                                                   | Positive             | Cochrane risk of bias tool                                           | not inform |
| Carlos Avendaño-López 2023 | France | Myofascial pain syndrome            | 27 | 1377 | Visual analogue scale                                                   | Positive             | Cochrane risk of bias tool                                           | inform     |
|                            |        |                                     |    |      | Function recovery                                                       | Positive             |                                                                      |            |
|                            |        |                                     |    |      | Pain pressure threshold                                                 | Positive             |                                                                      |            |
|                            |        |                                     |    |      | Range of motion                                                         | Unclear              |                                                                      |            |
|                            |        |                                     |    |      | 36-item short-form                                                      | Unclear              |                                                                      |            |
| Ge Rui 2013                | China  | Tendon enthesiopathy                | 6  | 599  | Visual analogue scale                                                   | Positive             | Jadad score                                                          | not inform |
|                            |        |                                     |    |      | Incidence of adverse reaction                                           | Positive             |                                                                      |            |
| Chengzhi Hou 2019          | China  | Stenosing tenosynovitis             | 7  | 387  | Visual analogue scale                                                   | Positive             | Cochrane risk of bias tool                                           | not inform |
|                            |        |                                     |    |      | Cooney score                                                            | Positive             |                                                                      |            |
| Zimu Hu 2023               | China  | Post-stroked shoulder-hand syndrome | 7  | 494  | Visual analogue scale                                                   | Positive             | Cochrane risk of bias tool                                           | not inform |
|                            |        |                                     |    |      | Stroke-specific quality of life scale                                   | Positive             |                                                                      |            |
|                            |        |                                     |    |      | Fugl-meyer assessment                                                   | Positive             |                                                                      |            |
| Tingyu Zhang 2023          | China  | Post-stroked shoulder-hand syndrome | 18 | 1248 | Visual analogue scale                                                   | Positive             | Cochrane risk of bias tool                                           | not inform |
|                            |        |                                     |    |      | Fugl-meyer assessment                                                   | Positive             |                                                                      |            |
|                            |        |                                     |    |      | Range of motion                                                         | Positive             |                                                                      |            |
|                            |        |                                     |    |      | Functional comprehensive assessment score                               | Positive             |                                                                      |            |
| L Gao 2016                 | China  | Peyronie's disease                  | 6  | 443  | Plaque size                                                             | Potentially positive | Not inform                                                           | not inform |
|                            |        |                                     |    |      | Penile curvature                                                        | No effect            |                                                                      |            |
|                            |        |                                     |    |      | Pain reduction                                                          | Potentially positive |                                                                      |            |
|                            |        |                                     |    |      | Intercourse function                                                    | No effect            |                                                                      |            |
| Ahmed M.Bakr 2021          | Egypt  | Peyronie's disease                  | 3  | 238  | Penile curvature                                                        | No effect            | Cochrane risk of bias tool                                           | not inform |
|                            |        |                                     |    |      | Visual analogue scale                                                   | No effect            |                                                                      |            |
|                            |        |                                     |    |      | International index of erectile function-erectile function domain score | Unclear              |                                                                      |            |
| Hesong Jiang 2017          | China  | Peyronie's disease                  | 8  | 930  | Plaque size                                                             | Potentially positive | Jadad score                                                          | not inform |



|                         |         |                                                  |    |      |                                                                                      |                      |                                                                                |            |
|-------------------------|---------|--------------------------------------------------|----|------|--------------------------------------------------------------------------------------|----------------------|--------------------------------------------------------------------------------|------------|
|                         |         |                                                  |    |      | Penile pain reduction                                                                | Positive             |                                                                                |            |
|                         |         |                                                  |    |      | Plaque size                                                                          | Positive             |                                                                                |            |
|                         |         |                                                  |    |      | Penile curvature                                                                     | Positive             |                                                                                |            |
|                         |         |                                                  |    |      | Intercourse function                                                                 | Positive             |                                                                                |            |
| Zhihua vLu 2016         | the USA | Erectile dysfunction                             | 14 | 833  | International index of erectile function-erectile function domain score              | Positive             | Cochrane risk of bias tool                                                     | not inform |
|                         |         |                                                  |    |      | Erection hardness score                                                              | Positive             |                                                                                |            |
| Zi-jun Zou 2017         | China   | Erectile dysfunction                             | 15 | 695  | International index of erectile function-erectile function domain score              | Potentially positive | Cochrane risk of bias tool and Methodological index for non-randomized studies | not inform |
|                         |         |                                                  |    |      | Erection hardness score                                                              | Potentially positive |                                                                                |            |
| J.C.Angulo 2016         | Spain   | Erectile dysfunction                             | 12 | 636  | International index of erectile function-erectile function domain score              | Positive             | Not inform                                                                     | not inform |
| MAN Libo 2017           | China   | Erectile dysfunction                             | 9  | 637  | International index of erectile function-erectile function domain score              | Positive             | Cochrane risk of bias tool                                                     | not inform |
|                         |         |                                                  |    |      | Erection hardness score                                                              | Positive             |                                                                                |            |
| Liang Dong 2019         | China   | Erectile dysfunction                             | 7  | 522  | International index of erectile function-erectile function domain score              | Positive             | Cochrane risk of bias tool                                                     | not inform |
|                         |         |                                                  |    |      | Erection hardness score                                                              | Positive             |                                                                                |            |
| Ioannis Sokolakis 2019  | Germany | Erectile dysfunction                             | 10 | 873  | International index of erectile function-erectile function domain score              | Positive             | Cochrane risk of bias tool                                                     | not inform |
|                         |         |                                                  |    |      | Peak systolic velocity                                                               | Positive             |                                                                                |            |
|                         |         |                                                  |    |      | Erection hardness score                                                              | Positive             |                                                                                |            |
| MO Dun-sheng 2019       | China   | Erectile dysfunction                             | 8  | 595  | International index of erectile function-erectile function domain score              | Positive             | Jadad score                                                                    | not inform |
|                         |         |                                                  |    |      | Erection hardness score                                                              | Positive             |                                                                                |            |
| Jeffrey D.Campbell 2019 | Canada  | Erectile dysfunction                             | 7  | 607  | International index of erectile function-erectile function domain score              | Positive             | Cochrane risk of bias tool                                                     | not inform |
|                         |         |                                                  |    |      | Erection hardness score                                                              | Positive             |                                                                                |            |
|                         |         |                                                  |    |      | Incidence of adverse reaction                                                        | Positive             |                                                                                |            |
| Huibao Yao 2022         | China   | Erectile dysfunction                             | 16 | 1064 | International index of erectile function-erectile function domain score              | Positive             | Cochrane risk of bias tool                                                     | not inform |
|                         |         |                                                  |    |      | Erection hardness score                                                              | Unclear              |                                                                                |            |
| Junbo Liu 2020          | China   | Erectile dysfunction                             | 10 | 697  | International index of erectile function-erectile function domain score              | Positive             | Cochrane risk of bias tool                                                     | not inform |
|                         |         |                                                  |    |      | Erection hardness score                                                              | Positive             |                                                                                |            |
| Wu Tao 2019             | China   | Erectile dysfunction                             | 10 | 697  | International index of erectile function-erectile function domain score              | Positive             | Cochrane risk of bias tool                                                     | not inform |
|                         |         |                                                  |    |      | Erection hardness score                                                              | Positive             |                                                                                |            |
| Beom Yong Rho 2022      | Korea   | Erectile dysfunction                             | 5  | 460  | International index of erectile function-erectile function domain score              | Potentially positive | Cochrane risk of bias tool and Newcastle-Ottawa scale                          | inform     |
| Raul I. Clavijo 2017    | the USA | Erectile dysfunction                             | 7  | 602  | International index of erectile function-erectile function domain score              | Positive             | Cochrane risk of bias tool                                                     | not inform |
| Dariusz Kalka 2021      | Poland  | Erectile dysfunction                             | 5  | 354  | International index of erectile function-erectile function domain score              | Positive             | Cochrane risk of bias tool                                                     | not inform |
|                         |         |                                                  |    |      | Erection hardness score                                                              | Positive             |                                                                                |            |
|                         |         |                                                  |    |      | Flow-mediated dilatation                                                             | Positive             |                                                                                |            |
| LIAO Bo 2019            | China   | Chronic prostatitis/chronic pelvic pain syndrome | 12 | 838  | National institute of health-chronic prostatitis symptom index total score           | Positive             | Cochrane risk of bias tool                                                     | not inform |
|                         |         |                                                  |    |      | National institute of health-chronic prostatitis symptom index pain score            | Positive             |                                                                                |            |
|                         |         |                                                  |    |      | National institute of health-chronic prostatitis symptom index urinary symptom score | Positive             |                                                                                |            |
|                         |         |                                                  |    |      | National institute of health-chronic prostatitis symptom index quality of life score | Positive             |                                                                                |            |
| Penghui Yuan 2019       | China   | Chronic prostatitis/chronic pelvic pain syndrome | 5  | 280  | National institute of health-chronic prostatitis symptom index total score           | Positive             | Cochrane risk of bias tool                                                     | not inform |
|                         |         |                                                  |    |      | National institute of health-chronic prostatitis symptom index pain score            | Positive             |                                                                                |            |

|                         |           |                                                  |    |     |                                                                                      |                      |                                        |            |
|-------------------------|-----------|--------------------------------------------------|----|-----|--------------------------------------------------------------------------------------|----------------------|----------------------------------------|------------|
|                         |           |                                                  |    |     | National institute of health-chronic prostatitis symptom index urinary symptom score | Positive             |                                        |            |
|                         |           |                                                  |    |     | National institute of health-chronic prostatitis symptom index quality of life score | Positive             |                                        |            |
| Ioannis Mykoniatis 2021 | Germany   | Chronic prostatitis/chronic pelvic pain syndrome | 6  | 316 | Numerical rating scale                                                               | Positive             | Cochrane risk of bias tool             | inform     |
|                         |           |                                                  |    |     | National institute of health-chronic prostatitis symptom index total score           | Positive             |                                        |            |
|                         |           |                                                  |    |     | National institute of health-chronic prostatitis symptom index pain score            | Positive             |                                        |            |
|                         |           |                                                  |    |     | National institute of health-chronic prostatitis symptom index urinary symptom score | Unclear              |                                        |            |
|                         |           |                                                  |    |     | National institute of health-chronic prostatitis symptom index quality of life score | Positive             |                                        |            |
|                         |           |                                                  |    |     | International index of erectile function-erectile function domain score              | Unclear              |                                        |            |
|                         |           |                                                  |    |     | International prostate symptom score                                                 | Unclear              |                                        |            |
|                         |           |                                                  |    |     | Post-void residual urine volume                                                      | Unclear              |                                        |            |
|                         |           |                                                  |    |     | Maximum urinary flow rate                                                            | Unclear              |                                        |            |
| Guizhong Li 2021        | China     | Chronic prostatitis/chronic pelvic pain syndrome | 6  | 317 | National institute of health-chronic prostatitis symptom index total score           | Potentially positive | Cochrane risk of bias tool             | not inform |
|                         |           |                                                  |    |     | National institute of health-chronic prostatitis symptom index urinary symptom score | Potentially positive |                                        |            |
|                         |           |                                                  |    |     | National institute of health-chronic prostatitis symptom index quality of life score | Potentially positive |                                        |            |
|                         |           |                                                  |    |     | Visual analogue scale                                                                | Potentially positive |                                        |            |
| GE Jinchao 2015         | China     | Chronic prostatitis/chronic pelvic pain syndrome | 8  | 592 | National institute of health-chronic prostatitis symptom index total score           | Positive             | Cochrane risk of bias tool             | not inform |
| Guoxian Deng 2020       | China     | Chronic non-bacterial prostatitis                | 4  | 428 | National institute of health-chronic prostatitis symptom index total score           | Positive             | Cochrane risk of bias tool             | not inform |
| Ponco Birowo 2020       | Indonesia | Chronic non-bacterial prostatitis                | 3  | 137 | National institute of health-chronic prostatitis symptom index total score           | Positive             | Cochrane risk of bias tool             | not inform |
|                         |           |                                                  |    |     | National institute of health-chronic prostatitis symptom index pain score            | Positive             |                                        |            |
|                         |           |                                                  |    |     | National institute of health-chronic prostatitis symptom index urinary symptom score | Positive             |                                        |            |
|                         |           |                                                  |    |     | National institute of health-chronic prostatitis symptom index quality of life score | Positive             |                                        |            |
| Jin-Youn Lee 2014       | Korea     | Post-stroke spasticity                           | 5  | 117 | Modified ashworth scale                                                              | Positive             | Cochrane risk of bias tool             | not inform |
| Peipei Guo 2017         | China     | Post-stroke spasticity                           | 6  | 301 | Modified ashworth scale                                                              | Positive             | Jadad score and Newcastle-Ottawa scale | not inform |
|                         |           |                                                  |    |     | Incidence of adverse reaction                                                        | Positive             |                                        |            |
| Jie XIANG 2018          | China     | Post-stroke spasticity                           | 8  | 385 | Modified ashworth scale                                                              | Positive             | Cochrane risk of bias tool             | not inform |
|                         |           |                                                  |    |     | Modified tardieu scale                                                               | Positive             |                                        |            |
|                         |           |                                                  |    |     | Range of motion                                                                      | Positive             |                                        |            |
|                         |           |                                                  |    |     | Hmax/Mmax ratio                                                                      | Positive             |                                        |            |
| Davood Azimpour 2017    | Iran      | Post-stroke spasticity                           | 11 | 261 | Modified ashworth scale                                                              | Positive             | Physiotherapy evidence database scale  | not inform |
|                         |           |                                                  |    |     | Passive rang of movement                                                             | Positive             |                                        |            |
| Gongwei Jia 2020        | China     | Post-stroke spasticity                           | 8  | 301 | Modified ashworth scale                                                              | Positive             | Cochrane risk of bias tool             | not inform |
|                         |           |                                                  |    |     | Visual analogue scale                                                                | Positive             |                                        |            |
|                         |           |                                                  |    |     | Range of motion                                                                      | Positive             |                                        |            |
|                         |           |                                                  |    |     | Fugl-meyer assessment                                                                | Positive             |                                        |            |
|                         |           |                                                  |    |     | Incidence of adverse reaction                                                        | Positive             |                                        |            |
| Liang-Jun Ou-Yang 2023  | China     | Post-stroke spasticity                           | 13 | 667 | Modified ashworth scale                                                              | Positive             | Cochrane risk of bias tool             | not inform |
|                         |           |                                                  |    |     | Modified tardieu scale                                                               | Positive             |                                        |            |
| Mohammad Etloom 2018    | Jordan    | Multiple sclerosis spasticity                    | 1  | 64  | Fugl-meyer assessment                                                                | Positive             | Physiotherapy evidence database scale  | inform     |

|                           |         |                                   |    |      |                                 |                      |                                       |            |
|---------------------------|---------|-----------------------------------|----|------|---------------------------------|----------------------|---------------------------------------|------------|
|                           |         |                                   |    |      | Modified ashworth scale         | Unclear              |                                       |            |
|                           |         |                                   |    |      | Visual analogue scale           | Unclear              |                                       |            |
|                           |         |                                   |    |      | Hmax/Mmax ratio                 | Unclear              |                                       |            |
| Jae Ho Oh 2019            | Korea   | Spasticity                        | 9  | 385  | Modified ashworth scale         | Positive             | Cochrane risk of bias tool            | not inform |
| Emanuela Elena Mihai 2021 | Romania | Post-stroke lower limb spasticity | 7  | 170  | Modified ashworth scale         | Positive             | Physiotherapy evidence database scale | not inform |
|                           |         |                                   |    |      | Modified tardieu scale          | Positive             |                                       |            |
|                           |         |                                   |    |      | Visual analogue scale           | Positive             |                                       |            |
|                           |         |                                   |    |      | Hmax/Mmax ratio                 | Unclear              |                                       |            |
|                           |         |                                   |    |      | Passive rang of movement        | Positive             |                                       |            |
|                           |         |                                   |    |      | Timed up and go test            | Unclear              |                                       |            |
| Rosa Cabanas-Valdés 2019  | Spain   | Post-stroke lower limb spasticity | 12 | 278  | Modified ashworth scale         | Positive             | Physiotherapy evidence database scale | not inform |
|                           |         |                                   |    |      | Range of motion                 | Positive             |                                       |            |
|                           |         |                                   |    |      | Fugl-meyer assessment           | Positive             |                                       |            |
|                           |         |                                   |    |      | Incidence of adverse reaction   | Positive             |                                       |            |
| Jiabao Guo 2017           | China   | Post-stroke lower limb spasticity | 6  | 192  | Modified ashworth scale         | Positive             | Cochrane risk of bias tool            | not inform |
|                           |         |                                   |    |      | Fugl-meyer assessment           | Positive             |                                       |            |
| Rosa Cabanas-Valdés 2020  | Spain   | Post-stroke upper limb spasticity | 16 | 764  | Modified ashworth scale         | Positive             | Physiotherapy evidence database scale | not inform |
|                           |         |                                   |    |      | Fugl-meyer assessment           | Positive             |                                       |            |
|                           |         |                                   |    |      | Visual analogue scale           | Unclear              |                                       |            |
| Hui-Ling Zhang 2022       | China   | Post-stroke upper limb spasticity | 42 | 1973 | Modified ashworth scale         | Potentially positive | Cochrane risk of bias tool            | inform     |
|                           |         |                                   |    |      | Incidence of adverse reaction   | Potentially positive |                                       |            |
| LIU Guoqing 2021          | China   | Cerebral palsy spasticity         | 7  | 350  | Modified ashworth scale         | Positive             | Cochrane risk of bias tool            | not inform |
|                           |         |                                   |    |      | Range of motion                 | Positive             |                                       |            |
|                           |         |                                   |    |      | Gross motor function measure-88 | Positive             |                                       |            |
|                           |         |                                   |    |      | Plantar surface area            | Positive             |                                       |            |
|                           |         |                                   |    |      | Step length and pace            | Positive             |                                       |            |
| Min Cheol Chang 2023      | Korea   | Cerebral palsy spasticity         | 3  | 47   | Modified ashworth scale         | Positive             | Cochrane risk of bias tool            | not inform |
|                           |         |                                   |    |      | Range of motion                 | Positive             |                                       |            |
|                           |         |                                   |    |      | Plantar surface area            | Positive             |                                       |            |
| Yingying Guo 2022         | China   | Cerebral palsy spasticity         | 8  | 475  | Modified ashworth scale         | Positive             | Cochrane risk of bias tool            | not inform |
|                           |         |                                   |    |      | Gross motor function measure-88 | Positive             |                                       |            |
|                           |         |                                   |    |      | Range of motion                 | Positive             |                                       |            |
|                           |         |                                   |    |      | Plantar surface area            | Positive             |                                       |            |
|                           |         |                                   |    |      | Plantar surface pressure        | Positive             |                                       |            |
|                           |         |                                   |    |      | Incidence of adverse reaction   | Positive             |                                       |            |
| Hyun-Jung KIM 2019        | Korea   | Cerebral palsy spasticity         | 5  | 104  | Modified ashworth scale         | Potentially positive | Physiotherapy evidence database scale | not inform |
|                           |         |                                   |    |      | Range of motion                 | Potentially positive |                                       |            |
|                           |         |                                   |    |      | Plantar surface area            | Potentially positive |                                       |            |

|                            |           |                                                  |         |         |                                                                 |                      |                                                                                   |            |
|----------------------------|-----------|--------------------------------------------------|---------|---------|-----------------------------------------------------------------|----------------------|-----------------------------------------------------------------------------------|------------|
|                            |           |                                                  |         |         | Plantar surface pressure                                        | Potentially positive |                                                                                   |            |
| Haiyang Wu 2023            | China     | Cervical spondylotic radiculopathy               | 9       | 610     | Visual analogue scale                                           | Positive             | Cochrane risk of bias tool and Jadad score                                        | not inform |
|                            |           |                                                  |         |         | Neck disability index                                           | Positive             |                                                                                   |            |
|                            |           |                                                  |         |         | Pressure test score                                             | No effect            |                                                                                   |            |
|                            |           |                                                  |         |         | Median nerve F wave conduction velocity                         | Positive             |                                                                                   |            |
| Li Zhang 2017              | China     | Chronic wounds                                   | 7       | 301     | Wound healing rate                                              | Positive             | Jadad score                                                                       | not inform |
|                            |           |                                                  |         |         | Wound healing area                                              | Positive             |                                                                                   |            |
|                            |           |                                                  |         |         | Wound healing time                                              | Positive             |                                                                                   |            |
|                            |           |                                                  |         |         | Wound infection rate                                            | Positive             |                                                                                   |            |
|                            |           |                                                  |         |         | Incidence of adverse reaction                                   | Positive             |                                                                                   |            |
| Jonathan Häußer 2021       | Germany   | Bone marrow oedema                               | 6       | 168     | Visual analogue scale                                           | Potentially positive | Downs and Black checklist                                                         | not inform |
|                            |           |                                                  |         |         | Function recovery                                               | Potentially positive |                                                                                   |            |
| Yu Lin Tsai 2021           | China     | Breast cancer-related lymphedema                 | 8       | 274     | Volume of lymphedema                                            | Positive             | Cochrane risk of bias tool, Jadad score and Physiotherapy evidence database scale | inform     |
|                            |           |                                                  |         |         | Arm circumference                                               | Positive             |                                                                                   |            |
|                            |           |                                                  |         |         | Skin thickness                                                  | Positive             |                                                                                   |            |
|                            |           |                                                  |         |         | Range of motion                                                 | Positive             |                                                                                   |            |
|                            |           |                                                  |         |         | Disability of the arm, shoulder and hand score                  | Positive             |                                                                                   |            |
| Yanhui Yang 2022           | China     | Post-burn pathological scar                      | 9       | 422     | Numerical rating scale                                          | Positive             | Cochrane risk of bias tool                                                        | not inform |
|                            |           |                                                  |         |         | Scar thickness                                                  | Positive             |                                                                                   |            |
|                            |           |                                                  |         |         | Trans-epidermal water loss                                      | Positive             |                                                                                   |            |
|                            |           |                                                  |         |         | Vancouver scar scale                                            | Positive             |                                                                                   |            |
| Farshad Nikouei 2022       | Iran      | Coccydynia                                       | 4       | 81      | Visual analogue scale                                           | Positive             | Cochrane risk of bias tool                                                        | not inform |
| Diogo Simões Fonseca 2023  | Indonesia | Patellar tendinopathy                            | unknown | unknown | Visual analogue scale                                           | unknown              | Physiotherapy evidence database scale                                             | inform     |
|                            |           |                                                  |         |         | Victorian institute of sport australia–patella questionnaire    |                      |                                                                                   |            |
| Yang Han 2022              | China     | Lumbar disc herniation                           | unknown | unknown | Curative effect                                                 | unknown              | Cochrane risk of bias tool                                                        | not inform |
|                            |           |                                                  |         |         | Visual analogue scale                                           |                      |                                                                                   |            |
|                            |           |                                                  |         |         | Japanese orthopaedic association score                          |                      |                                                                                   |            |
|                            |           |                                                  |         |         | Oswestry disability index                                       |                      |                                                                                   |            |
| Yan Chenchen 2019          | China     | Lateral epicondylitis                            | unknown | unknown | Visual analogue scale                                           | unknown              | Cochrane risk of bias tool                                                        | not inform |
|                            |           |                                                  |         |         | Evaluation of the elbow function                                |                      |                                                                                   |            |
| LiTing Wang 2023           | China     | Knee osteoarthritis                              | unknown | unknown | Visual analogue scale                                           | unknown              | Cochrane risk of bias tool                                                        | not inform |
|                            |           |                                                  |         |         | Western ontario and mcmaster universities osteoarthritis index  |                      |                                                                                   |            |
| Lezheng Wang 2019          | China     | Lateral epicondylitis                            | unknown | unknown | Visual analogue scale                                           | unknown              | Cochrane risk of bias tool                                                        | not inform |
|                            |           |                                                  |         |         | Grip strength                                                   |                      |                                                                                   |            |
| Xiaoxi Mou 2020            | China     | Achilles tendinopathy                            | unknown | unknown | Visual analogue scale                                           | unknown              | Cochrane risk of bias tool and Newcastle-Ottawa scale                             | not inform |
|                            |           |                                                  |         |         | Numerical rating scale                                          |                      |                                                                                   |            |
|                            |           |                                                  |         |         | Victorian institute of sports assessment–achilles questionnaire |                      |                                                                                   |            |
| Rocky Nurakbariansyah 2020 | Indonesia | Chronic prostatitis/chronic pelvic pain syndrome | unknown | unknown | American orthopaedic foot and ankle society scale               | unknown              | Cochrane risk of bias tool                                                        | not inform |

|                   |             |                                   |         |         |                                                                                      |         |                                                                      |            |
|-------------------|-------------|-----------------------------------|---------|---------|--------------------------------------------------------------------------------------|---------|----------------------------------------------------------------------|------------|
|                   |             |                                   |         |         | National institute of health-chronic prostatitis symptom index total score           |         |                                                                      |            |
|                   |             |                                   |         |         | National institute of health-chronic prostatitis symptom index pain score            |         |                                                                      |            |
|                   |             |                                   |         |         | National institute of health-chronic prostatitis symptom index urinary symptom score |         |                                                                      |            |
|                   |             |                                   |         |         | National institute of health-chronic prostatitis symptom index quality of life score |         |                                                                      |            |
| Shan Xie 2023     | China       | Spasticity after brain injury     | unknown | unknown | Modified ashworth scale                                                              | unknown | Cochrane risk of bias tool                                           | not inform |
|                   |             |                                   |         |         | Modified tardieu scale                                                               |         |                                                                      |            |
|                   |             |                                   |         |         | Motor impairment evaluation                                                          |         |                                                                      |            |
|                   |             |                                   |         |         | Activities of daily living                                                           |         |                                                                      |            |
|                   |             |                                   |         |         | Pain evaluation                                                                      |         |                                                                      |            |
|                   |             |                                   |         |         | Electrophysiological parameters                                                      |         |                                                                      |            |
|                   |             |                                   |         |         | Indicators of the economic cost                                                      |         |                                                                      |            |
|                   |             |                                   |         |         | Incidence of adverse reaction                                                        |         |                                                                      |            |
|                   |             |                                   |         |         | Dropout rate                                                                         |         |                                                                      |            |
| Kim Da jeong 2023 | South Korea | Chronic musculoskeletal disorders | unknown | unknown | Pain evaluation                                                                      | unknown | Cochrane risk of bias tool                                           | not inform |
|                   |             |                                   |         |         | Function evaluation                                                                  |         |                                                                      |            |
| Kiyeun Nam 2017   | South Korea | Cerebral palsy spasticity         | unknown | unknown | Modified ashworth scale                                                              | unknown | Physiotherapy evidence database scale                                | not inform |
|                   |             |                                   |         |         | Range of motion                                                                      |         |                                                                      |            |
|                   |             |                                   |         |         | Plantar surface area                                                                 |         |                                                                      |            |
|                   |             |                                   |         |         | Peak pressure value of heel                                                          |         |                                                                      |            |
| Xue Xiali 2023    | China       | Rotator cuff tear                 | unknown | unknown | Visual analogue scale                                                                | unknown | Cochrane risk of bias tool                                           | not inform |
|                   |             |                                   |         |         | Constant-murley score                                                                |         |                                                                      |            |
|                   |             |                                   |         |         | University of california at los angeles shoulder rating scale                        |         |                                                                      |            |
|                   |             |                                   |         |         | Range of motion                                                                      |         |                                                                      |            |
|                   |             |                                   |         |         | American shoulder and elbow surgeons form                                            |         |                                                                      |            |
| Chaitanya J 2022  | India       | Cerebral palsy spasticity         | unknown | unknown | Modified ashworth scale                                                              | unknown | Cochrane risk of bias tool and Physiotherapy evidence database scale | not inform |
|                   |             |                                   |         |         | Modified tardieu scale                                                               |         |                                                                      |            |
|                   |             |                                   |         |         | Range of motion                                                                      |         |                                                                      |            |
|                   |             |                                   |         |         | Passive and reflex mediated stiffness                                                |         |                                                                      |            |
| Lun-Xue QING 2018 | China       | Knee osteoarthritis               | unknown | unknown | Pain intensity evaluation                                                            | unknown | Cochrane risk of bias tool                                           | not inform |
|                   |             |                                   |         |         | Quality of life                                                                      |         |                                                                      |            |
|                   |             |                                   |         |         | Function status                                                                      |         |                                                                      |            |
| LUO ZHIQIANG 2023 | China       | Lumbar disc herniation            | unknown | unknown | Visual analogue scale                                                                | unknown | Cochrane risk of bias tool and Jadad score                           | not inform |
|                   |             |                                   |         |         | Japanese orthopaedic association score                                               |         |                                                                      |            |
|                   |             |                                   |         |         | Oswestry disability index                                                            |         |                                                                      |            |
|                   |             |                                   |         |         | Recurrence rate                                                                      |         |                                                                      |            |
|                   |             |                                   |         |         | Numerical rating scale                                                               |         |                                                                      |            |
| Yan Yan 2021      | China       | Low back pain                     | unknown | unknown | Incidence of adverse reaction                                                        | unknown | Physiotherapy evidence database scale                                | inform     |
|                   |             |                                   |         |         | Visual analogue scale                                                                |         |                                                                      |            |

|                       |        |                                  |         |         |                                                                         |         |                                                                      |            |
|-----------------------|--------|----------------------------------|---------|---------|-------------------------------------------------------------------------|---------|----------------------------------------------------------------------|------------|
|                       |        |                                  |         |         | Numerical rating scale                                                  |         |                                                                      |            |
|                       |        |                                  |         |         | Oswestry disability index                                               |         |                                                                      |            |
|                       |        |                                  |         |         | Incidence of adverse reaction                                           |         |                                                                      |            |
| Wang Fangqi 2022      | China  | Subacromial shoulder pain        | unknown | unknown | Visual analogue scale                                                   | unknown | Physiotherapy evidence database scale                                | not inform |
|                       |        |                                  |         |         | Numerical rating scale                                                  |         |                                                                      |            |
|                       |        |                                  |         |         | Constant-murley score                                                   |         |                                                                      |            |
|                       |        |                                  |         |         | Shoulder pain and disability Index                                      |         |                                                                      |            |
|                       |        |                                  |         |         | Disabilities of the arm, shoulder and hand score                        |         |                                                                      |            |
|                       |        |                                  |         |         | Health assessment questionnaire                                         |         |                                                                      |            |
| Simple shoulder test  |        |                                  |         |         |                                                                         |         |                                                                      |            |
|                       |        |                                  |         |         | Shoulder disability questionnaire                                       |         |                                                                      |            |
| Jia Chen 2023         | China  | Bone tissue disease              | unknown | unknown | Visual analogue scale                                                   | unknown | Cochrane risk of bias tool                                           | not inform |
|                       |        |                                  |         |         | Lequesne index                                                          |         |                                                                      |            |
|                       |        |                                  |         |         | Western ontario and mcmaster universities osteoarthritis index          |         |                                                                      |            |
|                       |        |                                  |         |         | Harris hip score                                                        |         |                                                                      |            |
|                       |        |                                  |         |         | Range of motion                                                         |         |                                                                      |            |
|                       |        |                                  |         |         | Bone healing rate                                                       |         |                                                                      |            |
|                       |        |                                  |         |         | Fernandezesteve radiological evaluation                                 |         |                                                                      |            |
|                       |        |                                  |         |         | Overall response rate                                                   |         |                                                                      |            |
|                       |        |                                  |         |         | Fracture healing time                                                   |         |                                                                      |            |
| IRIS OTERO LUIS 2023  | Spain  | Spasticity                       | unknown | unknown | Espasticity evaluation                                                  | unknown | Cochrane risk of bias tool                                           | not inform |
| Samah omara 2023      | Egypt  | Plantar fasciitis                | unknown | unknown | Visual analogue scale                                                   | unknown | Cochrane risk of bias tool                                           | not inform |
|                       |        |                                  |         |         | Foot function index                                                     |         |                                                                      |            |
|                       |        |                                  |         |         | Heel tenderness index                                                   |         |                                                                      |            |
|                       |        |                                  |         |         | Pain pressure threshold                                                 |         |                                                                      |            |
|                       |        |                                  |         |         | American orthopaedic foot and ankle society scale                       |         |                                                                      |            |
|                       |        |                                  |         |         | Flexor digitorum brevis thickness                                       |         |                                                                      |            |
|                       |        |                                  |         |         | Skin blood flow and temperature                                         |         |                                                                      |            |
|                       |        |                                  |         |         | Plantar fascia thickness                                                |         |                                                                      |            |
| Patricia ventura 2020 | Brazil | Breast cancer-related lymphedema | unknown | unknown | Incidence of adverse reaction                                           | unknown | Cochrane risk of bias tool and Physiotherapy evidence database scale | not inform |
|                       |        |                                  |         |         | Volume evaluation                                                       |         |                                                                      |            |
| Lehua Yu 2022         | China  | Post-burn pathological scar      | unknown | unknown | Pain intensity evaluation                                               | unknown | Physiotherapy evidence database scale                                | not inform |
|                       |        |                                  |         |         | Pruritus evaluation                                                     |         |                                                                      |            |
|                       |        |                                  |         |         | Scar thickness evaluation                                               |         |                                                                      |            |
|                       |        |                                  |         |         | Skin elasticity evaluation                                              |         |                                                                      |            |
|                       |        |                                  |         |         | Vascularity evaluation                                                  |         |                                                                      |            |
| Liu Shuai 2020        | China  | Erectile dysfunction             | unknown | unknown | Transepidermal water loss evaluation                                    | unknown | Cochrane risk of bias tool                                           | not inform |
|                       |        |                                  |         |         | International index of erectile function-erectile function domain score |         |                                                                      |            |

|                         |           |                                      |         |         |                                                                                      |         |                                                                                     |            |
|-------------------------|-----------|--------------------------------------|---------|---------|--------------------------------------------------------------------------------------|---------|-------------------------------------------------------------------------------------|------------|
|                         |           |                                      |         |         | Erection hardness score                                                              |         |                                                                                     |            |
| Yijun Lin 2023          | China     | Myofascial pain syndrome             | unknown | unknown | Visual analogue scale                                                                | unknown | Cochrane risk of bias tool and Physiotherapy evidence database scale                | not inform |
|                         |           |                                      |         |         | Numerical rating scale                                                               |         |                                                                                     |            |
|                         |           |                                      |         |         | Pain pressure threshold                                                              |         |                                                                                     |            |
|                         |           |                                      |         |         |                                                                                      |         |                                                                                     |            |
| Ervandy Rangganata 2020 | Indonesia | Chronic non-bacterial prostatitis    | unknown | unknown | Visual analogue scale                                                                | unknown | Cochrane risk of bias tool                                                          | not inform |
|                         |           |                                      |         |         | National institute of health-chronic prostatitis symptom index total score           |         |                                                                                     |            |
|                         |           |                                      |         |         | National institute of health-chronic prostatitis symptom index urinary symptom score |         |                                                                                     |            |
|                         |           |                                      |         |         | National institute of health-chronic prostatitis symptom index quality of life score |         |                                                                                     |            |
| Huan Liu 2020           | China     | Stenosing tenosynovitis              | unknown | unknown | Pain intensity evaluation                                                            | unknown | Cochrane risk of bias tool                                                          | not inform |
|                         |           |                                      |         |         | Incidence of adverse reaction                                                        |         |                                                                                     |            |
| Li Zhang 2021           | China     | Hypertrophic scars and Keloids       | unknown | unknown | Size of scars                                                                        | unknown | Cochrane risk of bias tool                                                          | not inform |
|                         |           |                                      |         |         | Pain symptoms of scars                                                               |         |                                                                                     |            |
|                         |           |                                      |         |         | Pigmentation of scars                                                                |         |                                                                                     |            |
|                         |           |                                      |         |         | Elasticity or pliability of scars                                                    |         |                                                                                     |            |
|                         |           |                                      |         |         | Related function evaluation                                                          |         |                                                                                     |            |
| Li Zhang 2022           | China     | Post-burn pathological scar          | unknown | unknown | Thickness of scars                                                                   | unknown | Cochrane risk of bias tool                                                          | not inform |
|                         |           |                                      |         |         | Uncomfortable symptoms of scars                                                      |         |                                                                                     |            |
|                         |           |                                      |         |         | Vancouver scar scale                                                                 |         |                                                                                     |            |
|                         |           |                                      |         |         | Elasticity or pliability of scars                                                    |         |                                                                                     |            |
|                         |           |                                      |         |         | Incidence of adverse reaction                                                        |         |                                                                                     |            |
| Kun Liu 2023            | China     | Low back pain                        | unknown | unknown | Visual analogue scale                                                                | unknown | Cochrane risk of bias tool                                                          | not inform |
|                         |           |                                      |         |         | Oswestry disability index                                                            |         |                                                                                     |            |
|                         |           |                                      |         |         | Incidence of adverse reaction                                                        |         |                                                                                     |            |
| Apurba Barman 2020      | India     | Musculoskeletal soft tissue injuries | unknown | unknown | Visual analogue scale                                                                | unknown | Cochrane risk of bias tool                                                          | not inform |
|                         |           |                                      |         |         | Numerical rating scale                                                               |         |                                                                                     |            |
|                         |           |                                      |         |         | Incidence of adverse reaction                                                        |         |                                                                                     |            |
| Yu-Chi Su 2022          | China     | Plantar and palmar fibromatosis      | unknown | unknown | Visual analogue scale                                                                | unknown | Cochrane risk of bias tool and Joanna Briggs Institute critical appraisal checklist | not inform |
|                         |           |                                      |         |         | Range of motion                                                                      |         |                                                                                     |            |
| Hongcheng Tao 2023      | China     | Osteonecrosis of the femoral head    | unknown | unknown | Harris hip score                                                                     | unknown | Cochrane risk of bias tool and Newcastle-Ottawa scale                               | not inform |
|                         |           |                                      |         |         | Visual analogue scale                                                                |         |                                                                                     |            |
|                         |           |                                      |         |         | Incidence of adverse reaction                                                        |         |                                                                                     |            |
| Kunyan Wang 2023        | China     | Rotator cuff tear                    | unknown | unknown | Visual analogue scale                                                                | unknown | Cochrane risk of bias tool and Jadad score                                          | not inform |
|                         |           |                                      |         |         | Constant-murley score                                                                |         |                                                                                     |            |
|                         |           |                                      |         |         | Range of motion                                                                      |         |                                                                                     |            |
|                         |           |                                      |         |         | Shoulder pain and disability index                                                   |         |                                                                                     |            |
| Yafeng Li 2020          | China     | Tenosynovitis                        | unknown | unknown | Visual analogue scale                                                                | unknown | Cochrane risk of bias tool                                                          | not inform |
| Xin Gao 2023            | China     | Delayed fracture union and nonunion  | unknown | unknown | Cooney score                                                                         | unknown | Cochrane risk of bias tool and Jadad score                                          | not inform |
|                         |           |                                      |         |         | Recovery rate                                                                        |         |                                                                                     |            |

|                       |       |                                     |         |         |                                                                |         |                                                                            |            |
|-----------------------|-------|-------------------------------------|---------|---------|----------------------------------------------------------------|---------|----------------------------------------------------------------------------|------------|
|                       |       |                                     |         |         | Healing time                                                   |         |                                                                            |            |
|                       |       |                                     |         |         | Callus line score                                              |         |                                                                            |            |
|                       |       |                                     |         |         | Economic burden evaluation                                     |         |                                                                            |            |
|                       |       |                                     |         |         | Fracture gap                                                   |         |                                                                            |            |
|                       |       |                                     |         |         | Incidence of adverse reaction                                  |         |                                                                            |            |
| Qiangru Huang 2018    | China | Diabetic foot ulcers                | unknown | unknown | Blood flow perfusion rate                                      | unknown | Cochrane risk of bias tool                                                 | not inform |
|                       |       |                                     |         |         | Average wound healing time                                     |         |                                                                            |            |
|                       |       |                                     |         |         | Numeric box scale                                              |         |                                                                            |            |
|                       |       |                                     |         |         | Visual analogue scale                                          |         |                                                                            |            |
| Yu Nong Ao 2018       | China | Knee osteoarthritis                 | unknown | unknown | Visual analogue scale                                          | unknown | Cochrane risk of bias tool and<br>Physiotherapy evidence database scale    | not inform |
|                       |       |                                     |         |         | Range of motion                                                |         |                                                                            |            |
|                       |       |                                     |         |         | Western ontario and mcmaster universities osteoarthritis index |         |                                                                            |            |
| Sayed Anvar 2022      | India | Musculoskeletal conditions          | unknown | unknown | Visual analogue scale                                          | unknown | Cochrane risk of bias tool and<br>Physiotherapy evidence database scale    | not inform |
|                       |       |                                     |         |         | Grip strength                                                  |         |                                                                            |            |
|                       |       |                                     |         |         | Pinch strength                                                 |         |                                                                            |            |
|                       |       |                                     |         |         | Foot function index                                            |         |                                                                            |            |
|                       |       |                                     |         |         | Quick disability of arm, shoulder and hand                     |         |                                                                            |            |
| Zhuorao Wu 2023       | China | Low back pain                       | unknown | unknown | Finger-floor distance                                          | unknown | Cochrane risk of bias tool                                                 | not inform |
|                       |       |                                     |         |         | Visual analogue scale                                          |         |                                                                            |            |
|                       |       |                                     |         |         | Japanese orthopaedic association score                         |         |                                                                            |            |
|                       |       |                                     |         |         | Oswestry disability index                                      |         |                                                                            |            |
|                       |       |                                     |         |         | Beck depression inventory                                      |         |                                                                            |            |
|                       |       |                                     |         |         | Incidence of adverse reaction                                  |         |                                                                            |            |
| Juan Avedaño-Coy 2022 | Spain | Myofascial pain syndrome            | unknown | unknown | Pain intensity evaluation                                      | unknown | Cochrane risk of bias tool                                                 | not inform |
|                       |       |                                     |         |         | Pressure pain threshold                                        |         |                                                                            |            |
|                       |       |                                     |         |         | Functionality evaluation                                       |         |                                                                            |            |
|                       |       |                                     |         |         | Range of motion                                                |         |                                                                            |            |
|                       |       |                                     |         |         | Incidence of adverse reaction                                  |         |                                                                            |            |
|                       |       |                                     |         |         | Quality of life                                                |         |                                                                            |            |
| Shanshan Liu 2022     | China | Temporomandibular joint disorder    | unknown | unknown | Visual analogue scale                                          | unknown | Physiotherapy evidence database scale                                      | not inform |
|                       |       |                                     |         |         | Maximum mouth opening                                          |         |                                                                            |            |
|                       |       |                                     |         |         | Disability evaluation                                          |         |                                                                            |            |
| Bijan Forogh 2022     | Iran  | Calcific tendinitis of the shoulder | unknown | unknown | Pain intensity evaluation                                      | unknown | National Heart, Lung, and Blood Institute<br>study quality assessment tool | not inform |
|                       |       |                                     |         |         | Range of motion                                                |         |                                                                            |            |
| Kai LI 2020           | China | Post-stroke upper limb spasticity   | unknown | unknown | Modified ashworth scale                                        | unknown | Not inform                                                                 | not inform |
|                       |       |                                     |         |         | Modified tardieu scale                                         |         |                                                                            |            |
| Fangqi Wang 2022      | China | Rotator cuff tendinopathy           | unknown | unknown | Visual analogue scale                                          | unknown | Physiotherapy evidence database scale                                      | not inform |
|                       |       |                                     |         |         | Numerical rating scale                                         |         |                                                                            |            |



|                       |             |                                   |         |         |                                                                         |         |                                                                                                                      |            |
|-----------------------|-------------|-----------------------------------|---------|---------|-------------------------------------------------------------------------|---------|----------------------------------------------------------------------------------------------------------------------|------------|
|                       |             |                                   |         |         | Constant-murley score                                                   |         |                                                                                                                      |            |
|                       |             |                                   |         |         | Shoulder pain and disability Index                                      |         |                                                                                                                      |            |
|                       |             |                                   |         |         | Disabilities of the arm, shoulder and hand score                        |         |                                                                                                                      |            |
|                       |             |                                   |         |         | Health assessment questionnaire                                         |         |                                                                                                                      |            |
|                       |             |                                   |         |         | Simple shoulder test                                                    |         |                                                                                                                      |            |
|                       |             |                                   |         |         | Shoulder disability questionnaire                                       |         |                                                                                                                      |            |
| Grzegorz Fojecki 2015 | Denmark     | Urological diseases               | unknown | unknown | Visual analogue scale                                                   | unknown | Not inform                                                                                                           | not inform |
|                       |             |                                   |         |         | Penile curvature                                                        |         |                                                                                                                      |            |
|                       |             |                                   |         |         | Quality of life                                                         |         |                                                                                                                      |            |
|                       |             |                                   |         |         | International index of erectile function-erectile function domain score |         |                                                                                                                      |            |
|                       |             |                                   |         |         | Erection hardness score                                                 |         |                                                                                                                      |            |
| Shristi Shakya 2023   | India       | Cerebral palsy spasticity         | unknown | unknown | Head control                                                            | unknown | Physiotherapy evidence database scale                                                                                | not inform |
|                       |             |                                   |         |         | Trunk control                                                           |         |                                                                                                                      |            |
|                       |             |                                   |         |         | Head and trunk control                                                  |         |                                                                                                                      |            |
|                       |             |                                   |         |         | Gross motor function                                                    |         |                                                                                                                      |            |
|                       |             |                                   |         |         | Activities of daily living                                              |         |                                                                                                                      |            |
| Hong Li Xu 2023       | China       | Low back pain                     | unknown | unknown | Pain intensity evaluation                                               | unknown | Cochrane risk of bias tool                                                                                           | not inform |
|                       |             |                                   |         |         | Oswestry disability index                                               |         |                                                                                                                      |            |
|                       |             |                                   |         |         | Beck depression scale                                                   |         |                                                                                                                      |            |
|                       |             |                                   |         |         | Finger-floor distance                                                   |         |                                                                                                                      |            |
|                       |             |                                   |         |         | 36-item short-form                                                      |         |                                                                                                                      |            |
| Chaoqun Feng 2023     | China       | Plantar fasciitis                 | unknown | unknown | Curative effect                                                         | unknown | Cochrane risk of bias tool                                                                                           | not inform |
|                       |             |                                   |         |         | Pain intensity evaluation                                               |         |                                                                                                                      |            |
|                       |             |                                   |         |         | Function evaluation                                                     |         |                                                                                                                      |            |
| Xiangyu Zhu 2022      | China       | Achilles tendinopathy             | unknown | unknown | Visual analogue scale                                                   | unknown | Cochrane risk of bias tool                                                                                           | not inform |
| Jin Mei 2020          | China       | Osteonecrosis of the femoral head | unknown | unknown | Harris hip score                                                        | unknown | National Institute for Clinical Excellence case series scoring standard tool, Newcastle-Ottawa scale and Jadad score | not inform |
|                       |             |                                   |         |         | Visual analogue scale                                                   |         |                                                                                                                      |            |
|                       |             |                                   |         |         | Radiography evaluation                                                  |         |                                                                                                                      |            |
| Jun-Il Yoo 2019       | South Korea | Myofascial pain syndrome          | unknown | unknown | Visual analogue scale                                                   | unknown | Cochrane risk of bias tool                                                                                           | not inform |
|                       |             |                                   |         |         | Neck disability index                                                   |         |                                                                                                                      |            |
|                       |             |                                   |         |         | Constant-murley score                                                   |         |                                                                                                                      |            |
| Yueting Wang 2022     | China       | Postpartum dysfunction            | unknown | unknown | Abdominal circumference                                                 | unknown | Cochrane risk of bias tool                                                                                           | not inform |
|                       |             |                                   |         |         | Rectus abdominis separation index                                       |         |                                                                                                                      |            |
|                       |             |                                   |         |         | Visual analogue scale                                                   |         |                                                                                                                      |            |
|                       |             |                                   |         |         | Electromyography evaluation                                             |         |                                                                                                                      |            |
|                       |             |                                   |         |         | Sexual satisfaction                                                     |         |                                                                                                                      |            |
| Wang-Sheng Lin 2021   | China       | Breast cancer-related lymphedema  | unknown | unknown | Female sexual function index                                            | unknown | Not inform                                                                                                           | not inform |
|                       |             |                                   |         |         | Volume evaluation                                                       |         |                                                                                                                      |            |

|                          |             |                                                  |         |         |                                                                         |         |                                            |            |
|--------------------------|-------------|--------------------------------------------------|---------|---------|-------------------------------------------------------------------------|---------|--------------------------------------------|------------|
|                          |             |                                                  |         |         | Circumference evaluation                                                |         |                                            |            |
|                          |             |                                                  |         |         | Bioelectrical impedance                                                 |         |                                            |            |
|                          |             |                                                  |         |         | Skin thickness                                                          |         |                                            |            |
|                          |             |                                                  |         |         | Visual analogue scale                                                   |         |                                            |            |
|                          |             |                                                  |         |         | Quick disability of arm, shoulder and hand                              |         |                                            |            |
| Xinchao Shi 2020         | China       | Patellar tendinopathy                            | unknown | unknown | Visual analogue scale                                                   | unknown | Physiotherapy evidence database scale      | not inform |
|                          |             |                                                  |         |         | Numerical rating scale                                                  |         |                                            |            |
|                          |             |                                                  |         |         | Victorian institute of sport australia-patella questionnaire            |         |                                            |            |
| Yu Qin 2020              | China       | Low back pain                                    | unknown | unknown | Pain intensity evaluation                                               | unknown | Cochrane risk of bias tool                 | not inform |
|                          |             |                                                  |         |         | Functional evaluation                                                   |         |                                            |            |
|                          |             |                                                  |         |         | Quality of life                                                         |         |                                            |            |
|                          |             |                                                  |         |         | Psychological evaluation                                                |         |                                            |            |
|                          |             |                                                  |         |         | Incidence of adverse reaction                                           |         |                                            |            |
| Anuj Punnoose 2013       | England(UK) | Lower limb tendinopathy                          | unknown | unknown | Visual analogue scale                                                   | unknown | Physiotherapy evidence database scale      | not inform |
|                          |             |                                                  |         |         | Numerical rating scale                                                  |         |                                            |            |
|                          |             |                                                  |         |         | Victorian institute of sport australia-patella questionnaire            |         |                                            |            |
|                          |             |                                                  |         |         | Victorian institute of sports assessment-achilles questionnaire         |         |                                            |            |
|                          |             |                                                  |         |         | Tendon thickness                                                        |         |                                            |            |
|                          |             |                                                  |         |         | Range of motion                                                         |         |                                            |            |
|                          |             |                                                  |         |         | Strength evaluation                                                     |         |                                            |            |
| Rosa Cabanas-Valdes 2018 | Spain       | Post-stroke upper limb spasticity                | unknown | unknown | Modified ashworth scale                                                 | unknown | Physiotherapy evidence database scale      | not inform |
|                          |             |                                                  |         |         | Modified tardieu scale                                                  |         |                                            |            |
|                          |             |                                                  |         |         | Range of motion                                                         |         |                                            |            |
|                          |             |                                                  |         |         | F waves and H-reflex latency                                            |         |                                            |            |
|                          |             |                                                  |         |         | Motricity, dexterity, pain, muscle spasms evaluation                    |         |                                            |            |
| Danyang liu 2019         | China       | Spasticity after upper motor neuron injury       | unknown | unknown | Modified ashworth scale                                                 | unknown | Cochrane risk of bias tool                 | not inform |
|                          |             |                                                  |         |         | Gross motor function measurement                                        |         |                                            |            |
|                          |             |                                                  |         |         | Passive range of motion                                                 |         |                                            |            |
|                          |             |                                                  |         |         | Plantar pressure                                                        |         |                                            |            |
|                          |             |                                                  |         |         | Plantar area                                                            |         |                                            |            |
| Wei Changhao 2020        | China       | Knee osteoarthritis                              | unknown | unknown | Visual analogue scale                                                   | unknown | Cochrane risk of bias tool                 | not inform |
|                          |             |                                                  |         |         | Western ontario and mcmaster universities osteoarthritis index          |         |                                            |            |
|                          |             |                                                  |         |         | Lysholm score                                                           |         |                                            |            |
|                          |             |                                                  |         |         | Incidence of adverse reaction                                           |         |                                            |            |
| Lezheng Wang 2020        | China       | Chronic prostatitis/chronic pelvic pain syndrome | unknown | unknown | International index of erectile function-erectile function domain score | unknown | Cochrane risk of bias tool and Jadad score | not inform |
|                          |             |                                                  |         |         | Maximum urinary flow rate                                               |         |                                            |            |
|                          |             |                                                  |         |         | Post void residual volume                                               |         |                                            |            |
|                          |             |                                                  |         |         | Visual analogue scale                                                   |         |                                            |            |

|                    |       |                                   |         |         |                                                                                      |         |                            |            |
|--------------------|-------|-----------------------------------|---------|---------|--------------------------------------------------------------------------------------|---------|----------------------------|------------|
|                    |       |                                   |         |         | International prognostic scoring system                                              |         |                            |            |
|                    |       |                                   |         |         | National institute of health-chronic prostatitis symptom index total score           |         |                            |            |
|                    |       |                                   |         |         | National institute of health-chronic prostatitis symptom index pain score            |         |                            |            |
|                    |       |                                   |         |         | National institute of health-chronic prostatitis symptom index urinary symptom score |         |                            |            |
|                    |       |                                   |         |         | National institute of health-chronic prostatitis symptom index quality of life score |         |                            |            |
| Chao Li 2023       | China | Post-stroke lower limb spasticity | unknown | unknown | Modified ashworth scale                                                              | unknown | Cochrane risk of bias tool | not inform |
|                    |       |                                   |         |         | Modified tardieu scale                                                               |         |                            |            |
|                    |       |                                   |         |         | Passive range of motion                                                              |         |                            |            |
|                    |       |                                   |         |         | Fugl-meyer assessment                                                                |         |                            |            |
|                    |       |                                   |         |         | Incidence of adverse reaction                                                        |         |                            |            |
| Xiaofeng Wang 2023 | China | Peyronie's Disease                | unknown | unknown | Penile curvature reduction                                                           | unknown | Cochrane risk of bias tool | not inform |
|                    |       |                                   |         |         | Proportion of patients with plate reduction                                          |         |                            |            |
|                    |       |                                   |         |         | Visual analogue scale                                                                |         |                            |            |
|                    |       |                                   |         |         | Incidence of adverse reaction                                                        |         |                            |            |
|                    |       |                                   |         |         | Self-made scale                                                                      |         |                            |            |
|                    |       |                                   |         |         | International index of erectile function-erectile function domain score              |         |                            |            |
| Lu Chen 2019       | China | Osteoarthritis                    | unknown | unknown | Visual analogue scale                                                                | unknown | Newcastle-Ottawa scale     | not inform |
|                    |       |                                   |         |         | Western ontario and mcmaster universities osteoarthritis index                       |         |                            |            |

Note: GRADE, Grading of Recommendations Assessment, Development and Evaluation; SRs, systematic reviews.
