# Supplementary material for: Effectiveness and Safety of Type- and Energy-based Extracorporeal Shockwave Therapy in Clinical Practice: Umbrella Review and Evidence Mapping
Source: bioRxiv or medRxiv preprint supplement (doi:10.1101/2024.01.07.24300948), 2024-01-09
Supplement: Supplementary file [file media-15.pdf]

**Supplementary Table S2 Number of randomised controlled trials reporting specific adverse reactions related to system organ class and preferred term**

| System organ class                                   | Preferred term          | Number of RCTs (%) |
|------------------------------------------------------|-------------------------|--------------------|
| General disorders and administration site conditions | Pain                    | 35 (16.5)          |
|                                                      | Flushing                | 26 (12.3)          |
|                                                      | Swelling                | 18 (8.5)           |
|                                                      | Oedema                  | 3 (1.4)            |
|                                                      | Pyrexia                 | 3 (1.4)            |
|                                                      | Tenderness              | 2 (1.0)            |
|                                                      | Fatigue                 | 1 (0.5)            |
|                                                      | Discomfort              | 1 (0.5)            |
| Skin and subcutaneous tissue disorders               | Paraesthesia            | 7 (3.3)            |
|                                                      | Hypoaesthesia           | 7 (3.3)            |
|                                                      | Skin discomfort         | 7 (3.3)            |
|                                                      | Contusion               | 6 (2.8)            |
|                                                      | Erythema                | 5 (2.4)            |
|                                                      | Rash                    | 2 (1.0)            |
|                                                      | Skin injury             | 1 (0.5)            |
|                                                      | Skin abrasion           | 1 (0.5)            |
|                                                      | Alopecia                | 1 (0.5)            |
|                                                      | Skin irritation         | 1 (0.5)            |
|                                                      | Hyperhidrosis           | 1 (0.5)            |
|                                                      | Pallor                  | 1 (0.5)            |
|                                                      | Skin burning sensation  | 1 (0.5)            |
|                                                      | Sensitive skin          | 1 (0.5)            |
| Vascular disorders                                   | Haematoma               | 9 (4.3)            |
|                                                      | Skin haemorrhage        | 8 (3.8)            |
|                                                      | Ecchymosis              | 8 (3.8)            |
|                                                      | Petechiae               | 7 (3.3)            |
|                                                      | Orthostatic hypotension | 1 (0.5)            |
|                                                      | Haematuria              | 1 (0.5)            |
|                                                      | Haemospermia            | 1 (0.5)            |
|                                                      | Penile haemorrhage      | 1 (0.5)            |
| Vasodilatation                                       | 1 (0.5)                 |                    |
| Nervous system disorders                             | Dizziness               | 5 (2.4)            |
|                                                      | Headache                | 4 (1.9)            |
|                                                      | Neuropathy peripheral   | 2 (1.0)            |
|                                                      | Dyssomnia               | 1 (0.5)            |
|                                                      | Migraine                | 1 (0.5)            |
|                                                      | Tremor                  | 1 (0.5)            |
|                                                      | Syncope                 | 1 (0.5)            |
| Gastrointestinal disorders                           | Nausea                  | 10 (4.7)           |
|                                                      | Abdominal discomfort    | 2 (1.0)            |
| Musculoskeletal and connective tissue disorders      | Arthralgia              | 3 (1.4)            |
|                                                      | Myalgia                 | 2 (1.0)            |
|                                                      | Hypertonia              | 1 (0.5)            |
|                                                      | Joint dislocation       | 1 (0.5)            |
|                                                      | Joint effusion          | 1 (0.5)            |
|                                                      | Joint stiffness         | 1 (0.5)            |
|                                                      | Muscular weakness       | 1 (0.5)            |
| Infections and infestations                          | Infection               | 2 (1.0)            |
| General system disorders                             | Asthenia                | 1 (0.5)            |
| Renal and urinary disorders                          | Dysuria                 | 1 (0.5)            |
| Cardiac disorders                                    | Palpitations            | 1 (0.5)            |
| Immune system disorders                              | Hypersensitivity        | 1 (0.5)            |
| Respiratory, thoracic and mediastinal disorders      | Nasal discomfort        | 1 (0.5)            |

Note: RCTs, randomised controlled trials.
